# Supplementary material for: Non-invasive measurements to identify mungbean genotypes for waterlogging tolerance
Source: PeerJ. 2024 Feb 23;12:e16872. doi: 10.7717/peerj.16872 (PMC10896077; doi:10.7717/peerj.16872)
Supplement: Supplemental Information 1 [file peerj-12-16872-s001.xlsx]

## Sheet: datarearrangedforcorrelation
	Plant height	No. of branches	NDVI	QY_max	Total Chl	MSI	No. of pods	Seed Yield				Plant height	No. of branches	NDVI	QY_max	Total Chl	MSI	No. of pods	Seed Yield
EC-693356	58.5	6.25	0.641944	0.753333	0.4525	79.6757	58.5	14.2975			EC-693356	51.5	6	0.556389	0.69	0.4425	76.6867	43	10.27
EC-693357	56	4.75	0.589722	0.731667	0.41	79.51	46.75	11.1475			EC-693357	49	4.5	0.512222	0.63	0.331667	75.2894	30.75	7.0525
EC-693358	56	4.75	0.555556	0.733333	0.4125	78.8962	45	10.7825			EC-693358	49	4.5	0.486111	0.581667	0.315	74.7961	25.25	5.6
EC-693363	53.875	5	0.556389	0.726667	0.425833	80.0544	38.25	9.0325			EC-693363	32.875	4.25	0.483611	0.596667	0.345833	76.206	28.5	6.41
Harsha	48.25	5.25	0.613333	0.749444	0.423333	80.4626	51.75	12.6			Harsha	41.625	4	0.523889	0.656667	0.4025	77.3565	31.5	7.25
IC-415144	60.25	4.75	0.644444	0.757222	0.471667	80.3669	48.5	11.7125			IC-415144	53	4.5	0.556389	0.696111	0.43	77.5721	32.25	7.4825
IPM-205-7	48.25	4.5	0.551944	0.732778	0.4075	79.9863	34	7.92			IPM-205-7	30.875	4	0.474167	0.575556	0.329167	75.3145	21	4.49
NM-94	42.875	4	0.591667	0.73	0.401667	80.964	45.75	10.92			NM-94	35.625	4	0.515	0.613333	0.360833	76.3551	26.5	6.0275
PAU-911	60.25	5.25	0.644167	0.752222	0.451667	80.8035	56.25	13.695			PAU-911	53	3.75	0.551111	0.673333	0.4025	77.537	33.25	7.6825
Vaibhav	39.75	5.75	0.611667	0.743889	0.424167	81.8258	42.25	10.015			Vaibhav	32.125	3.75	0.534722	0.660556	0.415833	77.311	26.5	5.92
VC-3960-88	40.75	6.75	0.612778	0.741111	0.425833	80.6005	49.75	11.9925			VC-3960-88	33.125	4.75	0.53	0.655	0.394167	78.0514	30.5	6.9525
VC-6372 (45-8-1)	43.375	5	0.586667	0.739444	0.365	81.9853	44.75	10.6525			VC-6372 (45-8-1)	36.125	4.75	0.51	0.622222	0.340833	77.6067	31	7.0625
	Plant height	No. of branches	NDVI	QY_max	Total Chl	MSI	No. of pods	Seed Yield				Plant height	No. of branches	NDVI	QY_max	Total Chl	MSI	No. of pods	Seed Yield
Plant height	1										Plant height	1
No. of branches	-0.154858	1									No. of branches	0.333523	1
NDVI	0.255792	0.46517	1								NDVI	0.536736	0.273141	1
QY_max	0.328562	0.441568	0.897813	1							QY_max	0.501013	0.286294	0.977665	1
Total Chl	0.613626	0.316184	0.666769	0.66955	1						Total Chl	0.305374	0.239786	0.901527	0.929592	1
MSI	-0.63606	0.1091	0.270458	0.189105	-0.292609	1					MSI	-0.057939	0.0117442	0.694442	0.721644	0.708156	1
No. of pods	0.380172	0.471884	0.825538	0.718978	0.492439	-0.0457053	1				No. of pods	0.594131	0.71011	0.747226	0.762177	0.666927	0.427831	1
Seed Yield	0.386437	0.472699	0.825406	0.725863	0.502378	-0.0530309	0.999737	1			Seed Yield	0.600511	0.708547	0.753821	0.76616	0.67228	0.423501	0.99961	1
	Plant height	No. of branches	NDVI	QY_max	Total Chl	MSI	No. of pods	Seed Yield				Plant height	No. of branches	NDVI	QY_max	Total Chl	MSI	No. of pods	Seed Yield
Plant height	1										Plant height	1
No. of branches	0.0239809	1									No. of branches	0.111238	1
NDVI	0.0654294	0.216383	1								NDVI	0.288085	0.0746059	1
QY_max	0.107953	0.194982	0.806069	1							QY_max	0.251014	0.0819644	0.955829	1
Total Chl	0.376536	0.0999725	0.444581	0.448298	1						Total Chl	0.0932534	0.0574974	0.812752	0.864142	1
MSI	0.404573	0.0119029	0.0731476	0.0357606	0.0856198	1					MSI	0.00335693	0.000137925	0.48225	0.52077	0.501484	1
No. of pods	0.144531	0.222674	0.681513	0.516929	0.242496	0.00208898	1				No. of pods	0.352992	0.504256	0.558347	0.580913	0.444791	0.183039	1
Seed Yield	0.149334	0.223445	0.681295	0.526877	0.252383	0.00281228	0.999473	1			Seed Yield	0.360613	0.502039	0.568246	0.587001	0.451961	0.179353	0.99922	1

## Sheet: NDVI_final
Sr. No.	PotID	Genotype	Water treatment	Rep	DoS	DoSI	DoObs	DAS	DASI	Obs_No.	NDVI	No. of plants	No. of pods	Seed yield (g)	Podsperplant	Seedyieldperplant (g)
1	P_01	EC-693356	Control	1	2022-07-30	2022-08-20	2022-08-18	19	-2	1	0.42	5	61	14.98	12.2	2.996
2	P_02	EC-693356	Control	2	2022-07-30	2022-08-20	2022-08-18	19	-2	1	0.46	5	59	14.36	11.8	2.872
3	P_03	EC-693356	Control	3	2022-07-30	2022-08-20	2022-08-18	19	-2	1	0.47	5	62	15.29	12.4	3.058
4	P_04	EC-693356	Control	4	2022-07-30	2022-08-20	2022-08-18	19	-2	1	0.45	5	52	12.56	10.4	2.512
5	P_05	EC-693356	Stress	1	2022-07-30	2022-08-20	2022-08-18	19	-2	1	0.41	5	45	10.85	9	2.17
6	P_06	EC-693356	Stress	2	2022-07-30	2022-08-20	2022-08-18	19	-2	1	0.55	4	49	11.73	12.25	2.9325
7	P_07	EC-693356	Stress	3	2022-07-30	2022-08-20	2022-08-18	19	-2	1	0.36	5	40	9.44	8	1.888
8	P_08	EC-693356	Stress	4	2022-07-30	2022-08-20	2022-08-18	19	-2	1	0.46	5	38	9.06	7.6	1.812
9	P_09	EC-693357	Control	1	2022-07-30	2022-08-20	2022-08-18	19	-2	1	0.48	5	39	9.11	7.8	1.822
10	P_10	EC-693357	Control	2	2022-07-30	2022-08-20	2022-08-18	19	-2	1	0.43	5	51	12.27	10.2	2.454
11	P_11	EC-693357	Control	3	2022-07-30	2022-08-20	2022-08-18	19	-2	1	0.45	5	44	10.47	8.8	2.094
12	P_12	EC-693357	Control	4	2022-07-30	2022-08-20	2022-08-18	19	-2	1	0.51	5	53	12.74	10.6	2.548
13	P_13	EC-693357	Stress	1	2022-07-30	2022-08-20	2022-08-18	19	-2	1	0.5	5	28	6.26	5.6	1.252
14	P_14	EC-693357	Stress	2	2022-07-30	2022-08-20	2022-08-18	19	-2	1	0.36	5	28	6.44	5.6	1.288
15	P_15	EC-693357	Stress	3	2022-07-30	2022-08-20	2022-08-18	19	-2	1	0.43	5	28	6.31	5.6	1.262
16	P_16	EC-693357	Stress	4	2022-07-30	2022-08-20	2022-08-18	19	-2	1	0.57	5	39	9.2	7.8	1.84
17	P_17	EC-693358	Control	1	2022-07-30	2022-08-20	2022-08-18	19	-2	1	0.49	5	43	10.24	8.6	2.048
18	P_18	EC-693358	Control	2	2022-07-30	2022-08-20	2022-08-18	19	-2	1	0.42	5	37	8.78	7.4	1.756
19	P_19	EC-693358	Control	3	2022-07-30	2022-08-20	2022-08-18	19	-2	1	0.4	5	49	11.88	9.8	2.376
20	P_20	EC-693358	Control	4	2022-07-30	2022-08-20	2022-08-18	19	-2	1	0.43	5	51	12.23	10.2	2.446
21	P_21	EC-693358	Stress	1	2022-07-30	2022-08-20	2022-08-18	19	-2	1	0.42	5	24	5.34	4.8	1.068
22	P_22	EC-693358	Stress	2	2022-07-30	2022-08-20	2022-08-18	19	-2	1	0.44	5	27	5.96	5.4	1.192
23	P_23	EC-693358	Stress	3	2022-07-30	2022-08-20	2022-08-18	19	-2	1	0.52	5	21	4.56	4.2	0.912
24	P_24	EC-693358	Stress	4	2022-07-30	2022-08-20	2022-08-18	19	-2	1	0.45	5	29	6.54	5.8	1.308
25	P_25	EC-693363	Control	1	2022-07-30	2022-08-20	2022-08-18	19	-2	1	0.49	5	44	10.58	8.8	2.116
26	P_26	EC-693363	Control	2	2022-07-30	2022-08-20	2022-08-18	19	-2	1	0.52	5	35	8.23	7	1.646
27	P_27	EC-693363	Control	3	2022-07-30	2022-08-20	2022-08-18	19	-2	1	0.36	5	35	8.12	7	1.624
28	P_28	EC-693363	Control	4	2022-07-30	2022-08-20	2022-08-18	19	-2	1	0.42	5	39	9.2	7.8	1.84
29	P_29	EC-693363	Stress	1	2022-07-30	2022-08-20	2022-08-18	19	-2	1	0.31	2	26	5.74	13	2.87
30	P_30	EC-693363	Stress	2	2022-07-30	2022-08-20	2022-08-18	19	-2	1	0.5	5	27	6.03	5.4	1.206
31	P_31	EC-693363	Stress	3	2022-07-30	2022-08-20	2022-08-18	19	-2	1	0.37	4	29	6.51	7.25	1.6275
32	P_32	EC-693363	Stress	4	2022-07-30	2022-08-20	2022-08-18	19	-2	1	0.47	5	32	7.36	6.4	1.472
33	P_33	Harsha	Control	1	2022-07-30	2022-08-20	2022-08-18	19	-2	1	0.43	5	57	13.97	11.4	2.794
34	P_34	Harsha	Control	2	2022-07-30	2022-08-20	2022-08-18	19	-2	1	0.4	5	56	13.74	11.2	2.748
35	P_35	Harsha	Control	3	2022-07-30	2022-08-20	2022-08-18	19	-2	1	0.39	5	44	10.56	8.8	2.112
36	P_36	Harsha	Control	4	2022-07-30	2022-08-20	2022-08-18	19	-2	1	0.54	5	50	12.13	10	2.426
37	P_37	Harsha	Stress	1	2022-07-30	2022-08-20	2022-08-18	19	-2	1	0.31	5	33	7.62	6.6	1.524
38	P_38	Harsha	Stress	2	2022-07-30	2022-08-20	2022-08-18	19	-2	1	0.4	5	36	8.43	7.2	1.686
39	P_39	Harsha	Stress	3	2022-07-30	2022-08-20	2022-08-18	19	-2	1	0.38	5	26	5.89	5.2	1.178
40	P_40	Harsha	Stress	4	2022-07-30	2022-08-20	2022-08-18	19	-2	1	0.5	5	31	7.06	6.2	1.412
41	P_41	IC-415144	Control	1	2022-07-30	2022-08-20	2022-08-18	19	-2	1	0.49	5	40	9.4	8	1.88
42	P_42	IC-415144	Control	2	2022-07-30	2022-08-20	2022-08-18	19	-2	1	0.4	5	48	11.65	9.6	2.33
43	P_43	IC-415144	Control	3	2022-07-30	2022-08-20	2022-08-18	19	-2	1	0.5	4	54	13.11	13.5	3.2775
44	P_44	IC-415144	Control	4	2022-07-30	2022-08-20	2022-08-18	19	-2	1	0.42	5	52	12.69	10.4	2.538
45	P_45	IC-415144	Stress	1	2022-07-30	2022-08-20	2022-08-18	19	-2	1	0.49	5	32	7.3	6.4	1.46
46	P_46	IC-415144	Stress	2	2022-07-30	2022-08-20	2022-08-18	19	-2	1	0.38	4	37	8.73	9.25	2.1825
47	P_47	IC-415144	Stress	3	2022-07-30	2022-08-20	2022-08-18	19	-2	1	0.37	4	27	6.15	6.75	1.5375
48	P_48	IC-415144	Stress	4	2022-07-30	2022-08-20	2022-08-18	19	-2	1	0.41	5	33	7.75	6.6	1.55
49	P_49	IPM-205-7	Control	1	2022-07-30	2022-08-20	2022-08-18	19	-2	1	0.39	5	40	9.58	8	1.916
50	P_50	IPM-205-7	Control	2	2022-07-30	2022-08-20	2022-08-18	19	-2	1	0.41	5	32	7.37	6.4	1.474
51	P_51	IPM-205-7	Control	3	2022-07-30	2022-08-20	2022-08-18	19	-2	1	0.34	3	28	6.44	9.33333	2.14667
52	P_52	IPM-205-7	Control	4	2022-07-30	2022-08-20	2022-08-18	19	-2	1	0.5	5	36	8.29	7.2	1.658
53	P_53	IPM-205-7	Stress	1	2022-07-30	2022-08-20	2022-08-18	19	-2	1	0.42	1	24	5.25	24	5.25
54	P_54	IPM-205-7	Stress	2	2022-07-30	2022-08-20	2022-08-18	19	-2	1	0.48	2	20	4.38	10	2.19
55	P_55	IPM-205-7	Stress	3	2022-07-30	2022-08-20	2022-08-18	19	-2	1	0.4	3	20	4.15	6.66667	1.38333
56	P_56	IPM-205-7	Stress	4	2022-07-30	2022-08-20	2022-08-18	19	-2	1	0.34	3	20	4.18	6.66667	1.39333
57	P_57	NM-94	Control	1	2022-07-30	2022-08-20	2022-08-18	19	-2	1	0.48	5	39	9.12	7.8	1.824
58	P_58	NM-94	Control	2	2022-07-30	2022-08-20	2022-08-18	19	-2	1	0.44	5	46	11.01	9.2	2.202
59	P_59	NM-94	Control	3	2022-07-30	2022-08-20	2022-08-18	19	-2	1	0.53	5	46	10.99	9.2	2.198
60	P_60	NM-94	Control	4	2022-07-30	2022-08-20	2022-08-18	19	-2	1	0.48	5	52	12.56	10.4	2.512
61	P_61	NM-94	Stress	1	2022-07-30	2022-08-20	2022-08-18	19	-2	1	0.55	4	24	5.42	6	1.355
62	P_62	NM-94	Stress	2	2022-07-30	2022-08-20	2022-08-18	19	-2	1	0.49	5	28	6.32	5.6	1.264
63	P_63	NM-94	Stress	3	2022-07-30	2022-08-20	2022-08-18	19	-2	1	0.43	5	28	6.44	5.6	1.288
64	P_64	NM-94	Stress	4	2022-07-30	2022-08-20	2022-08-18	19	-2	1	0.45	5	26	5.93	5.2	1.186
65	P_65	PAU-911	Control	1	2022-07-30	2022-08-20	2022-08-18	19	-2	1	0.4	5	55	13.25	11	2.65
66	P_66	PAU-911	Control	2	2022-07-30	2022-08-20	2022-08-18	19	-2	1	0.39	5	61	14.94	12.2	2.988
67	P_67	PAU-911	Control	3	2022-07-30	2022-08-20	2022-08-18	19	-2	1	0.5	5	57	13.95	11.4	2.79
68	P_68	PAU-911	Control	4	2022-07-30	2022-08-20	2022-08-18	19	-2	1	0.39	5	52	12.64	10.4	2.528
69	P_69	PAU-911	Stress	1	2022-07-30	2022-08-20	2022-08-18	19	-2	1	0.38	5	29	6.67	5.8	1.334
70	P_70	PAU-911	Stress	2	2022-07-30	2022-08-20	2022-08-18	19	-2	1	0.4	5	32	7.35	6.4	1.47
71	P_71	PAU-911	Stress	3	2022-07-30	2022-08-20	2022-08-18	19	-2	1	0.41	5	35	8.16	7	1.632
72	P_72	PAU-911	Stress	4	2022-07-30	2022-08-20	2022-08-18	19	-2	1	0.48	5	37	8.55	7.4	1.71
73	P_73	VC-3960-88	Control	1	2022-07-30	2022-08-20	2022-08-18	19	-2	1	0.39	5	45	10.86	9	2.172
74	P_74	VC-3960-88	Control	2	2022-07-30	2022-08-20	2022-08-18	19	-2	1	0.5	5	52	12.64	10.4	2.528
75	P_75	VC-3960-88	Control	3	2022-07-30	2022-08-20	2022-08-18	19	-2	1	0.46	3	45	10.7	15	3.56667
76	P_76	VC-3960-88	Control	4	2022-07-30	2022-08-20	2022-08-18	19	-2	1	0.42	5	57	13.77	11.4	2.754
77	P_77	VC-3960-88	Stress	1	2022-07-30	2022-08-20	2022-08-18	19	-2	1	0.41	5	28	6.38	5.6	1.276
78	P_78	VC-3960-88	Stress	2	2022-07-30	2022-08-20	2022-08-18	19	-2	1	0.5	5	34	7.89	6.8	1.578
79	P_79	VC-3960-88	Stress	3	2022-07-30	2022-08-20	2022-08-18	19	-2	1	0.39	5	28	6.21	5.6	1.242
80	P_80	VC-3960-88	Stress	4	2022-07-30	2022-08-20	2022-08-18	19	-2	1	0.41	5	32	7.33	6.4	1.466
81	P_81	VC-6372 (45-8-1)	Control	1	2022-07-30	2022-08-20	2022-08-18	19	-2	1	0.37	5	48	11.43	9.6	2.286
82	P_82	VC-6372 (45-8-1)	Control	2	2022-07-30	2022-08-20	2022-08-18	19	-2	1	0.45	5	38	9.02	7.6	1.804
83	P_83	VC-6372 (45-8-1)	Control	3	2022-07-30	2022-08-20	2022-08-18	19	-2	1	0.35	5	47	11.2	9.4	2.24
84	P_84	VC-6372 (45-8-1)	Control	4	2022-07-30	2022-08-20	2022-08-18	19	-2	1	0.48	5	46	10.96	9.2	2.192
85	P_85	VC-6372 (45-8-1)	Stress	1	2022-07-30	2022-08-20	2022-08-18	19	-2	1	0.36	4	30	6.86	7.5	1.715
86	P_86	VC-6372 (45-8-1)	Stress	2	2022-07-30	2022-08-20	2022-08-18	19	-2	1	0.51	4	28	6.29	7	1.5725
87	P_87	VC-6372 (45-8-1)	Stress	3	2022-07-30	2022-08-20	2022-08-18	19	-2	1	0.39	5	35	8.07	7	1.614
88	P_88	VC-6372 (45-8-1)	Stress	4	2022-07-30	2022-08-20	2022-08-18	19	-2	1	0.48	5	31	7.03	6.2	1.406
89	P_89	Vaibhav	Control	1	2022-07-30	2022-08-20	2022-08-18	19	-2	1	0.45	5	40	9.36	8	1.872
90	P_90	Vaibhav	Control	2	2022-07-30	2022-08-20	2022-08-18	19	-2	1	0.48	5	43	10.34	8.6	2.068
91	P_91	Vaibhav	Control	3	2022-07-30	2022-08-20	2022-08-18	19	-2	1	0.34	5	39	9.21	7.8	1.842
92	P_92	Vaibhav	Control	4	2022-07-30	2022-08-20	2022-08-18	19	-2	1	0.35	5	47	11.15	9.4	2.23
93	P_93	Vaibhav	Stress	1	2022-07-30	2022-08-20	2022-08-18	19	-2	1	0.42	5	29	6.48	5.8	1.296
94	P_94	Vaibhav	Stress	2	2022-07-30	2022-08-20	2022-08-18	19	-2	1	0.48	5	23	5	4.6	1
95	P_95	Vaibhav	Stress	3	2022-07-30	2022-08-20	2022-08-18	19	-2	1	0.4	5	24	5.42	4.8	1.084
96	P_96	Vaibhav	Stress	4	2022-07-30	2022-08-20	2022-08-18	19	-2	1	0.47	5	30	6.78	6	1.356
97	P_01	EC-693356	Control	1	2022-07-30	2022-08-20	2022-08-23	24	3	2	0.59
98	P_02	EC-693356	Control	2	2022-07-30	2022-08-20	2022-08-23	24	3	2	0.59
99	P_03	EC-693356	Control	3	2022-07-30	2022-08-20	2022-08-23	24	3	2	0.65
100	P_04	EC-693356	Control	4	2022-07-30	2022-08-20	2022-08-23	24	3	2	0.62
101	P_05	EC-693356	Stress	1	2022-07-30	2022-08-20	2022-08-23	24	3	2	0.57
102	P_06	EC-693356	Stress	2	2022-07-30	2022-08-20	2022-08-23	24	3	2	0.54
103	P_07	EC-693356	Stress	3	2022-07-30	2022-08-20	2022-08-23	24	3	2	0.55
104	P_08	EC-693356	Stress	4	2022-07-30	2022-08-20	2022-08-23	24	3	2	0.51
105	P_09	EC-693357	Control	1	2022-07-30	2022-08-20	2022-08-23	24	3	2	0.49
106	P_10	EC-693357	Control	2	2022-07-30	2022-08-20	2022-08-23	24	3	2	0.6
107	P_11	EC-693357	Control	3	2022-07-30	2022-08-20	2022-08-23	24	3	2	0.53
108	P_12	EC-693357	Control	4	2022-07-30	2022-08-20	2022-08-23	24	3	2	0.6
109	P_13	EC-693357	Stress	1	2022-07-30	2022-08-20	2022-08-23	24	3	2	0.51
110	P_14	EC-693357	Stress	2	2022-07-30	2022-08-20	2022-08-23	24	3	2	0.5
111	P_15	EC-693357	Stress	3	2022-07-30	2022-08-20	2022-08-23	24	3	2	0.48
112	P_16	EC-693357	Stress	4	2022-07-30	2022-08-20	2022-08-23	24	3	2	0.49
113	P_17	EC-693358	Control	1	2022-07-30	2022-08-20	2022-08-23	24	3	2	0.54
114	P_18	EC-693358	Control	2	2022-07-30	2022-08-20	2022-08-23	24	3	2	0.52
115	P_19	EC-693358	Control	3	2022-07-30	2022-08-20	2022-08-23	24	3	2	0.54
116	P_20	EC-693358	Control	4	2022-07-30	2022-08-20	2022-08-23	24	3	2	0.52
117	P_21	EC-693358	Stress	1	2022-07-30	2022-08-20	2022-08-23	24	3	2	0.47
118	P_22	EC-693358	Stress	2	2022-07-30	2022-08-20	2022-08-23	24	3	2	0.48
119	P_23	EC-693358	Stress	3	2022-07-30	2022-08-20	2022-08-23	24	3	2	0.5
120	P_24	EC-693358	Stress	4	2022-07-30	2022-08-20	2022-08-23	24	3	2	0.43
121	P_25	EC-693363	Control	1	2022-07-30	2022-08-20	2022-08-23	24	3	2	0.55
122	P_26	EC-693363	Control	2	2022-07-30	2022-08-20	2022-08-23	24	3	2	0.59
123	P_27	EC-693363	Control	3	2022-07-30	2022-08-20	2022-08-23	24	3	2	0.56
124	P_28	EC-693363	Control	4	2022-07-30	2022-08-20	2022-08-23	24	3	2	0.47
125	P_29	EC-693363	Stress	1	2022-07-30	2022-08-20	2022-08-23	24	3	2	0.51
126	P_30	EC-693363	Stress	2	2022-07-30	2022-08-20	2022-08-23	24	3	2	0.45
127	P_31	EC-693363	Stress	3	2022-07-30	2022-08-20	2022-08-23	24	3	2	0.47
128	P_32	EC-693363	Stress	4	2022-07-30	2022-08-20	2022-08-23	24	3	2	0.42
129	P_33	Harsha	Control	1	2022-07-30	2022-08-20	2022-08-23	24	3	2	0.58
130	P_34	Harsha	Control	2	2022-07-30	2022-08-20	2022-08-23	24	3	2	0.61
131	P_35	Harsha	Control	3	2022-07-30	2022-08-20	2022-08-23	24	3	2	0.59
132	P_36	Harsha	Control	4	2022-07-30	2022-08-20	2022-08-23	24	3	2	0.59
133	P_37	Harsha	Stress	1	2022-07-30	2022-08-20	2022-08-23	24	3	2	0.49
134	P_38	Harsha	Stress	2	2022-07-30	2022-08-20	2022-08-23	24	3	2	0.53
135	P_39	Harsha	Stress	3	2022-07-30	2022-08-20	2022-08-23	24	3	2	0.54
136	P_40	Harsha	Stress	4	2022-07-30	2022-08-20	2022-08-23	24	3	2	0.5
137	P_41	IC-415144	Control	1	2022-07-30	2022-08-20	2022-08-23	24	3	2	0.62
138	P_42	IC-415144	Control	2	2022-07-30	2022-08-20	2022-08-23	24	3	2	0.65
139	P_43	IC-415144	Control	3	2022-07-30	2022-08-20	2022-08-23	24	3	2	0.6
140	P_44	IC-415144	Control	4	2022-07-30	2022-08-20	2022-08-23	24	3	2	0.59
141	P_45	IC-415144	Stress	1	2022-07-30	2022-08-20	2022-08-23	24	3	2	0.58
142	P_46	IC-415144	Stress	2	2022-07-30	2022-08-20	2022-08-23	24	3	2	0.5
143	P_47	IC-415144	Stress	3	2022-07-30	2022-08-20	2022-08-23	24	3	2	0.56
144	P_48	IC-415144	Stress	4	2022-07-30	2022-08-20	2022-08-23	24	3	2	0.5
145	P_49	IPM-205-7	Control	1	2022-07-30	2022-08-20	2022-08-23	24	3	2	0.55
146	P_50	IPM-205-7	Control	2	2022-07-30	2022-08-20	2022-08-23	24	3	2	0.59
147	P_51	IPM-205-7	Control	3	2022-07-30	2022-08-20	2022-08-23	24	3	2	0.56
148	P_52	IPM-205-7	Control	4	2022-07-30	2022-08-20	2022-08-23	24	3	2	0.47
149	P_53	IPM-205-7	Stress	1	2022-07-30	2022-08-20	2022-08-23	24	3	2	0.49
150	P_54	IPM-205-7	Stress	2	2022-07-30	2022-08-20	2022-08-23	24	3	2	0.47
151	P_55	IPM-205-7	Stress	3	2022-07-30	2022-08-20	2022-08-23	24	3	2	0.46
152	P_56	IPM-205-7	Stress	4	2022-07-30	2022-08-20	2022-08-23	24	3	2	0.47
153	P_57	NM-94	Control	1	2022-07-30	2022-08-20	2022-08-23	24	3	2	0.52
154	P_58	NM-94	Control	2	2022-07-30	2022-08-20	2022-08-23	24	3	2	0.6
155	P_59	NM-94	Control	3	2022-07-30	2022-08-20	2022-08-23	24	3	2	0.53
156	P_60	NM-94	Control	4	2022-07-30	2022-08-20	2022-08-23	24	3	2	0.59
157	P_61	NM-94	Stress	1	2022-07-30	2022-08-20	2022-08-23	24	3	2	0.49
158	P_62	NM-94	Stress	2	2022-07-30	2022-08-20	2022-08-23	24	3	2	0.54
159	P_63	NM-94	Stress	3	2022-07-30	2022-08-20	2022-08-23	24	3	2	0.48
160	P_64	NM-94	Stress	4	2022-07-30	2022-08-20	2022-08-23	24	3	2	0.51
161	P_65	PAU-911	Control	1	2022-07-30	2022-08-20	2022-08-23	24	3	2	0.59
162	P_66	PAU-911	Control	2	2022-07-30	2022-08-20	2022-08-23	24	3	2	0.64
163	P_67	PAU-911	Control	3	2022-07-30	2022-08-20	2022-08-23	24	3	2	0.63
164	P_68	PAU-911	Control	4	2022-07-30	2022-08-20	2022-08-23	24	3	2	0.64
165	P_69	PAU-911	Stress	1	2022-07-30	2022-08-20	2022-08-23	24	3	2	0.52
166	P_70	PAU-911	Stress	2	2022-07-30	2022-08-20	2022-08-23	24	3	2	0.5
167	P_71	PAU-911	Stress	3	2022-07-30	2022-08-20	2022-08-23	24	3	2	0.56
168	P_72	PAU-911	Stress	4	2022-07-30	2022-08-20	2022-08-23	24	3	2	0.53
169	P_73	VC-3960-88	Control	1	2022-07-30	2022-08-20	2022-08-23	24	3	2	0.52
170	P_74	VC-3960-88	Control	2	2022-07-30	2022-08-20	2022-08-23	24	3	2	0.61
171	P_75	VC-3960-88	Control	3	2022-07-30	2022-08-20	2022-08-23	24	3	2	0.63
172	P_76	VC-3960-88	Control	4	2022-07-30	2022-08-20	2022-08-23	24	3	2	0.59
173	P_77	VC-3960-88	Stress	1	2022-07-30	2022-08-20	2022-08-23	24	3	2	0.57
174	P_78	VC-3960-88	Stress	2	2022-07-30	2022-08-20	2022-08-23	24	3	2	0.46
175	P_79	VC-3960-88	Stress	3	2022-07-30	2022-08-20	2022-08-23	24	3	2	0.5
176	P_80	VC-3960-88	Stress	4	2022-07-30	2022-08-20	2022-08-23	24	3	2	0.5
177	P_81	VC-6372 (45-8-1)	Control	1	2022-07-30	2022-08-20	2022-08-23	24	3	2	0.59
178	P_82	VC-6372 (45-8-1)	Control	2	2022-07-30	2022-08-20	2022-08-23	24	3	2	0.6
179	P_83	VC-6372 (45-8-1)	Control	3	2022-07-30	2022-08-20	2022-08-23	24	3	2	0.55
180	P_84	VC-6372 (45-8-1)	Control	4	2022-07-30	2022-08-20	2022-08-23	24	3	2	0.52
181	P_85	VC-6372 (45-8-1)	Stress	1	2022-07-30	2022-08-20	2022-08-23	24	3	2	0.49
182	P_86	VC-6372 (45-8-1)	Stress	2	2022-07-30	2022-08-20	2022-08-23	24	3	2	0.5
183	P_87	VC-6372 (45-8-1)	Stress	3	2022-07-30	2022-08-20	2022-08-23	24	3	2	0.52
184	P_88	VC-6372 (45-8-1)	Stress	4	2022-07-30	2022-08-20	2022-08-23	24	3	2	0.48
185	P_89	Vaibhav	Control	1	2022-07-30	2022-08-20	2022-08-23	24	3	2	0.59
186	P_90	Vaibhav	Control	2	2022-07-30	2022-08-20	2022-08-23	24	3	2	0.62
187	P_91	Vaibhav	Control	3	2022-07-30	2022-08-20	2022-08-23	24	3	2	0.58
188	P_92	Vaibhav	Control	4	2022-07-30	2022-08-20	2022-08-23	24	3	2	0.56
189	P_93	Vaibhav	Stress	1	2022-07-30	2022-08-20	2022-08-23	24	3	2	0.49
190	P_94	Vaibhav	Stress	2	2022-07-30	2022-08-20	2022-08-23	24	3	2	0.53
191	P_95	Vaibhav	Stress	3	2022-07-30	2022-08-20	2022-08-23	24	3	2	0.5
192	P_96	Vaibhav	Stress	4	2022-07-30	2022-08-20	2022-08-23	24	3	2	0.56
193	P_01	EC-693356	Control	1	2022-07-30	2022-08-20	2022-08-28	29	8	3	0.6
194	P_02	EC-693356	Control	2	2022-07-30	2022-08-20	2022-08-28	29	8	3	0.65
195	P_03	EC-693356	Control	3	2022-07-30	2022-08-20	2022-08-28	29	8	3	0.68
196	P_04	EC-693356	Control	4	2022-07-30	2022-08-20	2022-08-28	29	8	3	0.69
197	P_05	EC-693356	Stress	1	2022-07-30	2022-08-20	2022-08-28	29	8	3	0.6
198	P_06	EC-693356	Stress	2	2022-07-30	2022-08-20	2022-08-28	29	8	3	0.55
199	P_07	EC-693356	Stress	3	2022-07-30	2022-08-20	2022-08-28	29	8	3	0.56
200	P_08	EC-693356	Stress	4	2022-07-30	2022-08-20	2022-08-28	29	8	3	0.58
201	P_09	EC-693357	Control	1	2022-07-30	2022-08-20	2022-08-28	29	8	3	0.6
202	P_10	EC-693357	Control	2	2022-07-30	2022-08-20	2022-08-28	29	8	3	0.61
203	P_11	EC-693357	Control	3	2022-07-30	2022-08-20	2022-08-28	29	8	3	0.53
204	P_12	EC-693357	Control	4	2022-07-30	2022-08-20	2022-08-28	29	8	3	0.65
205	P_13	EC-693357	Stress	1	2022-07-30	2022-08-20	2022-08-28	29	8	3	0.53
206	P_14	EC-693357	Stress	2	2022-07-30	2022-08-20	2022-08-28	29	8	3	0.59
207	P_15	EC-693357	Stress	3	2022-07-30	2022-08-20	2022-08-28	29	8	3	0.46
208	P_16	EC-693357	Stress	4	2022-07-30	2022-08-20	2022-08-28	29	8	3	0.5
209	P_17	EC-693358	Control	1	2022-07-30	2022-08-20	2022-08-28	29	8	3	0.64
210	P_18	EC-693358	Control	2	2022-07-30	2022-08-20	2022-08-28	29	8	3	0.58
211	P_19	EC-693358	Control	3	2022-07-30	2022-08-20	2022-08-28	29	8	3	0.64
212	P_20	EC-693358	Control	4	2022-07-30	2022-08-20	2022-08-28	29	8	3	0.61
213	P_21	EC-693358	Stress	1	2022-07-30	2022-08-20	2022-08-28	29	8	3	0.53
214	P_22	EC-693358	Stress	2	2022-07-30	2022-08-20	2022-08-28	29	8	3	0.51
215	P_23	EC-693358	Stress	3	2022-07-30	2022-08-20	2022-08-28	29	8	3	0.52
216	P_24	EC-693358	Stress	4	2022-07-30	2022-08-20	2022-08-28	29	8	3	0.5
217	P_25	EC-693363	Control	1	2022-07-30	2022-08-20	2022-08-28	29	8	3	0.56
218	P_26	EC-693363	Control	2	2022-07-30	2022-08-20	2022-08-28	29	8	3	0.58
219	P_27	EC-693363	Control	3	2022-07-30	2022-08-20	2022-08-28	29	8	3	0.6
220	P_28	EC-693363	Control	4	2022-07-30	2022-08-20	2022-08-28	29	8	3	0.61
221	P_29	EC-693363	Stress	1	2022-07-30	2022-08-20	2022-08-28	29	8	3	0.49
222	P_30	EC-693363	Stress	2	2022-07-30	2022-08-20	2022-08-28	29	8	3	0.52
223	P_31	EC-693363	Stress	3	2022-07-30	2022-08-20	2022-08-28	29	8	3	0.54
224	P_32	EC-693363	Stress	4	2022-07-30	2022-08-20	2022-08-28	29	8	3	0.55
225	P_33	Harsha	Control	1	2022-07-30	2022-08-20	2022-08-28	29	8	3	0.64
226	P_34	Harsha	Control	2	2022-07-30	2022-08-20	2022-08-28	29	8	3	0.68
227	P_35	Harsha	Control	3	2022-07-30	2022-08-20	2022-08-28	29	8	3	0.64
228	P_36	Harsha	Control	4	2022-07-30	2022-08-20	2022-08-28	29	8	3	0.62
229	P_37	Harsha	Stress	1	2022-07-30	2022-08-20	2022-08-28	29	8	3	0.53
230	P_38	Harsha	Stress	2	2022-07-30	2022-08-20	2022-08-28	29	8	3	0.51
231	P_39	Harsha	Stress	3	2022-07-30	2022-08-20	2022-08-28	29	8	3	0.56
232	P_40	Harsha	Stress	4	2022-07-30	2022-08-20	2022-08-28	29	8	3	0.59
233	P_41	IC-415144	Control	1	2022-07-30	2022-08-20	2022-08-28	29	8	3	0.61
234	P_42	IC-415144	Control	2	2022-07-30	2022-08-20	2022-08-28	29	8	3	0.69
235	P_43	IC-415144	Control	3	2022-07-30	2022-08-20	2022-08-28	29	8	3	0.67
236	P_44	IC-415144	Control	4	2022-07-30	2022-08-20	2022-08-28	29	8	3	0.68
237	P_45	IC-415144	Stress	1	2022-07-30	2022-08-20	2022-08-28	29	8	3	0.58
238	P_46	IC-415144	Stress	2	2022-07-30	2022-08-20	2022-08-28	29	8	3	0.57
239	P_47	IC-415144	Stress	3	2022-07-30	2022-08-20	2022-08-28	29	8	3	0.6
240	P_48	IC-415144	Stress	4	2022-07-30	2022-08-20	2022-08-28	29	8	3	0.56
241	P_49	IPM-205-7	Control	1	2022-07-30	2022-08-20	2022-08-28	29	8	3	0.61
242	P_50	IPM-205-7	Control	2	2022-07-30	2022-08-20	2022-08-28	29	8	3	0.58
243	P_51	IPM-205-7	Control	3	2022-07-30	2022-08-20	2022-08-28	29	8	3	0.61
244	P_52	IPM-205-7	Control	4	2022-07-30	2022-08-20	2022-08-28	29	8	3	0.62
245	P_53	IPM-205-7	Stress	1	2022-07-30	2022-08-20	2022-08-28	29	8	3	0.49
246	P_54	IPM-205-7	Stress	2	2022-07-30	2022-08-20	2022-08-28	29	8	3	0.48
247	P_55	IPM-205-7	Stress	3	2022-07-30	2022-08-20	2022-08-28	29	8	3	0.52
248	P_56	IPM-205-7	Stress	4	2022-07-30	2022-08-20	2022-08-28	29	8	3	0.51
249	P_57	NM-94	Control	1	2022-07-30	2022-08-20	2022-08-28	29	8	3	0.57
250	P_58	NM-94	Control	2	2022-07-30	2022-08-20	2022-08-28	29	8	3	0.66
251	P_59	NM-94	Control	3	2022-07-30	2022-08-20	2022-08-28	29	8	3	0.59
252	P_60	NM-94	Control	4	2022-07-30	2022-08-20	2022-08-28	29	8	3	0.65
253	P_61	NM-94	Stress	1	2022-07-30	2022-08-20	2022-08-28	29	8	3	0.5
254	P_62	NM-94	Stress	2	2022-07-30	2022-08-20	2022-08-28	29	8	3	0.52
255	P_63	NM-94	Stress	3	2022-07-30	2022-08-20	2022-08-28	29	8	3	0.54
256	P_64	NM-94	Stress	4	2022-07-30	2022-08-20	2022-08-28	29	8	3	0.56
257	P_65	PAU-911	Control	1	2022-07-30	2022-08-20	2022-08-28	29	8	3	0.64
258	P_66	PAU-911	Control	2	2022-07-30	2022-08-20	2022-08-28	29	8	3	0.68
259	P_67	PAU-911	Control	3	2022-07-30	2022-08-20	2022-08-28	29	8	3	0.65
260	P_68	PAU-911	Control	4	2022-07-30	2022-08-20	2022-08-28	29	8	3	0.69
261	P_69	PAU-911	Stress	1	2022-07-30	2022-08-20	2022-08-28	29	8	3	0.56
262	P_70	PAU-911	Stress	2	2022-07-30	2022-08-20	2022-08-28	29	8	3	0.6
263	P_71	PAU-911	Stress	3	2022-07-30	2022-08-20	2022-08-28	29	8	3	0.54
264	P_72	PAU-911	Stress	4	2022-07-30	2022-08-20	2022-08-28	29	8	3	0.56
265	P_73	VC-3960-88	Control	1	2022-07-30	2022-08-20	2022-08-28	29	8	3	0.64
266	P_74	VC-3960-88	Control	2	2022-07-30	2022-08-20	2022-08-28	29	8	3	0.65
267	P_75	VC-3960-88	Control	3	2022-07-30	2022-08-20	2022-08-28	29	8	3	0.62
268	P_76	VC-3960-88	Control	4	2022-07-30	2022-08-20	2022-08-28	29	8	3	0.64
269	P_77	VC-3960-88	Stress	1	2022-07-30	2022-08-20	2022-08-28	29	8	3	0.5
270	P_78	VC-3960-88	Stress	2	2022-07-30	2022-08-20	2022-08-28	29	8	3	0.56
271	P_79	VC-3960-88	Stress	3	2022-07-30	2022-08-20	2022-08-28	29	8	3	0.57
272	P_80	VC-3960-88	Stress	4	2022-07-30	2022-08-20	2022-08-28	29	8	3	0.58
273	P_81	VC-6372 (45-8-1)	Control	1	2022-07-30	2022-08-20	2022-08-28	29	8	3	0.64
274	P_82	VC-6372 (45-8-1)	Control	2	2022-07-30	2022-08-20	2022-08-28	29	8	3	0.62
275	P_83	VC-6372 (45-8-1)	Control	3	2022-07-30	2022-08-20	2022-08-28	29	8	3	0.61
276	P_84	VC-6372 (45-8-1)	Control	4	2022-07-30	2022-08-20	2022-08-28	29	8	3	0.62
277	P_85	VC-6372 (45-8-1)	Stress	1	2022-07-30	2022-08-20	2022-08-28	29	8	3	0.51
278	P_86	VC-6372 (45-8-1)	Stress	2	2022-07-30	2022-08-20	2022-08-28	29	8	3	0.53
279	P_87	VC-6372 (45-8-1)	Stress	3	2022-07-30	2022-08-20	2022-08-28	29	8	3	0.55
280	P_88	VC-6372 (45-8-1)	Stress	4	2022-07-30	2022-08-20	2022-08-28	29	8	3	0.53
281	P_89	Vaibhav	Control	1	2022-07-30	2022-08-20	2022-08-28	29	8	3	0.62
282	P_90	Vaibhav	Control	2	2022-07-30	2022-08-20	2022-08-28	29	8	3	0.69
283	P_91	Vaibhav	Control	3	2022-07-30	2022-08-20	2022-08-28	29	8	3	0.65
284	P_92	Vaibhav	Control	4	2022-07-30	2022-08-20	2022-08-28	29	8	3	0.64
285	P_93	Vaibhav	Stress	1	2022-07-30	2022-08-20	2022-08-28	29	8	3	0.57
286	P_94	Vaibhav	Stress	2	2022-07-30	2022-08-20	2022-08-28	29	8	3	0.59
287	P_95	Vaibhav	Stress	3	2022-07-30	2022-08-20	2022-08-28	29	8	3	0.53
288	P_96	Vaibhav	Stress	4	2022-07-30	2022-08-20	2022-08-28	29	8	3	0.55
289	P_01	EC-693356	Control	1	2022-07-30	2022-08-20	2022-09-03	35	14	4	0.67
290	P_02	EC-693356	Control	2	2022-07-30	2022-08-20	2022-09-03	35	14	4	0.73
291	P_03	EC-693356	Control	3	2022-07-30	2022-08-20	2022-09-03	35	14	4	0.68
292	P_04	EC-693356	Control	4	2022-07-30	2022-08-20	2022-09-03	35	14	4	0.72
293	P_05	EC-693356	Stress	1	2022-07-30	2022-08-20	2022-09-03	35	14	4	0.58
294	P_06	EC-693356	Stress	2	2022-07-30	2022-08-20	2022-09-03	35	14	4	0.54
295	P_07	EC-693356	Stress	3	2022-07-30	2022-08-20	2022-09-03	35	14	4	0.58
296	P_08	EC-693356	Stress	4	2022-07-30	2022-08-20	2022-09-03	35	14	4	0.6
297	P_09	EC-693357	Control	1	2022-07-30	2022-08-20	2022-09-03	35	14	4	0.67
298	P_10	EC-693357	Control	2	2022-07-30	2022-08-20	2022-09-03	35	14	4	0.68
299	P_11	EC-693357	Control	3	2022-07-30	2022-08-20	2022-09-03	35	14	4	0.64
300	P_12	EC-693357	Control	4	2022-07-30	2022-08-20	2022-09-03	35	14	4	0.69
301	P_13	EC-693357	Stress	1	2022-07-30	2022-08-20	2022-09-03	35	14	4	0.54
302	P_14	EC-693357	Stress	2	2022-07-30	2022-08-20	2022-09-03	35	14	4	0.56
303	P_15	EC-693357	Stress	3	2022-07-30	2022-08-20	2022-09-03	35	14	4	0.53
304	P_16	EC-693357	Stress	4	2022-07-30	2022-08-20	2022-09-03	35	14	4	0.54
305	P_17	EC-693358	Control	1	2022-07-30	2022-08-20	2022-09-03	35	14	4	0.64
306	P_18	EC-693358	Control	2	2022-07-30	2022-08-20	2022-09-03	35	14	4	0.63
307	P_19	EC-693358	Control	3	2022-07-30	2022-08-20	2022-09-03	35	14	4	0.63
308	P_20	EC-693358	Control	4	2022-07-30	2022-08-20	2022-09-03	35	14	4	0.61
309	P_21	EC-693358	Stress	1	2022-07-30	2022-08-20	2022-09-03	35	14	4	0.49
310	P_22	EC-693358	Stress	2	2022-07-30	2022-08-20	2022-09-03	35	14	4	0.52
311	P_23	EC-693358	Stress	3	2022-07-30	2022-08-20	2022-09-03	35	14	4	0.52
312	P_24	EC-693358	Stress	4	2022-07-30	2022-08-20	2022-09-03	35	14	4	0.58
313	P_25	EC-693363	Control	1	2022-07-30	2022-08-20	2022-09-03	35	14	4	0.62
314	P_26	EC-693363	Control	2	2022-07-30	2022-08-20	2022-09-03	35	14	4	0.64
315	P_27	EC-693363	Control	3	2022-07-30	2022-08-20	2022-09-03	35	14	4	0.66
316	P_28	EC-693363	Control	4	2022-07-30	2022-08-20	2022-09-03	35	14	4	0.61
317	P_29	EC-693363	Stress	1	2022-07-30	2022-08-20	2022-09-03	35	14	4	0.5
318	P_30	EC-693363	Stress	2	2022-07-30	2022-08-20	2022-09-03	35	14	4	0.59
319	P_31	EC-693363	Stress	3	2022-07-30	2022-08-20	2022-09-03	35	14	4	0.48
320	P_32	EC-693363	Stress	4	2022-07-30	2022-08-20	2022-09-03	35	14	4	0.52
321	P_33	Harsha	Control	1	2022-07-30	2022-08-20	2022-09-03	35	14	4	0.69
322	P_34	Harsha	Control	2	2022-07-30	2022-08-20	2022-09-03	35	14	4	0.68
323	P_35	Harsha	Control	3	2022-07-30	2022-08-20	2022-09-03	35	14	4	0.67
324	P_36	Harsha	Control	4	2022-07-30	2022-08-20	2022-09-03	35	14	4	0.68
325	P_37	Harsha	Stress	1	2022-07-30	2022-08-20	2022-09-03	35	14	4	0.55
326	P_38	Harsha	Stress	2	2022-07-30	2022-08-20	2022-09-03	35	14	4	0.55
327	P_39	Harsha	Stress	3	2022-07-30	2022-08-20	2022-09-03	35	14	4	0.62
328	P_40	Harsha	Stress	4	2022-07-30	2022-08-20	2022-09-03	35	14	4	0.5
329	P_41	IC-415144	Control	1	2022-07-30	2022-08-20	2022-09-03	35	14	4	0.7
330	P_42	IC-415144	Control	2	2022-07-30	2022-08-20	2022-09-03	35	14	4	0.69
331	P_43	IC-415144	Control	3	2022-07-30	2022-08-20	2022-09-03	35	14	4	0.68
332	P_44	IC-415144	Control	4	2022-07-30	2022-08-20	2022-09-03	35	14	4	0.72
333	P_45	IC-415144	Stress	1	2022-07-30	2022-08-20	2022-09-03	35	14	4	0.59
334	P_46	IC-415144	Stress	2	2022-07-30	2022-08-20	2022-09-03	35	14	4	0.57
335	P_47	IC-415144	Stress	3	2022-07-30	2022-08-20	2022-09-03	35	14	4	0.61
336	P_48	IC-415144	Stress	4	2022-07-30	2022-08-20	2022-09-03	35	14	4	0.59
337	P_49	IPM-205-7	Control	1	2022-07-30	2022-08-20	2022-09-03	35	14	4	0.62
338	P_50	IPM-205-7	Control	2	2022-07-30	2022-08-20	2022-09-03	35	14	4	0.64
339	P_51	IPM-205-7	Control	3	2022-07-30	2022-08-20	2022-09-03	35	14	4	0.6
340	P_52	IPM-205-7	Control	4	2022-07-30	2022-08-20	2022-09-03	35	14	4	0.63
341	P_53	IPM-205-7	Stress	1	2022-07-30	2022-08-20	2022-09-03	35	14	4	0.54
342	P_54	IPM-205-7	Stress	2	2022-07-30	2022-08-20	2022-09-03	35	14	4	0.49
343	P_55	IPM-205-7	Stress	3	2022-07-30	2022-08-20	2022-09-03	35	14	4	0.53
344	P_56	IPM-205-7	Stress	4	2022-07-30	2022-08-20	2022-09-03	35	14	4	0.51
345	P_57	NM-94	Control	1	2022-07-30	2022-08-20	2022-09-03	35	14	4	0.68
346	P_58	NM-94	Control	2	2022-07-30	2022-08-20	2022-09-03	35	14	4	0.65
347	P_59	NM-94	Control	3	2022-07-30	2022-08-20	2022-09-03	35	14	4	0.63
348	P_60	NM-94	Control	4	2022-07-30	2022-08-20	2022-09-03	35	14	4	0.66
349	P_61	NM-94	Stress	1	2022-07-30	2022-08-20	2022-09-03	35	14	4	0.55
350	P_62	NM-94	Stress	2	2022-07-30	2022-08-20	2022-09-03	35	14	4	0.57
351	P_63	NM-94	Stress	3	2022-07-30	2022-08-20	2022-09-03	35	14	4	0.56
352	P_64	NM-94	Stress	4	2022-07-30	2022-08-20	2022-09-03	35	14	4	0.55
353	P_65	PAU-911	Control	1	2022-07-30	2022-08-20	2022-09-03	35	14	4	0.69
354	P_66	PAU-911	Control	2	2022-07-30	2022-08-20	2022-09-03	35	14	4	0.72
355	P_67	PAU-911	Control	3	2022-07-30	2022-08-20	2022-09-03	35	14	4	0.69
356	P_68	PAU-911	Control	4	2022-07-30	2022-08-20	2022-09-03	35	14	4	0.72
357	P_69	PAU-911	Stress	1	2022-07-30	2022-08-20	2022-09-03	35	14	4	0.59
358	P_70	PAU-911	Stress	2	2022-07-30	2022-08-20	2022-09-03	35	14	4	0.58
359	P_71	PAU-911	Stress	3	2022-07-30	2022-08-20	2022-09-03	35	14	4	0.59
360	P_72	PAU-911	Stress	4	2022-07-30	2022-08-20	2022-09-03	35	14	4	0.58
361	P_73	VC-3960-88	Control	1	2022-07-30	2022-08-20	2022-09-03	35	14	4	0.68
362	P_74	VC-3960-88	Control	2	2022-07-30	2022-08-20	2022-09-03	35	14	4	0.67
363	P_75	VC-3960-88	Control	3	2022-07-30	2022-08-20	2022-09-03	35	14	4	0.69
364	P_76	VC-3960-88	Control	4	2022-07-30	2022-08-20	2022-09-03	35	14	4	0.66
365	P_77	VC-3960-88	Stress	1	2022-07-30	2022-08-20	2022-09-03	35	14	4	0.54
366	P_78	VC-3960-88	Stress	2	2022-07-30	2022-08-20	2022-09-03	35	14	4	0.51
367	P_79	VC-3960-88	Stress	3	2022-07-30	2022-08-20	2022-09-03	35	14	4	0.61
368	P_80	VC-3960-88	Stress	4	2022-07-30	2022-08-20	2022-09-03	35	14	4	0.58
369	P_81	VC-6372 (45-8-1)	Control	1	2022-07-30	2022-08-20	2022-09-03	35	14	4	0.64
370	P_82	VC-6372 (45-8-1)	Control	2	2022-07-30	2022-08-20	2022-09-03	35	14	4	0.69
371	P_83	VC-6372 (45-8-1)	Control	3	2022-07-30	2022-08-20	2022-09-03	35	14	4	0.65
372	P_84	VC-6372 (45-8-1)	Control	4	2022-07-30	2022-08-20	2022-09-03	35	14	4	0.68
373	P_85	VC-6372 (45-8-1)	Stress	1	2022-07-30	2022-08-20	2022-09-03	35	14	4	0.52
374	P_86	VC-6372 (45-8-1)	Stress	2	2022-07-30	2022-08-20	2022-09-03	35	14	4	0.54
375	P_87	VC-6372 (45-8-1)	Stress	3	2022-07-30	2022-08-20	2022-09-03	35	14	4	0.6
376	P_88	VC-6372 (45-8-1)	Stress	4	2022-07-30	2022-08-20	2022-09-03	35	14	4	0.51
377	P_89	Vaibhav	Control	1	2022-07-30	2022-08-20	2022-09-03	35	14	4	0.66
378	P_90	Vaibhav	Control	2	2022-07-30	2022-08-20	2022-09-03	35	14	4	0.72
379	P_91	Vaibhav	Control	3	2022-07-30	2022-08-20	2022-09-03	35	14	4	0.66
380	P_92	Vaibhav	Control	4	2022-07-30	2022-08-20	2022-09-03	35	14	4	0.68
381	P_93	Vaibhav	Stress	1	2022-07-30	2022-08-20	2022-09-03	35	14	4	0.56
382	P_94	Vaibhav	Stress	2	2022-07-30	2022-08-20	2022-09-03	35	14	4	0.58
383	P_95	Vaibhav	Stress	3	2022-07-30	2022-08-20	2022-09-03	35	14	4	0.53
384	P_96	Vaibhav	Stress	4	2022-07-30	2022-08-20	2022-09-03	35	14	4	0.58
385	P_01	EC-693356	Control	1	2022-07-30	2022-08-20	2022-09-08	40	19	5	0.73
386	P_02	EC-693356	Control	2	2022-07-30	2022-08-20	2022-09-08	40	19	5	0.74
387	P_03	EC-693356	Control	3	2022-07-30	2022-08-20	2022-09-08	40	19	5	0.71
388	P_04	EC-693356	Control	4	2022-07-30	2022-08-20	2022-09-08	40	19	5	0.73
389	P_05	EC-693356	Stress	1	2022-07-30	2022-08-20	2022-09-08	40	19	5	0.62
390	P_06	EC-693356	Stress	2	2022-07-30	2022-08-20	2022-09-08	40	19	5	0.64
391	P_07	EC-693356	Stress	3	2022-07-30	2022-08-20	2022-09-08	40	19	5	0.61
392	P_08	EC-693356	Stress	4	2022-07-30	2022-08-20	2022-09-08	40	19	5	0.59
393	P_09	EC-693357	Control	1	2022-07-30	2022-08-20	2022-09-08	40	19	5	0.69
394	P_10	EC-693357	Control	2	2022-07-30	2022-08-20	2022-09-08	40	19	5	0.73
395	P_11	EC-693357	Control	3	2022-07-30	2022-08-20	2022-09-08	40	19	5	0.68
396	P_12	EC-693357	Control	4	2022-07-30	2022-08-20	2022-09-08	40	19	5	0.68
397	P_13	EC-693357	Stress	1	2022-07-30	2022-08-20	2022-09-08	40	19	5	0.57
398	P_14	EC-693357	Stress	2	2022-07-30	2022-08-20	2022-09-08	40	19	5	0.61
399	P_15	EC-693357	Stress	3	2022-07-30	2022-08-20	2022-09-08	40	19	5	0.58
400	P_16	EC-693357	Stress	4	2022-07-30	2022-08-20	2022-09-08	40	19	5	0.63
401	P_17	EC-693358	Control	1	2022-07-30	2022-08-20	2022-09-08	40	19	5	0.62
402	P_18	EC-693358	Control	2	2022-07-30	2022-08-20	2022-09-08	40	19	5	0.63
403	P_19	EC-693358	Control	3	2022-07-30	2022-08-20	2022-09-08	40	19	5	0.66
404	P_20	EC-693358	Control	4	2022-07-30	2022-08-20	2022-09-08	40	19	5	0.65
405	P_21	EC-693358	Stress	1	2022-07-30	2022-08-20	2022-09-08	40	19	5	0.56
406	P_22	EC-693358	Stress	2	2022-07-30	2022-08-20	2022-09-08	40	19	5	0.58
407	P_23	EC-693358	Stress	3	2022-07-30	2022-08-20	2022-09-08	40	19	5	0.59
408	P_24	EC-693358	Stress	4	2022-07-30	2022-08-20	2022-09-08	40	19	5	0.5
409	P_25	EC-693363	Control	1	2022-07-30	2022-08-20	2022-09-08	40	19	5	0.65
410	P_26	EC-693363	Control	2	2022-07-30	2022-08-20	2022-09-08	40	19	5	0.66
411	P_27	EC-693363	Control	3	2022-07-30	2022-08-20	2022-09-08	40	19	5	0.64
412	P_28	EC-693363	Control	4	2022-07-30	2022-08-20	2022-09-08	40	19	5	0.59
413	P_29	EC-693363	Stress	1	2022-07-30	2022-08-20	2022-09-08	40	19	5	0.52
414	P_30	EC-693363	Stress	2	2022-07-30	2022-08-20	2022-09-08	40	19	5	0.56
415	P_31	EC-693363	Stress	3	2022-07-30	2022-08-20	2022-09-08	40	19	5	0.55
416	P_32	EC-693363	Stress	4	2022-07-30	2022-08-20	2022-09-08	40	19	5	0.6
417	P_33	Harsha	Control	1	2022-07-30	2022-08-20	2022-09-08	40	19	5	0.71
418	P_34	Harsha	Control	2	2022-07-30	2022-08-20	2022-09-08	40	19	5	0.7
419	P_35	Harsha	Control	3	2022-07-30	2022-08-20	2022-09-08	40	19	5	0.67
420	P_36	Harsha	Control	4	2022-07-30	2022-08-20	2022-09-08	40	19	5	0.67
421	P_37	Harsha	Stress	1	2022-07-30	2022-08-20	2022-09-08	40	19	5	0.6
422	P_38	Harsha	Stress	2	2022-07-30	2022-08-20	2022-09-08	40	19	5	0.63
423	P_39	Harsha	Stress	3	2022-07-30	2022-08-20	2022-09-08	40	19	5	0.55
424	P_40	Harsha	Stress	4	2022-07-30	2022-08-20	2022-09-08	40	19	5	0.6
425	P_41	IC-415144	Control	1	2022-07-30	2022-08-20	2022-09-08	40	19	5	0.72
426	P_42	IC-415144	Control	2	2022-07-30	2022-08-20	2022-09-08	40	19	5	0.75
427	P_43	IC-415144	Control	3	2022-07-30	2022-08-20	2022-09-08	40	19	5	0.74
428	P_44	IC-415144	Control	4	2022-07-30	2022-08-20	2022-09-08	40	19	5	0.74
429	P_45	IC-415144	Stress	1	2022-07-30	2022-08-20	2022-09-08	40	19	5	0.62
430	P_46	IC-415144	Stress	2	2022-07-30	2022-08-20	2022-09-08	40	19	5	0.62
431	P_47	IC-415144	Stress	3	2022-07-30	2022-08-20	2022-09-08	40	19	5	0.58
432	P_48	IC-415144	Stress	4	2022-07-30	2022-08-20	2022-09-08	40	19	5	0.59
433	P_49	IPM-205-7	Control	1	2022-07-30	2022-08-20	2022-09-08	40	19	5	0.63
434	P_50	IPM-205-7	Control	2	2022-07-30	2022-08-20	2022-09-08	40	19	5	0.63
435	P_51	IPM-205-7	Control	3	2022-07-30	2022-08-20	2022-09-08	40	19	5	0.65
436	P_52	IPM-205-7	Control	4	2022-07-30	2022-08-20	2022-09-08	40	19	5	0.66
437	P_53	IPM-205-7	Stress	1	2022-07-30	2022-08-20	2022-09-08	40	19	5	0.55
438	P_54	IPM-205-7	Stress	2	2022-07-30	2022-08-20	2022-09-08	40	19	5	0.57
439	P_55	IPM-205-7	Stress	3	2022-07-30	2022-08-20	2022-09-08	40	19	5	0.53
440	P_56	IPM-205-7	Stress	4	2022-07-30	2022-08-20	2022-09-08	40	19	5	0.51
441	P_57	NM-94	Control	1	2022-07-30	2022-08-20	2022-09-08	40	19	5	0.67
442	P_58	NM-94	Control	2	2022-07-30	2022-08-20	2022-09-08	40	19	5	0.66
443	P_59	NM-94	Control	3	2022-07-30	2022-08-20	2022-09-08	40	19	5	0.65
444	P_60	NM-94	Control	4	2022-07-30	2022-08-20	2022-09-08	40	19	5	0.72
445	P_61	NM-94	Stress	1	2022-07-30	2022-08-20	2022-09-08	40	19	5	0.59
446	P_62	NM-94	Stress	2	2022-07-30	2022-08-20	2022-09-08	40	19	5	0.6
447	P_63	NM-94	Stress	3	2022-07-30	2022-08-20	2022-09-08	40	19	5	0.62
448	P_64	NM-94	Stress	4	2022-07-30	2022-08-20	2022-09-08	40	19	5	0.54
449	P_65	PAU-911	Control	1	2022-07-30	2022-08-20	2022-09-08	40	19	5	0.74
450	P_66	PAU-911	Control	2	2022-07-30	2022-08-20	2022-09-08	40	19	5	0.77
451	P_67	PAU-911	Control	3	2022-07-30	2022-08-20	2022-09-08	40	19	5	0.75
452	P_68	PAU-911	Control	4	2022-07-30	2022-08-20	2022-09-08	40	19	5	0.74
453	P_69	PAU-911	Stress	1	2022-07-30	2022-08-20	2022-09-08	40	19	5	0.62
454	P_70	PAU-911	Stress	2	2022-07-30	2022-08-20	2022-09-08	40	19	5	0.61
455	P_71	PAU-911	Stress	3	2022-07-30	2022-08-20	2022-09-08	40	19	5	0.64
456	P_72	PAU-911	Stress	4	2022-07-30	2022-08-20	2022-09-08	40	19	5	0.6
457	P_73	VC-3960-88	Control	1	2022-07-30	2022-08-20	2022-09-08	40	19	5	0.71
458	P_74	VC-3960-88	Control	2	2022-07-30	2022-08-20	2022-09-08	40	19	5	0.7
459	P_75	VC-3960-88	Control	3	2022-07-30	2022-08-20	2022-09-08	40	19	5	0.69
460	P_76	VC-3960-88	Control	4	2022-07-30	2022-08-20	2022-09-08	40	19	5	0.72
461	P_77	VC-3960-88	Stress	1	2022-07-30	2022-08-20	2022-09-08	40	19	5	0.57
462	P_78	VC-3960-88	Stress	2	2022-07-30	2022-08-20	2022-09-08	40	19	5	0.65
463	P_79	VC-3960-88	Stress	3	2022-07-30	2022-08-20	2022-09-08	40	19	5	0.59
464	P_80	VC-3960-88	Stress	4	2022-07-30	2022-08-20	2022-09-08	40	19	5	0.63
465	P_81	VC-6372 (45-8-1)	Control	1	2022-07-30	2022-08-20	2022-09-08	40	19	5	0.62
466	P_82	VC-6372 (45-8-1)	Control	2	2022-07-30	2022-08-20	2022-09-08	40	19	5	0.72
467	P_83	VC-6372 (45-8-1)	Control	3	2022-07-30	2022-08-20	2022-09-08	40	19	5	0.65
468	P_84	VC-6372 (45-8-1)	Control	4	2022-07-30	2022-08-20	2022-09-08	40	19	5	0.73
469	P_85	VC-6372 (45-8-1)	Stress	1	2022-07-30	2022-08-20	2022-09-08	40	19	5	0.59
470	P_86	VC-6372 (45-8-1)	Stress	2	2022-07-30	2022-08-20	2022-09-08	40	19	5	0.63
471	P_87	VC-6372 (45-8-1)	Stress	3	2022-07-30	2022-08-20	2022-09-08	40	19	5	0.57
472	P_88	VC-6372 (45-8-1)	Stress	4	2022-07-30	2022-08-20	2022-09-08	40	19	5	0.54
473	P_89	Vaibhav	Control	1	2022-07-30	2022-08-20	2022-09-08	40	19	5	0.68
474	P_90	Vaibhav	Control	2	2022-07-30	2022-08-20	2022-09-08	40	19	5	0.68
475	P_91	Vaibhav	Control	3	2022-07-30	2022-08-20	2022-09-08	40	19	5	0.7
476	P_92	Vaibhav	Control	4	2022-07-30	2022-08-20	2022-09-08	40	19	5	0.74
477	P_93	Vaibhav	Stress	1	2022-07-30	2022-08-20	2022-09-08	40	19	5	0.51
478	P_94	Vaibhav	Stress	2	2022-07-30	2022-08-20	2022-09-08	40	19	5	0.62
479	P_95	Vaibhav	Stress	3	2022-07-30	2022-08-20	2022-09-08	40	19	5	0.62
480	P_96	Vaibhav	Stress	4	2022-07-30	2022-08-20	2022-09-08	40	19	5	0.65
481	P_01	EC-693356	Control	1	2022-07-30	2022-08-20	2022-09-13	45	24	6	0.74
482	P_02	EC-693356	Control	2	2022-07-30	2022-08-20	2022-09-13	45	24	6	0.69
483	P_03	EC-693356	Control	3	2022-07-30	2022-08-20	2022-09-13	45	24	6	0.75
484	P_04	EC-693356	Control	4	2022-07-30	2022-08-20	2022-09-13	45	24	6	0.71
485	P_05	EC-693356	Stress	1	2022-07-30	2022-08-20	2022-09-13	45	24	6	0.59
486	P_06	EC-693356	Stress	2	2022-07-30	2022-08-20	2022-09-13	45	24	6	0.58
487	P_07	EC-693356	Stress	3	2022-07-30	2022-08-20	2022-09-13	45	24	6	0.59
488	P_08	EC-693356	Stress	4	2022-07-30	2022-08-20	2022-09-13	45	24	6	0.62
489	P_09	EC-693357	Control	1	2022-07-30	2022-08-20	2022-09-13	45	24	6	0.63
490	P_10	EC-693357	Control	2	2022-07-30	2022-08-20	2022-09-13	45	24	6	0.67
491	P_11	EC-693357	Control	3	2022-07-30	2022-08-20	2022-09-13	45	24	6	0.62
492	P_12	EC-693357	Control	4	2022-07-30	2022-08-20	2022-09-13	45	24	6	0.59
493	P_13	EC-693357	Stress	1	2022-07-30	2022-08-20	2022-09-13	45	24	6	0.53
494	P_14	EC-693357	Stress	2	2022-07-30	2022-08-20	2022-09-13	45	24	6	0.52
495	P_15	EC-693357	Stress	3	2022-07-30	2022-08-20	2022-09-13	45	24	6	0.63
496	P_16	EC-693357	Stress	4	2022-07-30	2022-08-20	2022-09-13	45	24	6	0.52
497	P_17	EC-693358	Control	1	2022-07-30	2022-08-20	2022-09-13	45	24	6	0.6
498	P_18	EC-693358	Control	2	2022-07-30	2022-08-20	2022-09-13	45	24	6	0.57
499	P_19	EC-693358	Control	3	2022-07-30	2022-08-20	2022-09-13	45	24	6	0.66
500	P_20	EC-693358	Control	4	2022-07-30	2022-08-20	2022-09-13	45	24	6	0.55
501	P_21	EC-693358	Stress	1	2022-07-30	2022-08-20	2022-09-13	45	24	6	0.6
502	P_22	EC-693358	Stress	2	2022-07-30	2022-08-20	2022-09-13	45	24	6	0.52
503	P_23	EC-693358	Stress	3	2022-07-30	2022-08-20	2022-09-13	45	24	6	0.53
504	P_24	EC-693358	Stress	4	2022-07-30	2022-08-20	2022-09-13	45	24	6	0.45
505	P_25	EC-693363	Control	1	2022-07-30	2022-08-20	2022-09-13	45	24	6	0.64
506	P_26	EC-693363	Control	2	2022-07-30	2022-08-20	2022-09-13	45	24	6	0.61
507	P_27	EC-693363	Control	3	2022-07-30	2022-08-20	2022-09-13	45	24	6	0.62
508	P_28	EC-693363	Control	4	2022-07-30	2022-08-20	2022-09-13	45	24	6	0.6
509	P_29	EC-693363	Stress	1	2022-07-30	2022-08-20	2022-09-13	45	24	6	0.51
510	P_30	EC-693363	Stress	2	2022-07-30	2022-08-20	2022-09-13	45	24	6	0.53
511	P_31	EC-693363	Stress	3	2022-07-30	2022-08-20	2022-09-13	45	24	6	0.54
512	P_32	EC-693363	Stress	4	2022-07-30	2022-08-20	2022-09-13	45	24	6	0.5
513	P_33	Harsha	Control	1	2022-07-30	2022-08-20	2022-09-13	45	24	6	0.67
514	P_34	Harsha	Control	2	2022-07-30	2022-08-20	2022-09-13	45	24	6	0.69
515	P_35	Harsha	Control	3	2022-07-30	2022-08-20	2022-09-13	45	24	6	0.68
516	P_36	Harsha	Control	4	2022-07-30	2022-08-20	2022-09-13	45	24	6	0.66
517	P_37	Harsha	Stress	1	2022-07-30	2022-08-20	2022-09-13	45	24	6	0.58
518	P_38	Harsha	Stress	2	2022-07-30	2022-08-20	2022-09-13	45	24	6	0.53
519	P_39	Harsha	Stress	3	2022-07-30	2022-08-20	2022-09-13	45	24	6	0.55
520	P_40	Harsha	Stress	4	2022-07-30	2022-08-20	2022-09-13	45	24	6	0.59
521	P_41	IC-415144	Control	1	2022-07-30	2022-08-20	2022-09-13	45	24	6	0.73
522	P_42	IC-415144	Control	2	2022-07-30	2022-08-20	2022-09-13	45	24	6	0.69
523	P_43	IC-415144	Control	3	2022-07-30	2022-08-20	2022-09-13	45	24	6	0.72
524	P_44	IC-415144	Control	4	2022-07-30	2022-08-20	2022-09-13	45	24	6	0.69
525	P_45	IC-415144	Stress	1	2022-07-30	2022-08-20	2022-09-13	45	24	6	0.6
526	P_46	IC-415144	Stress	2	2022-07-30	2022-08-20	2022-09-13	45	24	6	0.59
527	P_47	IC-415144	Stress	3	2022-07-30	2022-08-20	2022-09-13	45	24	6	0.57
528	P_48	IC-415144	Stress	4	2022-07-30	2022-08-20	2022-09-13	45	24	6	0.61
529	P_49	IPM-205-7	Control	1	2022-07-30	2022-08-20	2022-09-13	45	24	6	0.63
530	P_50	IPM-205-7	Control	2	2022-07-30	2022-08-20	2022-09-13	45	24	6	0.63
531	P_51	IPM-205-7	Control	3	2022-07-30	2022-08-20	2022-09-13	45	24	6	0.65
532	P_52	IPM-205-7	Control	4	2022-07-30	2022-08-20	2022-09-13	45	24	6	0.55
533	P_53	IPM-205-7	Stress	1	2022-07-30	2022-08-20	2022-09-13	45	24	6	0.5
534	P_54	IPM-205-7	Stress	2	2022-07-30	2022-08-20	2022-09-13	45	24	6	0.53
535	P_55	IPM-205-7	Stress	3	2022-07-30	2022-08-20	2022-09-13	45	24	6	0.54
536	P_56	IPM-205-7	Stress	4	2022-07-30	2022-08-20	2022-09-13	45	24	6	0.52
537	P_57	NM-94	Control	1	2022-07-30	2022-08-20	2022-09-13	45	24	6	0.62
538	P_58	NM-94	Control	2	2022-07-30	2022-08-20	2022-09-13	45	24	6	0.63
539	P_59	NM-94	Control	3	2022-07-30	2022-08-20	2022-09-13	45	24	6	0.64
540	P_60	NM-94	Control	4	2022-07-30	2022-08-20	2022-09-13	45	24	6	0.65
541	P_61	NM-94	Stress	1	2022-07-30	2022-08-20	2022-09-13	45	24	6	0.57
542	P_62	NM-94	Stress	2	2022-07-30	2022-08-20	2022-09-13	45	24	6	0.55
543	P_63	NM-94	Stress	3	2022-07-30	2022-08-20	2022-09-13	45	24	6	0.53
544	P_64	NM-94	Stress	4	2022-07-30	2022-08-20	2022-09-13	45	24	6	0.55
545	P_65	PAU-911	Control	1	2022-07-30	2022-08-20	2022-09-13	45	24	6	0.68
546	P_66	PAU-911	Control	2	2022-07-30	2022-08-20	2022-09-13	45	24	6	0.7
547	P_67	PAU-911	Control	3	2022-07-30	2022-08-20	2022-09-13	45	24	6	0.73
548	P_68	PAU-911	Control	4	2022-07-30	2022-08-20	2022-09-13	45	24	6	0.75
549	P_69	PAU-911	Stress	1	2022-07-30	2022-08-20	2022-09-13	45	24	6	0.61
550	P_70	PAU-911	Stress	2	2022-07-30	2022-08-20	2022-09-13	45	24	6	0.62
551	P_71	PAU-911	Stress	3	2022-07-30	2022-08-20	2022-09-13	45	24	6	0.56
552	P_72	PAU-911	Stress	4	2022-07-30	2022-08-20	2022-09-13	45	24	6	0.56
553	P_73	VC-3960-88	Control	1	2022-07-30	2022-08-20	2022-09-13	45	24	6	0.65
554	P_74	VC-3960-88	Control	2	2022-07-30	2022-08-20	2022-09-13	45	24	6	0.7
555	P_75	VC-3960-88	Control	3	2022-07-30	2022-08-20	2022-09-13	45	24	6	0.68
556	P_76	VC-3960-88	Control	4	2022-07-30	2022-08-20	2022-09-13	45	24	6	0.63
557	P_77	VC-3960-88	Stress	1	2022-07-30	2022-08-20	2022-09-13	45	24	6	0.55
558	P_78	VC-3960-88	Stress	2	2022-07-30	2022-08-20	2022-09-13	45	24	6	0.58
559	P_79	VC-3960-88	Stress	3	2022-07-30	2022-08-20	2022-09-13	45	24	6	0.59
560	P_80	VC-3960-88	Stress	4	2022-07-30	2022-08-20	2022-09-13	45	24	6	0.58
561	P_81	VC-6372 (45-8-1)	Control	1	2022-07-30	2022-08-20	2022-09-13	45	24	6	0.67
562	P_82	VC-6372 (45-8-1)	Control	2	2022-07-30	2022-08-20	2022-09-13	45	24	6	0.65
563	P_83	VC-6372 (45-8-1)	Control	3	2022-07-30	2022-08-20	2022-09-13	45	24	6	0.62
564	P_84	VC-6372 (45-8-1)	Control	4	2022-07-30	2022-08-20	2022-09-13	45	24	6	0.59
565	P_85	VC-6372 (45-8-1)	Stress	1	2022-07-30	2022-08-20	2022-09-13	45	24	6	0.53
566	P_86	VC-6372 (45-8-1)	Stress	2	2022-07-30	2022-08-20	2022-09-13	45	24	6	0.56
567	P_87	VC-6372 (45-8-1)	Stress	3	2022-07-30	2022-08-20	2022-09-13	45	24	6	0.57
568	P_88	VC-6372 (45-8-1)	Stress	4	2022-07-30	2022-08-20	2022-09-13	45	24	6	0.57
569	P_89	Vaibhav	Control	1	2022-07-30	2022-08-20	2022-09-13	45	24	6	0.69
570	P_90	Vaibhav	Control	2	2022-07-30	2022-08-20	2022-09-13	45	24	6	0.72
571	P_91	Vaibhav	Control	3	2022-07-30	2022-08-20	2022-09-13	45	24	6	0.64
572	P_92	Vaibhav	Control	4	2022-07-30	2022-08-20	2022-09-13	45	24	6	0.65
573	P_93	Vaibhav	Stress	1	2022-07-30	2022-08-20	2022-09-13	45	24	6	0.51
574	P_94	Vaibhav	Stress	2	2022-07-30	2022-08-20	2022-09-13	45	24	6	0.6
575	P_95	Vaibhav	Stress	3	2022-07-30	2022-08-20	2022-09-13	45	24	6	0.6
576	P_96	Vaibhav	Stress	4	2022-07-30	2022-08-20	2022-09-13	45	24	6	0.56
577	P_01	EC-693356	Control	1	2022-07-30	2022-08-20	2022-09-18	50	29	7	0.68
578	P_02	EC-693356	Control	2	2022-07-30	2022-08-20	2022-09-18	50	29	7	0.67
579	P_03	EC-693356	Control	3	2022-07-30	2022-08-20	2022-09-18	50	29	7	0.64
580	P_04	EC-693356	Control	4	2022-07-30	2022-08-20	2022-09-18	50	29	7	0.71
581	P_05	EC-693356	Stress	1	2022-07-30	2022-08-20	2022-09-18	50	29	7	0.58
582	P_06	EC-693356	Stress	2	2022-07-30	2022-08-20	2022-09-18	50	29	7	0.55
583	P_07	EC-693356	Stress	3	2022-07-30	2022-08-20	2022-09-18	50	29	7	0.6
584	P_08	EC-693356	Stress	4	2022-07-30	2022-08-20	2022-09-18	50	29	7	0.53
585	P_09	EC-693357	Control	1	2022-07-30	2022-08-20	2022-09-18	50	29	7	0.63
586	P_10	EC-693357	Control	2	2022-07-30	2022-08-20	2022-09-18	50	29	7	0.6
587	P_11	EC-693357	Control	3	2022-07-30	2022-08-20	2022-09-18	50	29	7	0.62
588	P_12	EC-693357	Control	4	2022-07-30	2022-08-20	2022-09-18	50	29	7	0.54
589	P_13	EC-693357	Stress	1	2022-07-30	2022-08-20	2022-09-18	50	29	7	0.52
590	P_14	EC-693357	Stress	2	2022-07-30	2022-08-20	2022-09-18	50	29	7	0.55
591	P_15	EC-693357	Stress	3	2022-07-30	2022-08-20	2022-09-18	50	29	7	0.48
592	P_16	EC-693357	Stress	4	2022-07-30	2022-08-20	2022-09-18	50	29	7	0.46
593	P_17	EC-693358	Control	1	2022-07-30	2022-08-20	2022-09-18	50	29	7	0.53
594	P_18	EC-693358	Control	2	2022-07-30	2022-08-20	2022-09-18	50	29	7	0.56
595	P_19	EC-693358	Control	3	2022-07-30	2022-08-20	2022-09-18	50	29	7	0.6
596	P_20	EC-693358	Control	4	2022-07-30	2022-08-20	2022-09-18	50	29	7	0.52
597	P_21	EC-693358	Stress	1	2022-07-30	2022-08-20	2022-09-18	50	29	7	0.43
598	P_22	EC-693358	Stress	2	2022-07-30	2022-08-20	2022-09-18	50	29	7	0.51
599	P_23	EC-693358	Stress	3	2022-07-30	2022-08-20	2022-09-18	50	29	7	0.46
600	P_24	EC-693358	Stress	4	2022-07-30	2022-08-20	2022-09-18	50	29	7	0.43
601	P_25	EC-693363	Control	1	2022-07-30	2022-08-20	2022-09-18	50	29	7	0.56
602	P_26	EC-693363	Control	2	2022-07-30	2022-08-20	2022-09-18	50	29	7	0.61
603	P_27	EC-693363	Control	3	2022-07-30	2022-08-20	2022-09-18	50	29	7	0.51
604	P_28	EC-693363	Control	4	2022-07-30	2022-08-20	2022-09-18	50	29	7	0.54
605	P_29	EC-693363	Stress	1	2022-07-30	2022-08-20	2022-09-18	50	29	7	0.47
606	P_30	EC-693363	Stress	2	2022-07-30	2022-08-20	2022-09-18	50	29	7	0.43
607	P_31	EC-693363	Stress	3	2022-07-30	2022-08-20	2022-09-18	50	29	7	0.48
608	P_32	EC-693363	Stress	4	2022-07-30	2022-08-20	2022-09-18	50	29	7	0.51
609	P_33	Harsha	Control	1	2022-07-30	2022-08-20	2022-09-18	50	29	7	0.66
610	P_34	Harsha	Control	2	2022-07-30	2022-08-20	2022-09-18	50	29	7	0.63
611	P_35	Harsha	Control	3	2022-07-30	2022-08-20	2022-09-18	50	29	7	0.69
612	P_36	Harsha	Control	4	2022-07-30	2022-08-20	2022-09-18	50	29	7	0.59
613	P_37	Harsha	Stress	1	2022-07-30	2022-08-20	2022-09-18	50	29	7	0.53
614	P_38	Harsha	Stress	2	2022-07-30	2022-08-20	2022-09-18	50	29	7	0.55
615	P_39	Harsha	Stress	3	2022-07-30	2022-08-20	2022-09-18	50	29	7	0.5
616	P_40	Harsha	Stress	4	2022-07-30	2022-08-20	2022-09-18	50	29	7	0.56
617	P_41	IC-415144	Control	1	2022-07-30	2022-08-20	2022-09-18	50	29	7	0.66
618	P_42	IC-415144	Control	2	2022-07-30	2022-08-20	2022-09-18	50	29	7	0.68
619	P_43	IC-415144	Control	3	2022-07-30	2022-08-20	2022-09-18	50	29	7	0.71
620	P_44	IC-415144	Control	4	2022-07-30	2022-08-20	2022-09-18	50	29	7	0.63
621	P_45	IC-415144	Stress	1	2022-07-30	2022-08-20	2022-09-18	50	29	7	0.53
622	P_46	IC-415144	Stress	2	2022-07-30	2022-08-20	2022-09-18	50	29	7	0.59
623	P_47	IC-415144	Stress	3	2022-07-30	2022-08-20	2022-09-18	50	29	7	0.62
624	P_48	IC-415144	Stress	4	2022-07-30	2022-08-20	2022-09-18	50	29	7	0.56
625	P_49	IPM-205-7	Control	1	2022-07-30	2022-08-20	2022-09-18	50	29	7	0.53
626	P_50	IPM-205-7	Control	2	2022-07-30	2022-08-20	2022-09-18	50	29	7	0.58
627	P_51	IPM-205-7	Control	3	2022-07-30	2022-08-20	2022-09-18	50	29	7	0.57
628	P_52	IPM-205-7	Control	4	2022-07-30	2022-08-20	2022-09-18	50	29	7	0.53
629	P_53	IPM-205-7	Stress	1	2022-07-30	2022-08-20	2022-09-18	50	29	7	0.47
630	P_54	IPM-205-7	Stress	2	2022-07-30	2022-08-20	2022-09-18	50	29	7	0.44
631	P_55	IPM-205-7	Stress	3	2022-07-30	2022-08-20	2022-09-18	50	29	7	0.48
632	P_56	IPM-205-7	Stress	4	2022-07-30	2022-08-20	2022-09-18	50	29	7	0.49
633	P_57	NM-94	Control	1	2022-07-30	2022-08-20	2022-09-18	50	29	7	0.6
634	P_58	NM-94	Control	2	2022-07-30	2022-08-20	2022-09-18	50	29	7	0.62
635	P_59	NM-94	Control	3	2022-07-30	2022-08-20	2022-09-18	50	29	7	0.61
636	P_60	NM-94	Control	4	2022-07-30	2022-08-20	2022-09-18	50	29	7	0.59
637	P_61	NM-94	Stress	1	2022-07-30	2022-08-20	2022-09-18	50	29	7	0.49
638	P_62	NM-94	Stress	2	2022-07-30	2022-08-20	2022-09-18	50	29	7	0.52
639	P_63	NM-94	Stress	3	2022-07-30	2022-08-20	2022-09-18	50	29	7	0.5
640	P_64	NM-94	Stress	4	2022-07-30	2022-08-20	2022-09-18	50	29	7	0.48
641	P_65	PAU-911	Control	1	2022-07-30	2022-08-20	2022-09-18	50	29	7	0.67
642	P_66	PAU-911	Control	2	2022-07-30	2022-08-20	2022-09-18	50	29	7	0.68
643	P_67	PAU-911	Control	3	2022-07-30	2022-08-20	2022-09-18	50	29	7	0.71
644	P_68	PAU-911	Control	4	2022-07-30	2022-08-20	2022-09-18	50	29	7	0.62
645	P_69	PAU-911	Stress	1	2022-07-30	2022-08-20	2022-09-18	50	29	7	0.59
646	P_70	PAU-911	Stress	2	2022-07-30	2022-08-20	2022-09-18	50	29	7	0.57
647	P_71	PAU-911	Stress	3	2022-07-30	2022-08-20	2022-09-18	50	29	7	0.58
648	P_72	PAU-911	Stress	4	2022-07-30	2022-08-20	2022-09-18	50	29	7	0.56
649	P_73	VC-3960-88	Control	1	2022-07-30	2022-08-20	2022-09-18	50	29	7	0.66
650	P_74	VC-3960-88	Control	2	2022-07-30	2022-08-20	2022-09-18	50	29	7	0.6
651	P_75	VC-3960-88	Control	3	2022-07-30	2022-08-20	2022-09-18	50	29	7	0.62
652	P_76	VC-3960-88	Control	4	2022-07-30	2022-08-20	2022-09-18	50	29	7	0.63
653	P_77	VC-3960-88	Stress	1	2022-07-30	2022-08-20	2022-09-18	50	29	7	0.54
654	P_78	VC-3960-88	Stress	2	2022-07-30	2022-08-20	2022-09-18	50	29	7	0.51
655	P_79	VC-3960-88	Stress	3	2022-07-30	2022-08-20	2022-09-18	50	29	7	0.57
656	P_80	VC-3960-88	Stress	4	2022-07-30	2022-08-20	2022-09-18	50	29	7	0.53
657	P_81	VC-6372 (45-8-1)	Control	1	2022-07-30	2022-08-20	2022-09-18	50	29	7	0.6
658	P_82	VC-6372 (45-8-1)	Control	2	2022-07-30	2022-08-20	2022-09-18	50	29	7	0.64
659	P_83	VC-6372 (45-8-1)	Control	3	2022-07-30	2022-08-20	2022-09-18	50	29	7	0.61
660	P_84	VC-6372 (45-8-1)	Control	4	2022-07-30	2022-08-20	2022-09-18	50	29	7	0.52
661	P_85	VC-6372 (45-8-1)	Stress	1	2022-07-30	2022-08-20	2022-09-18	50	29	7	0.54
662	P_86	VC-6372 (45-8-1)	Stress	2	2022-07-30	2022-08-20	2022-09-18	50	29	7	0.52
663	P_87	VC-6372 (45-8-1)	Stress	3	2022-07-30	2022-08-20	2022-09-18	50	29	7	0.46
664	P_88	VC-6372 (45-8-1)	Stress	4	2022-07-30	2022-08-20	2022-09-18	50	29	7	0.53
665	P_89	Vaibhav	Control	1	2022-07-30	2022-08-20	2022-09-18	50	29	7	0.62
666	P_90	Vaibhav	Control	2	2022-07-30	2022-08-20	2022-09-18	50	29	7	0.7
667	P_91	Vaibhav	Control	3	2022-07-30	2022-08-20	2022-09-18	50	29	7	0.63
668	P_92	Vaibhav	Control	4	2022-07-30	2022-08-20	2022-09-18	50	29	7	0.61
669	P_93	Vaibhav	Stress	1	2022-07-30	2022-08-20	2022-09-18	50	29	7	0.58
670	P_94	Vaibhav	Stress	2	2022-07-30	2022-08-20	2022-09-18	50	29	7	0.52
671	P_95	Vaibhav	Stress	3	2022-07-30	2022-08-20	2022-09-18	50	29	7	0.59
672	P_96	Vaibhav	Stress	4	2022-07-30	2022-08-20	2022-09-18	50	29	7	0.5
673	P_01	EC-693356	Control	1	2022-07-30	2022-08-20	2022-09-23	55	34	8	0.65
674	P_02	EC-693356	Control	2	2022-07-30	2022-08-20	2022-09-23	55	34	8	0.64
675	P_03	EC-693356	Control	3	2022-07-30	2022-08-20	2022-09-23	55	34	8	0.62
676	P_04	EC-693356	Control	4	2022-07-30	2022-08-20	2022-09-23	55	34	8	0.6
677	P_05	EC-693356	Stress	1	2022-07-30	2022-08-20	2022-09-23	55	34	8	0.52
678	P_06	EC-693356	Stress	2	2022-07-30	2022-08-20	2022-09-23	55	34	8	0.56
679	P_07	EC-693356	Stress	3	2022-07-30	2022-08-20	2022-09-23	55	34	8	0.53
680	P_08	EC-693356	Stress	4	2022-07-30	2022-08-20	2022-09-23	55	34	8	0.54
681	P_09	EC-693357	Control	1	2022-07-30	2022-08-20	2022-09-23	55	34	8	0.59
682	P_10	EC-693357	Control	2	2022-07-30	2022-08-20	2022-09-23	55	34	8	0.54
683	P_11	EC-693357	Control	3	2022-07-30	2022-08-20	2022-09-23	55	34	8	0.62
684	P_12	EC-693357	Control	4	2022-07-30	2022-08-20	2022-09-23	55	34	8	0.53
685	P_13	EC-693357	Stress	1	2022-07-30	2022-08-20	2022-09-23	55	34	8	0.46
686	P_14	EC-693357	Stress	2	2022-07-30	2022-08-20	2022-09-23	55	34	8	0.51
687	P_15	EC-693357	Stress	3	2022-07-30	2022-08-20	2022-09-23	55	34	8	0.5
688	P_16	EC-693357	Stress	4	2022-07-30	2022-08-20	2022-09-23	55	34	8	0.41
689	P_17	EC-693358	Control	1	2022-07-30	2022-08-20	2022-09-23	55	34	8	0.55
690	P_18	EC-693358	Control	2	2022-07-30	2022-08-20	2022-09-23	55	34	8	0.54
691	P_19	EC-693358	Control	3	2022-07-30	2022-08-20	2022-09-23	55	34	8	0.5
692	P_20	EC-693358	Control	4	2022-07-30	2022-08-20	2022-09-23	55	34	8	0.48
693	P_21	EC-693358	Stress	1	2022-07-30	2022-08-20	2022-09-23	55	34	8	0.42
694	P_22	EC-693358	Stress	2	2022-07-30	2022-08-20	2022-09-23	55	34	8	0.48
695	P_23	EC-693358	Stress	3	2022-07-30	2022-08-20	2022-09-23	55	34	8	0.5
696	P_24	EC-693358	Stress	4	2022-07-30	2022-08-20	2022-09-23	55	34	8	0.43
697	P_25	EC-693363	Control	1	2022-07-30	2022-08-20	2022-09-23	55	34	8	0.51
698	P_26	EC-693363	Control	2	2022-07-30	2022-08-20	2022-09-23	55	34	8	0.48
699	P_27	EC-693363	Control	3	2022-07-30	2022-08-20	2022-09-23	55	34	8	0.52
700	P_28	EC-693363	Control	4	2022-07-30	2022-08-20	2022-09-23	55	34	8	0.53
701	P_29	EC-693363	Stress	1	2022-07-30	2022-08-20	2022-09-23	55	34	8	0.42
702	P_30	EC-693363	Stress	2	2022-07-30	2022-08-20	2022-09-23	55	34	8	0.48
703	P_31	EC-693363	Stress	3	2022-07-30	2022-08-20	2022-09-23	55	34	8	0.44
704	P_32	EC-693363	Stress	4	2022-07-30	2022-08-20	2022-09-23	55	34	8	0.5
705	P_33	Harsha	Control	1	2022-07-30	2022-08-20	2022-09-23	55	34	8	0.6
706	P_34	Harsha	Control	2	2022-07-30	2022-08-20	2022-09-23	55	34	8	0.57
707	P_35	Harsha	Control	3	2022-07-30	2022-08-20	2022-09-23	55	34	8	0.63
708	P_36	Harsha	Control	4	2022-07-30	2022-08-20	2022-09-23	55	34	8	0.59
709	P_37	Harsha	Stress	1	2022-07-30	2022-08-20	2022-09-23	55	34	8	0.47
710	P_38	Harsha	Stress	2	2022-07-30	2022-08-20	2022-09-23	55	34	8	0.53
711	P_39	Harsha	Stress	3	2022-07-30	2022-08-20	2022-09-23	55	34	8	0.54
712	P_40	Harsha	Stress	4	2022-07-30	2022-08-20	2022-09-23	55	34	8	0.51
713	P_41	IC-415144	Control	1	2022-07-30	2022-08-20	2022-09-23	55	34	8	0.61
714	P_42	IC-415144	Control	2	2022-07-30	2022-08-20	2022-09-23	55	34	8	0.65
715	P_43	IC-415144	Control	3	2022-07-30	2022-08-20	2022-09-23	55	34	8	0.66
716	P_44	IC-415144	Control	4	2022-07-30	2022-08-20	2022-09-23	55	34	8	0.62
717	P_45	IC-415144	Stress	1	2022-07-30	2022-08-20	2022-09-23	55	34	8	0.57
718	P_46	IC-415144	Stress	2	2022-07-30	2022-08-20	2022-09-23	55	34	8	0.53
719	P_47	IC-415144	Stress	3	2022-07-30	2022-08-20	2022-09-23	55	34	8	0.57
720	P_48	IC-415144	Stress	4	2022-07-30	2022-08-20	2022-09-23	55	34	8	0.53
721	P_49	IPM-205-7	Control	1	2022-07-30	2022-08-20	2022-09-23	55	34	8	0.52
722	P_50	IPM-205-7	Control	2	2022-07-30	2022-08-20	2022-09-23	55	34	8	0.48
723	P_51	IPM-205-7	Control	3	2022-07-30	2022-08-20	2022-09-23	55	34	8	0.54
724	P_52	IPM-205-7	Control	4	2022-07-30	2022-08-20	2022-09-23	55	34	8	0.49
725	P_53	IPM-205-7	Stress	1	2022-07-30	2022-08-20	2022-09-23	55	34	8	0.43
726	P_54	IPM-205-7	Stress	2	2022-07-30	2022-08-20	2022-09-23	55	34	8	0.45
727	P_55	IPM-205-7	Stress	3	2022-07-30	2022-08-20	2022-09-23	55	34	8	0.44
728	P_56	IPM-205-7	Stress	4	2022-07-30	2022-08-20	2022-09-23	55	34	8	0.42
729	P_57	NM-94	Control	1	2022-07-30	2022-08-20	2022-09-23	55	34	8	0.57
730	P_58	NM-94	Control	2	2022-07-30	2022-08-20	2022-09-23	55	34	8	0.6
731	P_59	NM-94	Control	3	2022-07-30	2022-08-20	2022-09-23	55	34	8	0.54
732	P_60	NM-94	Control	4	2022-07-30	2022-08-20	2022-09-23	55	34	8	0.52
733	P_61	NM-94	Stress	1	2022-07-30	2022-08-20	2022-09-23	55	34	8	0.44
734	P_62	NM-94	Stress	2	2022-07-30	2022-08-20	2022-09-23	55	34	8	0.49
735	P_63	NM-94	Stress	3	2022-07-30	2022-08-20	2022-09-23	55	34	8	0.51
736	P_64	NM-94	Stress	4	2022-07-30	2022-08-20	2022-09-23	55	34	8	0.43
737	P_65	PAU-911	Control	1	2022-07-30	2022-08-20	2022-09-23	55	34	8	0.65
738	P_66	PAU-911	Control	2	2022-07-30	2022-08-20	2022-09-23	55	34	8	0.65
739	P_67	PAU-911	Control	3	2022-07-30	2022-08-20	2022-09-23	55	34	8	0.67
740	P_68	PAU-911	Control	4	2022-07-30	2022-08-20	2022-09-23	55	34	8	0.62
741	P_69	PAU-911	Stress	1	2022-07-30	2022-08-20	2022-09-23	55	34	8	0.53
742	P_70	PAU-911	Stress	2	2022-07-30	2022-08-20	2022-09-23	55	34	8	0.56
743	P_71	PAU-911	Stress	3	2022-07-30	2022-08-20	2022-09-23	55	34	8	0.52
744	P_72	PAU-911	Stress	4	2022-07-30	2022-08-20	2022-09-23	55	34	8	0.53
745	P_73	VC-3960-88	Control	1	2022-07-30	2022-08-20	2022-09-23	55	34	8	0.59
746	P_74	VC-3960-88	Control	2	2022-07-30	2022-08-20	2022-09-23	55	34	8	0.62
747	P_75	VC-3960-88	Control	3	2022-07-30	2022-08-20	2022-09-23	55	34	8	0.6
748	P_76	VC-3960-88	Control	4	2022-07-30	2022-08-20	2022-09-23	55	34	8	0.64
749	P_77	VC-3960-88	Stress	1	2022-07-30	2022-08-20	2022-09-23	55	34	8	0.51
750	P_78	VC-3960-88	Stress	2	2022-07-30	2022-08-20	2022-09-23	55	34	8	0.54
751	P_79	VC-3960-88	Stress	3	2022-07-30	2022-08-20	2022-09-23	55	34	8	0.52
752	P_80	VC-3960-88	Stress	4	2022-07-30	2022-08-20	2022-09-23	55	34	8	0.47
753	P_81	VC-6372 (45-8-1)	Control	1	2022-07-30	2022-08-20	2022-09-23	55	34	8	0.57
754	P_82	VC-6372 (45-8-1)	Control	2	2022-07-30	2022-08-20	2022-09-23	55	34	8	0.6
755	P_83	VC-6372 (45-8-1)	Control	3	2022-07-30	2022-08-20	2022-09-23	55	34	8	0.54
756	P_84	VC-6372 (45-8-1)	Control	4	2022-07-30	2022-08-20	2022-09-23	55	34	8	0.57
757	P_85	VC-6372 (45-8-1)	Stress	1	2022-07-30	2022-08-20	2022-09-23	55	34	8	0.45
758	P_86	VC-6372 (45-8-1)	Stress	2	2022-07-30	2022-08-20	2022-09-23	55	34	8	0.44
759	P_87	VC-6372 (45-8-1)	Stress	3	2022-07-30	2022-08-20	2022-09-23	55	34	8	0.53
760	P_88	VC-6372 (45-8-1)	Stress	4	2022-07-30	2022-08-20	2022-09-23	55	34	8	0.49
761	P_89	Vaibhav	Control	1	2022-07-30	2022-08-20	2022-09-23	55	34	8	0.62
762	P_90	Vaibhav	Control	2	2022-07-30	2022-08-20	2022-09-23	55	34	8	0.57
763	P_91	Vaibhav	Control	3	2022-07-30	2022-08-20	2022-09-23	55	34	8	0.56
764	P_92	Vaibhav	Control	4	2022-07-30	2022-08-20	2022-09-23	55	34	8	0.65
765	P_93	Vaibhav	Stress	1	2022-07-30	2022-08-20	2022-09-23	55	34	8	0.49
766	P_94	Vaibhav	Stress	2	2022-07-30	2022-08-20	2022-09-23	55	34	8	0.54
767	P_95	Vaibhav	Stress	3	2022-07-30	2022-08-20	2022-09-23	55	34	8	0.48
768	P_96	Vaibhav	Stress	4	2022-07-30	2022-08-20	2022-09-23	55	34	8	0.5
769	P_01	EC-693356	Control	1	2022-07-30	2022-08-20	2022-09-28	60	39	9	0.57
770	P_02	EC-693356	Control	2	2022-07-30	2022-08-20	2022-09-28	60	39	9	0.6
771	P_03	EC-693356	Control	3	2022-07-30	2022-08-20	2022-09-28	60	39	9	0.64
772	P_04	EC-693356	Control	4	2022-07-30	2022-08-20	2022-09-28	60	39	9	0.62
773	P_05	EC-693356	Stress	1	2022-07-30	2022-08-20	2022-09-28	60	39	9	0.53
774	P_06	EC-693356	Stress	2	2022-07-30	2022-08-20	2022-09-28	60	39	9	0.6
775	P_07	EC-693356	Stress	3	2022-07-30	2022-08-20	2022-09-28	60	39	9	0.54
776	P_08	EC-693356	Stress	4	2022-07-30	2022-08-20	2022-09-28	60	39	9	0.57
777	P_09	EC-693357	Control	1	2022-07-30	2022-08-20	2022-09-28	60	39	9	0.52
778	P_10	EC-693357	Control	2	2022-07-30	2022-08-20	2022-09-28	60	39	9	0.6
779	P_11	EC-693357	Control	3	2022-07-30	2022-08-20	2022-09-28	60	39	9	0.5
780	P_12	EC-693357	Control	4	2022-07-30	2022-08-20	2022-09-28	60	39	9	0.49
781	P_13	EC-693357	Stress	1	2022-07-30	2022-08-20	2022-09-28	60	39	9	0.47
782	P_14	EC-693357	Stress	2	2022-07-30	2022-08-20	2022-09-28	60	39	9	0.44
783	P_15	EC-693357	Stress	3	2022-07-30	2022-08-20	2022-09-28	60	39	9	0.5
784	P_16	EC-693357	Stress	4	2022-07-30	2022-08-20	2022-09-28	60	39	9	0.46
785	P_17	EC-693358	Control	1	2022-07-30	2022-08-20	2022-09-28	60	39	9	0.47
786	P_18	EC-693358	Control	2	2022-07-30	2022-08-20	2022-09-28	60	39	9	0.5
787	P_19	EC-693358	Control	3	2022-07-30	2022-08-20	2022-09-28	60	39	9	0.45
788	P_20	EC-693358	Control	4	2022-07-30	2022-08-20	2022-09-28	60	39	9	0.52
789	P_21	EC-693358	Stress	1	2022-07-30	2022-08-20	2022-09-28	60	39	9	0.38
790	P_22	EC-693358	Stress	2	2022-07-30	2022-08-20	2022-09-28	60	39	9	0.42
791	P_23	EC-693358	Stress	3	2022-07-30	2022-08-20	2022-09-28	60	39	9	0.37
792	P_24	EC-693358	Stress	4	2022-07-30	2022-08-20	2022-09-28	60	39	9	0.46
793	P_25	EC-693363	Control	1	2022-07-30	2022-08-20	2022-09-28	60	39	9	0.42
794	P_26	EC-693363	Control	2	2022-07-30	2022-08-20	2022-09-28	60	39	9	0.5
795	P_27	EC-693363	Control	3	2022-07-30	2022-08-20	2022-09-28	60	39	9	0.46
796	P_28	EC-693363	Control	4	2022-07-30	2022-08-20	2022-09-28	60	39	9	0.54
797	P_29	EC-693363	Stress	1	2022-07-30	2022-08-20	2022-09-28	60	39	9	0.43
798	P_30	EC-693363	Stress	2	2022-07-30	2022-08-20	2022-09-28	60	39	9	0.46
799	P_31	EC-693363	Stress	3	2022-07-30	2022-08-20	2022-09-28	60	39	9	0.39
800	P_32	EC-693363	Stress	4	2022-07-30	2022-08-20	2022-09-28	60	39	9	0.4
801	P_33	Harsha	Control	1	2022-07-30	2022-08-20	2022-09-28	60	39	9	0.52
802	P_34	Harsha	Control	2	2022-07-30	2022-08-20	2022-09-28	60	39	9	0.59
803	P_35	Harsha	Control	3	2022-07-30	2022-08-20	2022-09-28	60	39	9	0.6
804	P_36	Harsha	Control	4	2022-07-30	2022-08-20	2022-09-28	60	39	9	0.53
805	P_37	Harsha	Stress	1	2022-07-30	2022-08-20	2022-09-28	60	39	9	0.44
806	P_38	Harsha	Stress	2	2022-07-30	2022-08-20	2022-09-28	60	39	9	0.53
807	P_39	Harsha	Stress	3	2022-07-30	2022-08-20	2022-09-28	60	39	9	0.52
808	P_40	Harsha	Stress	4	2022-07-30	2022-08-20	2022-09-28	60	39	9	0.49
809	P_41	IC-415144	Control	1	2022-07-30	2022-08-20	2022-09-28	60	39	9	0.6
810	P_42	IC-415144	Control	2	2022-07-30	2022-08-20	2022-09-28	60	39	9	0.64
811	P_43	IC-415144	Control	3	2022-07-30	2022-08-20	2022-09-28	60	39	9	0.62
812	P_44	IC-415144	Control	4	2022-07-30	2022-08-20	2022-09-28	60	39	9	0.63
813	P_45	IC-415144	Stress	1	2022-07-30	2022-08-20	2022-09-28	60	39	9	0.6
814	P_46	IC-415144	Stress	2	2022-07-30	2022-08-20	2022-09-28	60	39	9	0.61
815	P_47	IC-415144	Stress	3	2022-07-30	2022-08-20	2022-09-28	60	39	9	0.53
816	P_48	IC-415144	Stress	4	2022-07-30	2022-08-20	2022-09-28	60	39	9	0.55
817	P_49	IPM-205-7	Control	1	2022-07-30	2022-08-20	2022-09-28	60	39	9	0.43
818	P_50	IPM-205-7	Control	2	2022-07-30	2022-08-20	2022-09-28	60	39	9	0.47
819	P_51	IPM-205-7	Control	3	2022-07-30	2022-08-20	2022-09-28	60	39	9	0.5
820	P_52	IPM-205-7	Control	4	2022-07-30	2022-08-20	2022-09-28	60	39	9	0.48
821	P_53	IPM-205-7	Stress	1	2022-07-30	2022-08-20	2022-09-28	60	39	9	0.36
822	P_54	IPM-205-7	Stress	2	2022-07-30	2022-08-20	2022-09-28	60	39	9	0.45
823	P_55	IPM-205-7	Stress	3	2022-07-30	2022-08-20	2022-09-28	60	39	9	0.37
824	P_56	IPM-205-7	Stress	4	2022-07-30	2022-08-20	2022-09-28	60	39	9	0.42
825	P_57	NM-94	Control	1	2022-07-30	2022-08-20	2022-09-28	60	39	9	0.6
826	P_58	NM-94	Control	2	2022-07-30	2022-08-20	2022-09-28	60	39	9	0.57
827	P_59	NM-94	Control	3	2022-07-30	2022-08-20	2022-09-28	60	39	9	0.54
828	P_60	NM-94	Control	4	2022-07-30	2022-08-20	2022-09-28	60	39	9	0.44
829	P_61	NM-94	Stress	1	2022-07-30	2022-08-20	2022-09-28	60	39	9	0.42
830	P_62	NM-94	Stress	2	2022-07-30	2022-08-20	2022-09-28	60	39	9	0.5
831	P_63	NM-94	Stress	3	2022-07-30	2022-08-20	2022-09-28	60	39	9	0.43
832	P_64	NM-94	Stress	4	2022-07-30	2022-08-20	2022-09-28	60	39	9	0.49
833	P_65	PAU-911	Control	1	2022-07-30	2022-08-20	2022-09-28	60	39	9	0.57
834	P_66	PAU-911	Control	2	2022-07-30	2022-08-20	2022-09-28	60	39	9	0.61
835	P_67	PAU-911	Control	3	2022-07-30	2022-08-20	2022-09-28	60	39	9	0.64
836	P_68	PAU-911	Control	4	2022-07-30	2022-08-20	2022-09-28	60	39	9	0.58
837	P_69	PAU-911	Stress	1	2022-07-30	2022-08-20	2022-09-28	60	39	9	0.52
838	P_70	PAU-911	Stress	2	2022-07-30	2022-08-20	2022-09-28	60	39	9	0.6
839	P_71	PAU-911	Stress	3	2022-07-30	2022-08-20	2022-09-28	60	39	9	0.51
840	P_72	PAU-911	Stress	4	2022-07-30	2022-08-20	2022-09-28	60	39	9	0.57
841	P_73	VC-3960-88	Control	1	2022-07-30	2022-08-20	2022-09-28	60	39	9	0.55
842	P_74	VC-3960-88	Control	2	2022-07-30	2022-08-20	2022-09-28	60	39	9	0.61
843	P_75	VC-3960-88	Control	3	2022-07-30	2022-08-20	2022-09-28	60	39	9	0.57
844	P_76	VC-3960-88	Control	4	2022-07-30	2022-08-20	2022-09-28	60	39	9	0.52
845	P_77	VC-3960-88	Stress	1	2022-07-30	2022-08-20	2022-09-28	60	39	9	0.52
846	P_78	VC-3960-88	Stress	2	2022-07-30	2022-08-20	2022-09-28	60	39	9	0.48
847	P_79	VC-3960-88	Stress	3	2022-07-30	2022-08-20	2022-09-28	60	39	9	0.51
848	P_80	VC-3960-88	Stress	4	2022-07-30	2022-08-20	2022-09-28	60	39	9	0.45
849	P_81	VC-6372 (45-8-1)	Control	1	2022-07-30	2022-08-20	2022-09-28	60	39	9	0.6
850	P_82	VC-6372 (45-8-1)	Control	2	2022-07-30	2022-08-20	2022-09-28	60	39	9	0.54
851	P_83	VC-6372 (45-8-1)	Control	3	2022-07-30	2022-08-20	2022-09-28	60	39	9	0.6
852	P_84	VC-6372 (45-8-1)	Control	4	2022-07-30	2022-08-20	2022-09-28	60	39	9	0.42
853	P_85	VC-6372 (45-8-1)	Stress	1	2022-07-30	2022-08-20	2022-09-28	60	39	9	0.43
854	P_86	VC-6372 (45-8-1)	Stress	2	2022-07-30	2022-08-20	2022-09-28	60	39	9	0.48
855	P_87	VC-6372 (45-8-1)	Stress	3	2022-07-30	2022-08-20	2022-09-28	60	39	9	0.49
856	P_88	VC-6372 (45-8-1)	Stress	4	2022-07-30	2022-08-20	2022-09-28	60	39	9	0.42
857	P_89	Vaibhav	Control	1	2022-07-30	2022-08-20	2022-09-28	60	39	9	0.56
858	P_90	Vaibhav	Control	2	2022-07-30	2022-08-20	2022-09-28	60	39	9	0.62
859	P_91	Vaibhav	Control	3	2022-07-30	2022-08-20	2022-09-28	60	39	9	0.61
860	P_92	Vaibhav	Control	4	2022-07-30	2022-08-20	2022-09-28	60	39	9	0.48
861	P_93	Vaibhav	Stress	1	2022-07-30	2022-08-20	2022-09-28	60	39	9	0.48
862	P_94	Vaibhav	Stress	2	2022-07-30	2022-08-20	2022-09-28	60	39	9	0.52
863	P_95	Vaibhav	Stress	3	2022-07-30	2022-08-20	2022-09-28	60	39	9	0.51
864	P_96	Vaibhav	Stress	4	2022-07-30	2022-08-20	2022-09-28	60	39	9	0.53

## Sheet: ChlContent
Sr. No.	PotID	Genotype	Water treatment	Rep	Sub Rep	DoS	DoSI	DoObs	DAS	DASI	OD @ 645nm	OD @ 665nm	Chl A	Chl B	Total Chl
1	P_01	EC-693356	Control	4	1	2022-07-30	2022-08-20	2022-08-20	21	0	0.045	0.172	0.38	0.03	0.41
2	P_02	EC-693356	Control	4	2	2022-07-30	2022-08-20	2022-08-20	21	0	0.047	0.18	0.4	0.03	0.43
3	P_03	EC-693356	Control	4	3	2022-07-30	2022-08-20	2022-08-20	21	0	0.058	0.136	0.29	0.11	0.4
4	P_04	EC-693356	Control	4	4	2022-07-30	2022-08-20	2022-08-20	21	0	0.042	0.169	0.38	0.02	0.4
5	P_05	EC-693356	Stress	4	1	2022-07-30	2022-08-20	2022-08-20	21	0	0.052	0.136	0.3	0.09	0.39
6	P_06	EC-693356	Stress	4	2	2022-07-30	2022-08-20	2022-08-20	21	0	0.067	0.127	0.27	0.15	0.42
7	P_07	EC-693356	Stress	4	3	2022-07-30	2022-08-20	2022-08-20	21	0	0.077	0.123	0.25	0.19	0.44
8	P_08	EC-693356	Stress	4	4	2022-07-30	2022-08-20	2022-08-20	21	0	0.029	0.137	0.31	0	0.31
9	P_09	EC-693357	Control	4	1	2022-07-30	2022-08-20	2022-08-20	21	0	0.039	0.154	0.34	0.02	0.36
10	P_10	EC-693357	Control	4	2	2022-07-30	2022-08-20	2022-08-20	21	0	0.045	0.161	0.36	0.04	0.4
11	P_11	EC-693357	Control	4	3	2022-07-30	2022-08-20	2022-08-20	21	0	0.054	0.166	0.36	0.07	0.43
12	P_12	EC-693357	Control	4	4	2022-07-30	2022-08-20	2022-08-20	21	0	0.036	0.151	0.34	0.02	0.36
13	P_13	EC-693357	Stress	4	1	2022-07-30	2022-08-20	2022-08-20	21	0	0.046	0.147	0.32	0.06	0.38
14	P_14	EC-693357	Stress	4	2	2022-07-30	2022-08-20	2022-08-20	21	0	0.032	0.154	0.35	0	0.35
15	P_15	EC-693357	Stress	4	3	2022-07-30	2022-08-20	2022-08-20	21	0	0.071	0.119	0.25	0.17	0.42
16	P_16	EC-693357	Stress	4	4	2022-07-30	2022-08-20	2022-08-20	21	0	0.073	0.105	0.21	0.19	0.4
17	P_17	EC-693358	Control	4	1	2022-07-30	2022-08-20	2022-08-20	21	0	0.064	0.112	0.23	0.15	0.38
18	P_18	EC-693358	Control	4	2	2022-07-30	2022-08-20	2022-08-20	21	0	0.059	0.148	0.32	0.1	0.42
19	P_19	EC-693358	Control	4	3	2022-07-30	2022-08-20	2022-08-20	21	0	0.068	0.133	0.28	0.15	0.43
20	P_20	EC-693358	Control	4	4	2022-07-30	2022-08-20	2022-08-20	21	0	0.07	0.119	0.25	0.17	0.42
21	P_21	EC-693358	Stress	4	1	2022-07-30	2022-08-20	2022-08-20	21	0	0.061	0.136	0.29	0.12	0.41
22	P_22	EC-693358	Stress	4	2	2022-07-30	2022-08-20	2022-08-20	21	0	0.057	0.142	0.31	0.1	0.41
23	P_23	EC-693358	Stress	4	3	2022-07-30	2022-08-20	2022-08-20	21	0	0.035	0.147	0.33	0.02	0.35
24	P_24	EC-693358	Stress	4	4	2022-07-30	2022-08-20	2022-08-20	21	0	0.047	0.133	0.29	0.07	0.36
25	P_25	EC-693363	Control	4	1	2022-07-30	2022-08-20	2022-08-20	21	0	0.059	0.13	0.28	0.12	0.4
26	P_26	EC-693363	Control	4	2	2022-07-30	2022-08-20	2022-08-20	21	0	0.055	0.136	0.29	0.1	0.39
27	P_27	EC-693363	Control	4	3	2022-07-30	2022-08-20	2022-08-20	21	0	0.063	0.141	0.3	0.13	0.43
28	P_28	EC-693363	Control	4	4	2022-07-30	2022-08-20	2022-08-20	21	0	0.064	0.128	0.27	0.14	0.41
29	P_29	EC-693363	Stress	4	1	2022-07-30	2022-08-20	2022-08-20	21	0	0.074	0.113	0.23	0.19	0.42
30	P_30	EC-693363	Stress	4	2	2022-07-30	2022-08-20	2022-08-20	21	0	0.069	0.101	0.2	0.18	0.38
31	P_31	EC-693363	Stress	4	3	2022-07-30	2022-08-20	2022-08-20	21	0	0.078	0.117	0.24	0.2	0.44
32	P_32	EC-693363	Stress	4	4	2022-07-30	2022-08-20	2022-08-20	21	0	0.08	0.101	0.2	0.22	0.42
33	P_33	Harsha	Control	4	1	2022-07-30	2022-08-20	2022-08-20	21	0	0.051	0.152	0.33	0.07	0.4
34	P_34	Harsha	Control	4	2	2022-07-30	2022-08-20	2022-08-20	21	0	0.036	0.159	0.36	0.01	0.37
35	P_35	Harsha	Control	4	3	2022-07-30	2022-08-20	2022-08-20	21	0	0.055	0.164	0.36	0.08	0.44
36	P_36	Harsha	Control	4	4	2022-07-30	2022-08-20	2022-08-20	21	0	0.047	0.149	0.33	0.06	0.39
37	P_37	Harsha	Stress	4	1	2022-07-30	2022-08-20	2022-08-20	21	0	0.058	0.146	0.32	0.1	0.42
38	P_38	Harsha	Stress	4	2	2022-07-30	2022-08-20	2022-08-20	21	0	0.06	0.153	0.33	0.1	0.43
39	P_39	Harsha	Stress	4	3	2022-07-30	2022-08-20	2022-08-20	21	0	0.032	0.158	0.36	0	0.36
40	P_40	Harsha	Stress	4	4	2022-07-30	2022-08-20	2022-08-20	21	0	0.044	0.143	0.32	0.05	0.37
41	P_41	IC-415144	Control	4	1	2022-07-30	2022-08-20	2022-08-20	21	0	0.065	0.14	0.3	0.13	0.43
42	P_42	IC-415144	Control	4	2	2022-07-30	2022-08-20	2022-08-20	21	0	0.061	0.147	0.32	0.11	0.43
43	P_43	IC-415144	Control	4	3	2022-07-30	2022-08-20	2022-08-20	21	0	0.069	0.121	0.25	0.16	0.41
44	P_44	IC-415144	Control	4	4	2022-07-30	2022-08-20	2022-08-20	21	0	0.071	0.138	0.29	0.16	0.45
45	P_45	IC-415144	Stress	4	1	2022-07-30	2022-08-20	2022-08-20	21	0	0.062	0.134	0.29	0.13	0.42
46	P_46	IC-415144	Stress	4	2	2022-07-30	2022-08-20	2022-08-20	21	0	0.058	0.141	0.3	0.11	0.41
47	P_47	IC-415144	Stress	4	3	2022-07-30	2022-08-20	2022-08-20	21	0	0.047	0.145	0.32	0.06	0.38
48	P_48	IC-415144	Stress	4	4	2022-07-30	2022-08-20	2022-08-20	21	0	0.058	0.132	0.28	0.11	0.39
49	P_49	IPM-205-7	Control	4	1	2022-07-30	2022-08-20	2022-08-20	21	0	0.06	0.129	0.27	0.12	0.39
50	P_50	IPM-205-7	Control	4	2	2022-07-30	2022-08-20	2022-08-20	21	0	0.056	0.135	0.29	0.1	0.39
51	P_51	IPM-205-7	Control	4	3	2022-07-30	2022-08-20	2022-08-20	21	0	0.064	0.14	0.3	0.13	0.43
52	P_52	IPM-205-7	Control	4	4	2022-07-30	2022-08-20	2022-08-20	21	0	0.066	0.127	0.27	0.15	0.42
53	P_53	IPM-205-7	Stress	4	1	2022-07-30	2022-08-20	2022-08-20	21	0	0.058	0.124	0.26	0.12	0.38
54	P_54	IPM-205-7	Stress	4	2	2022-07-30	2022-08-20	2022-08-20	21	0	0.054	0.13	0.28	0.1	0.38
55	P_55	IPM-205-7	Stress	4	3	2022-07-30	2022-08-20	2022-08-20	21	0	0.061	0.134	0.29	0.12	0.41
56	P_56	IPM-205-7	Stress	4	4	2022-07-30	2022-08-20	2022-08-20	21	0	0.063	0.122	0.26	0.14	0.4
57	P_57	NM-94	Control	4	1	2022-07-30	2022-08-20	2022-08-20	21	0	0.042	0.155	0.34	0.04	0.38
58	P_58	NM-94	Control	4	2	2022-07-30	2022-08-20	2022-08-20	21	0	0.047	0.162	0.36	0.05	0.41
59	P_59	NM-94	Control	4	3	2022-07-30	2022-08-20	2022-08-20	21	0	0.037	0.168	0.38	0.01	0.39
60	P_60	NM-94	Control	4	4	2022-07-30	2022-08-20	2022-08-20	21	0	0.049	0.153	0.34	0.06	0.4
61	P_61	NM-94	Stress	4	1	2022-07-30	2022-08-20	2022-08-20	21	0	0.049	0.144	0.32	0.07	0.39
62	P_62	NM-94	Stress	4	2	2022-07-30	2022-08-20	2022-08-20	21	0	0.055	0.151	0.33	0.09	0.42
63	P_63	NM-94	Stress	4	3	2022-07-30	2022-08-20	2022-08-20	21	0	0.044	0.156	0.35	0.04	0.39
64	P_64	NM-94	Stress	4	4	2022-07-30	2022-08-20	2022-08-20	21	0	0.046	0.142	0.31	0.06	0.37
65	P_65	PAU-911	Control	4	1	2022-07-30	2022-08-20	2022-08-20	21	0	0.036	0.139	0.31	0.03	0.34
66	P_66	PAU-911	Control	4	2	2022-07-30	2022-08-20	2022-08-20	21	0	0.062	0.145	0.31	0.12	0.43
67	P_67	PAU-911	Control	4	3	2022-07-30	2022-08-20	2022-08-20	21	0	0.051	0.125	0.27	0.09	0.36
68	P_68	PAU-911	Control	4	4	2022-07-30	2022-08-20	2022-08-20	21	0	0.073	0.136	0.29	0.17	0.46
69	P_69	PAU-911	Stress	4	1	2022-07-30	2022-08-20	2022-08-20	21	0	0.044	0.133	0.29	0.06	0.35
70	P_70	PAU-911	Stress	4	2	2022-07-30	2022-08-20	2022-08-20	21	0	0.049	0.139	0.3	0.07	0.37
71	P_71	PAU-911	Stress	4	3	2022-07-30	2022-08-20	2022-08-20	21	0	0.058	0.144	0.31	0.1	0.41
72	P_72	PAU-911	Stress	4	4	2022-07-30	2022-08-20	2022-08-20	21	0	0.047	0.131	0.29	0.07	0.36
73	P_73	VC-3960-88	Control	4	1	2022-07-30	2022-08-20	2022-08-20	21	0	0.051	0.128	0.28	0.09	0.37
74	P_74	VC-3960-88	Control	4	2	2022-07-30	2022-08-20	2022-08-20	21	0	0.057	0.134	0.29	0.11	0.4
75	P_75	VC-3960-88	Control	4	3	2022-07-30	2022-08-20	2022-08-20	21	0	0.065	0.138	0.29	0.14	0.43
76	P_76	VC-3960-88	Control	4	4	2022-07-30	2022-08-20	2022-08-20	21	0	0.067	0.125	0.26	0.15	0.41
77	P_77	VC-3960-88	Stress	4	1	2022-07-30	2022-08-20	2022-08-20	21	0	0.059	0.123	0.26	0.12	0.38
78	P_78	VC-3960-88	Stress	4	2	2022-07-30	2022-08-20	2022-08-20	21	0	0.055	0.128	0.27	0.11	0.38
79	P_79	VC-3960-88	Stress	4	3	2022-07-30	2022-08-20	2022-08-20	21	0	0.063	0.133	0.28	0.13	0.41
80	P_80	VC-3960-88	Stress	4	4	2022-07-30	2022-08-20	2022-08-20	21	0	0.064	0.102	0.21	0.16	0.37
81	P_81	VC-6372 (45-8-1)	Control	4	1	2022-07-30	2022-08-20	2022-08-20	21	0	0.046	0.118	0.26	0.08	0.34
82	P_82	VC-6372 (45-8-1)	Control	4	2	2022-07-30	2022-08-20	2022-08-20	21	0	0.043	0.123	0.27	0.06	0.33
83	P_83	VC-6372 (45-8-1)	Control	4	3	2022-07-30	2022-08-20	2022-08-20	21	0	0.06	0.127	0.27	0.13	0.4
84	P_84	VC-6372 (45-8-1)	Control	4	4	2022-07-30	2022-08-20	2022-08-20	21	0	0.062	0.106	0.22	0.15	0.37
85	P_85	VC-6372 (45-8-1)	Stress	4	1	2022-07-30	2022-08-20	2022-08-20	21	0	0.071	0.107	0.22	0.18	0.4
86	P_86	VC-6372 (45-8-1)	Stress	4	2	2022-07-30	2022-08-20	2022-08-20	21	0	0.046	0.154	0.34	0.05	0.39
87	P_87	VC-6372 (45-8-1)	Stress	4	3	2022-07-30	2022-08-20	2022-08-20	21	0	0.035	0.15	0.34	0.01	0.35
88	P_88	VC-6372 (45-8-1)	Stress	4	4	2022-07-30	2022-08-20	2022-08-20	21	0	0.037	0.145	0.32	0.02	0.34
89	P_89	Vaibhav	Control	4	1	2022-07-30	2022-08-20	2022-08-20	21	0	0.068	0.117	0.24	0.16	0.4
90	P_90	Vaibhav	Control	4	2	2022-07-30	2022-08-20	2022-08-20	21	0	0.063	0.144	0.31	0.12	0.43
91	P_91	Vaibhav	Control	4	3	2022-07-30	2022-08-20	2022-08-20	21	0	0.072	0.108	0.22	0.19	0.41
92	P_92	Vaibhav	Control	4	4	2022-07-30	2022-08-20	2022-08-20	21	0	0.044	0.135	0.3	0.06	0.36
93	P_93	Vaibhav	Stress	4	1	2022-07-30	2022-08-20	2022-08-20	21	0	0.045	0.132	0.29	0.06	0.35
94	P_94	Vaibhav	Stress	4	2	2022-07-30	2022-08-20	2022-08-20	21	0	0.061	0.118	0.25	0.14	0.39
95	P_95	Vaibhav	Stress	4	3	2022-07-30	2022-08-20	2022-08-20	21	0	0.069	0.102	0.21	0.18	0.39
96	P_96	Vaibhav	Stress	4	4	2022-07-30	2022-08-20	2022-08-20	21	0	0.071	0.109	0.22	0.18	0.4
97	P_01	EC-693356	Control	4	1	2022-07-30	2022-08-20	2022-09-13	45	24	0.049	0.187	0.42	0.04	0.46
98	P_02	EC-693356	Control	4	2	2022-07-30	2022-08-20	2022-09-13	45	24	0.051	0.196	0.44	0.04	0.48
99	P_03	EC-693356	Control	4	3	2022-07-30	2022-08-20	2022-09-13	45	24	0.063	0.148	0.32	0.12	0.44
100	P_04	EC-693356	Control	4	4	2022-07-30	2022-08-20	2022-09-13	45	24	0.046	0.184	0.41	0.03	0.44
101	P_05	EC-693356	Stress	4	1	2022-07-30	2022-08-20	2022-09-13	45	24	0.057	0.148	0.32	0.1	0.42
102	P_06	EC-693356	Stress	4	2	2022-07-30	2022-08-20	2022-09-13	45	24	0.073	0.138	0.29	0.17	0.46
103	P_07	EC-693356	Stress	4	3	2022-07-30	2022-08-20	2022-09-13	45	24	0.079	0.134	0.28	0.19	0.47
104	P_08	EC-693356	Stress	4	4	2022-07-30	2022-08-20	2022-09-13	45	24	0.035	0.177	0.4	0.01	0.41
105	P_09	EC-693357	Control	4	1	2022-07-30	2022-08-20	2022-09-13	45	24	0.041	0.163	0.36	0.03	0.39
106	P_10	EC-693357	Control	4	2	2022-07-30	2022-08-20	2022-09-13	45	24	0.048	0.171	0.38	0.05	0.43
107	P_11	EC-693357	Control	4	3	2022-07-30	2022-08-20	2022-09-13	45	24	0.057	0.176	0.39	0.08	0.47
108	P_12	EC-693357	Control	4	4	2022-07-30	2022-08-20	2022-09-13	45	24	0.038	0.16	0.36	0.02	0.38
109	P_13	EC-693357	Stress	4	1	2022-07-30	2022-08-20	2022-09-13	45	24	0.038	0.121	0.27	0.05	0.32
110	P_14	EC-693357	Stress	4	2	2022-07-30	2022-08-20	2022-09-13	45	24	0.026	0.126	0.28	0	0.28
111	P_15	EC-693357	Stress	4	3	2022-07-30	2022-08-20	2022-09-13	45	24	0.058	0.098	0.2	0.14	0.34
112	P_16	EC-693357	Stress	4	4	2022-07-30	2022-08-20	2022-09-13	45	24	0.06	0.086	0.17	0.16	0.33
113	P_17	EC-693358	Control	4	1	2022-07-30	2022-08-20	2022-09-13	45	24	0.067	0.116	0.24	0.16	0.4
114	P_18	EC-693358	Control	4	2	2022-07-30	2022-08-20	2022-09-13	45	24	0.06	0.141	0.3	0.11	0.41
115	P_19	EC-693358	Control	4	3	2022-07-30	2022-08-20	2022-09-13	45	24	0.069	0.126	0.26	0.16	0.42
116	P_20	EC-693358	Control	4	4	2022-07-30	2022-08-20	2022-09-13	45	24	0.071	0.113	0.23	0.18	0.41
117	P_21	EC-693358	Stress	4	1	2022-07-30	2022-08-20	2022-09-13	45	24	0.049	0.109	0.23	0.1	0.33
118	P_22	EC-693358	Stress	4	2	2022-07-30	2022-08-20	2022-09-13	45	24	0.046	0.114	0.25	0.08	0.33
119	P_23	EC-693358	Stress	4	3	2022-07-30	2022-08-20	2022-09-13	45	24	0.028	0.118	0.26	0.01	0.27
120	P_24	EC-693358	Stress	4	4	2022-07-30	2022-08-20	2022-09-13	45	24	0.038	0.106	0.23	0.06	0.29
121	P_25	EC-693363	Control	4	1	2022-07-30	2022-08-20	2022-09-13	45	24	0.063	0.139	0.3	0.13	0.43
122	P_26	EC-693363	Control	4	2	2022-07-30	2022-08-20	2022-09-13	45	24	0.059	0.146	0.32	0.11	0.43
123	P_27	EC-693363	Control	4	3	2022-07-30	2022-08-20	2022-09-13	45	24	0.067	0.151	0.32	0.13	0.45
124	P_28	EC-693363	Control	4	4	2022-07-30	2022-08-20	2022-09-13	45	24	0.068	0.137	0.29	0.15	0.44
125	P_29	EC-693363	Stress	4	1	2022-07-30	2022-08-20	2022-09-13	45	24	0.06	0.092	0.19	0.15	0.34
126	P_30	EC-693363	Stress	4	2	2022-07-30	2022-08-20	2022-09-13	45	24	0.056	0.082	0.17	0.15	0.32
127	P_31	EC-693363	Stress	4	3	2022-07-30	2022-08-20	2022-09-13	45	24	0.063	0.095	0.19	0.16	0.35
128	P_32	EC-693363	Stress	4	4	2022-07-30	2022-08-20	2022-09-13	45	24	0.065	0.082	0.16	0.18	0.34
129	P_33	Harsha	Control	4	1	2022-07-30	2022-08-20	2022-09-13	45	24	0.054	0.161	0.35	0.08	0.43
130	P_34	Harsha	Control	4	2	2022-07-30	2022-08-20	2022-09-13	45	24	0.038	0.169	0.38	0.01	0.39
131	P_35	Harsha	Control	4	3	2022-07-30	2022-08-20	2022-09-13	45	24	0.058	0.174	0.38	0.08	0.46
132	P_36	Harsha	Control	4	4	2022-07-30	2022-08-20	2022-09-13	45	24	0.05	0.158	0.35	0.06	0.41
133	P_37	Harsha	Stress	4	1	2022-07-30	2022-08-20	2022-09-13	45	24	0.059	0.149	0.32	0.1	0.42
134	P_38	Harsha	Stress	4	2	2022-07-30	2022-08-20	2022-09-13	45	24	0.061	0.156	0.34	0.11	0.45
135	P_39	Harsha	Stress	4	3	2022-07-30	2022-08-20	2022-09-13	45	24	0.033	0.161	0.36	0	0.36
136	P_40	Harsha	Stress	4	4	2022-07-30	2022-08-20	2022-09-13	45	24	0.045	0.146	0.32	0.05	0.37
137	P_41	IC-415144	Control	4	1	2022-07-30	2022-08-20	2022-09-13	45	24	0.071	0.153	0.33	0.15	0.48
138	P_42	IC-415144	Control	4	2	2022-07-30	2022-08-20	2022-09-13	45	24	0.066	0.16	0.34	0.12	0.46
139	P_43	IC-415144	Control	4	3	2022-07-30	2022-08-20	2022-09-13	45	24	0.075	0.132	0.27	0.18	0.45
140	P_44	IC-415144	Control	4	4	2022-07-30	2022-08-20	2022-09-13	45	24	0.077	0.15	0.32	0.17	0.49
141	P_45	IC-415144	Stress	4	1	2022-07-30	2022-08-20	2022-09-13	45	24	0.065	0.141	0.3	0.13	0.43
142	P_46	IC-415144	Stress	4	2	2022-07-30	2022-08-20	2022-09-13	45	24	0.061	0.152	0.33	0.11	0.44
143	P_47	IC-415144	Stress	4	3	2022-07-30	2022-08-20	2022-09-13	45	24	0.051	0.155	0.34	0.07	0.41
144	P_48	IC-415144	Stress	4	4	2022-07-30	2022-08-20	2022-09-13	45	24	0.063	0.144	0.31	0.12	0.43
145	P_49	IPM-205-7	Control	4	1	2022-07-30	2022-08-20	2022-09-13	45	24	0.062	0.134	0.29	0.13	0.42
146	P_50	IPM-205-7	Control	4	2	2022-07-30	2022-08-20	2022-09-13	45	24	0.057	0.128	0.27	0.11	0.38
147	P_51	IPM-205-7	Control	4	3	2022-07-30	2022-08-20	2022-09-13	45	24	0.065	0.133	0.28	0.14	0.42
148	P_52	IPM-205-7	Control	4	4	2022-07-30	2022-08-20	2022-09-13	45	24	0.067	0.121	0.25	0.16	0.41
149	P_53	IPM-205-7	Stress	4	1	2022-07-30	2022-08-20	2022-09-13	45	24	0.045	0.097	0.21	0.09	0.3
150	P_54	IPM-205-7	Stress	4	2	2022-07-30	2022-08-20	2022-09-13	45	24	0.045	0.109	0.24	0.08	0.32
151	P_55	IPM-205-7	Stress	4	3	2022-07-30	2022-08-20	2022-09-13	45	24	0.051	0.113	0.24	0.1	0.34
152	P_56	IPM-205-7	Stress	4	4	2022-07-30	2022-08-20	2022-09-13	45	24	0.053	0.102	0.21	0.12	0.33
153	P_57	NM-94	Control	4	1	2022-07-30	2022-08-20	2022-09-13	45	24	0.043	0.158	0.35	0.04	0.39
154	P_58	NM-94	Control	4	2	2022-07-30	2022-08-20	2022-09-13	45	24	0.048	0.165	0.37	0.05	0.42
155	P_59	NM-94	Control	4	3	2022-07-30	2022-08-20	2022-09-13	45	24	0.038	0.171	0.38	0.01	0.39
156	P_60	NM-94	Control	4	4	2022-07-30	2022-08-20	2022-09-13	45	24	0.05	0.156	0.34	0.06	0.4
157	P_61	NM-94	Stress	4	1	2022-07-30	2022-08-20	2022-09-13	45	24	0.045	0.132	0.29	0.06	0.35
158	P_62	NM-94	Stress	4	2	2022-07-30	2022-08-20	2022-09-13	45	24	0.051	0.139	0.3	0.08	0.38
159	P_63	NM-94	Stress	4	3	2022-07-30	2022-08-20	2022-09-13	45	24	0.04	0.144	0.32	0.04	0.36
160	P_64	NM-94	Stress	4	4	2022-07-30	2022-08-20	2022-09-13	45	24	0.042	0.131	0.29	0.05	0.34
161	P_65	PAU-911	Control	4	1	2022-07-30	2022-08-20	2022-09-13	45	24	0.039	0.179	0.4	0	0.4
162	P_66	PAU-911	Control	4	2	2022-07-30	2022-08-20	2022-09-13	45	24	0.068	0.158	0.34	0.13	0.47
163	P_67	PAU-911	Control	4	3	2022-07-30	2022-08-20	2022-09-13	45	24	0.061	0.136	0.29	0.12	0.41
164	P_68	PAU-911	Control	4	4	2022-07-30	2022-08-20	2022-09-13	45	24	0.08	0.148	0.31	0.18	0.49
165	P_69	PAU-911	Stress	4	1	2022-07-30	2022-08-20	2022-09-13	45	24	0.046	0.14	0.31	0.06	0.37
166	P_70	PAU-911	Stress	4	2	2022-07-30	2022-08-20	2022-09-13	45	24	0.051	0.15	0.33	0.07	0.4
167	P_71	PAU-911	Stress	4	3	2022-07-30	2022-08-20	2022-09-13	45	24	0.063	0.154	0.33	0.12	0.45
168	P_72	PAU-911	Stress	4	4	2022-07-30	2022-08-20	2022-09-13	45	24	0.051	0.143	0.31	0.08	0.39
169	P_73	VC-3960-88	Control	4	1	2022-07-30	2022-08-20	2022-09-13	45	24	0.054	0.136	0.29	0.1	0.39
170	P_74	VC-3960-88	Control	4	2	2022-07-30	2022-08-20	2022-09-13	45	24	0.06	0.142	0.31	0.11	0.42
171	P_75	VC-3960-88	Control	4	3	2022-07-30	2022-08-20	2022-09-13	45	24	0.069	0.146	0.31	0.14	0.45
172	P_76	VC-3960-88	Control	4	4	2022-07-30	2022-08-20	2022-09-13	45	24	0.071	0.133	0.28	0.16	0.44
173	P_77	VC-3960-88	Stress	4	1	2022-07-30	2022-08-20	2022-09-13	45	24	0.06	0.125	0.27	0.13	0.4
174	P_78	VC-3960-88	Stress	4	2	2022-07-30	2022-08-20	2022-09-13	45	24	0.056	0.131	0.28	0.11	0.39
175	P_79	VC-3960-88	Stress	4	3	2022-07-30	2022-08-20	2022-09-13	45	24	0.064	0.136	0.29	0.13	0.42
176	P_80	VC-3960-88	Stress	4	4	2022-07-30	2022-08-20	2022-09-13	45	24	0.065	0.104	0.21	0.16	0.37
177	P_81	VC-6372 (45-8-1)	Control	4	1	2022-07-30	2022-08-20	2022-09-13	45	24	0.047	0.12	0.26	0.08	0.34
178	P_82	VC-6372 (45-8-1)	Control	4	2	2022-07-30	2022-08-20	2022-09-13	45	24	0.044	0.125	0.27	0.07	0.34
179	P_83	VC-6372 (45-8-1)	Control	4	3	2022-07-30	2022-08-20	2022-09-13	45	24	0.061	0.13	0.28	0.13	0.41
180	P_84	VC-6372 (45-8-1)	Control	4	4	2022-07-30	2022-08-20	2022-09-13	45	24	0.063	0.108	0.22	0.15	0.37
181	P_85	VC-6372 (45-8-1)	Stress	4	1	2022-07-30	2022-08-20	2022-09-13	45	24	0.065	0.098	0.2	0.17	0.37
182	P_86	VC-6372 (45-8-1)	Stress	4	2	2022-07-30	2022-08-20	2022-09-13	45	24	0.042	0.142	0.31	0.05	0.36
183	P_87	VC-6372 (45-8-1)	Stress	4	3	2022-07-30	2022-08-20	2022-09-13	45	24	0.032	0.138	0.31	0.01	0.32
184	P_88	VC-6372 (45-8-1)	Stress	4	4	2022-07-30	2022-08-20	2022-09-13	45	24	0.034	0.133	0.3	0.02	0.32
185	P_89	Vaibhav	Control	4	1	2022-07-30	2022-08-20	2022-09-13	45	24	0.072	0.124	0.26	0.17	0.43
186	P_90	Vaibhav	Control	4	2	2022-07-30	2022-08-20	2022-09-13	45	24	0.067	0.153	0.33	0.13	0.46
187	P_91	Vaibhav	Control	4	3	2022-07-30	2022-08-20	2022-09-13	45	24	0.076	0.114	0.23	0.2	0.43
188	P_92	Vaibhav	Control	4	4	2022-07-30	2022-08-20	2022-09-13	45	24	0.047	0.143	0.31	0.06	0.37
189	P_93	Vaibhav	Stress	4	1	2022-07-30	2022-08-20	2022-09-13	45	24	0.05	0.141	0.31	0.08	0.39
190	P_94	Vaibhav	Stress	4	2	2022-07-30	2022-08-20	2022-09-13	45	24	0.067	0.126	0.26	0.15	0.41
191	P_95	Vaibhav	Stress	4	3	2022-07-30	2022-08-20	2022-09-13	45	24	0.076	0.109	0.22	0.2	0.42
192	P_96	Vaibhav	Stress	4	4	2022-07-30	2022-08-20	2022-09-13	45	24	0.078	0.117	0.24	0.2	0.44
193	P_01	EC-693356	Control	4	1	2022-07-30	2022-08-20	2022-09-24	56	35	0.053	0.204	0.45	0.04	0.49
194	P_02	EC-693356	Control	4	2	2022-07-30	2022-08-20	2022-09-24	56	35	0.056	0.214	0.48	0.04	0.52
195	P_03	EC-693356	Control	4	3	2022-07-30	2022-08-20	2022-09-24	56	35	0.069	0.161	0.35	0.13	0.48
196	P_04	EC-693356	Control	4	4	2022-07-30	2022-08-20	2022-09-24	56	35	0.05	0.201	0.45	0.03	0.48
197	P_05	EC-693356	Stress	4	1	2022-07-30	2022-08-20	2022-09-24	56	35	0.062	0.161	0.35	0.11	0.46
198	P_06	EC-693356	Stress	4	2	2022-07-30	2022-08-20	2022-09-24	56	35	0.08	0.15	0.31	0.18	0.49
199	P_07	EC-693356	Stress	4	3	2022-07-30	2022-08-20	2022-09-24	56	35	0.081	0.146	0.31	0.19	0.5
200	P_08	EC-693356	Stress	4	4	2022-07-30	2022-08-20	2022-09-24	56	35	0.042	0.228	0.52	0.02	0.54
201	P_09	EC-693357	Control	4	1	2022-07-30	2022-08-20	2022-09-24	56	35	0.042	0.166	0.37	0.03	0.4
202	P_10	EC-693357	Control	4	2	2022-07-30	2022-08-20	2022-09-24	56	35	0.049	0.174	0.39	0.05	0.44
203	P_11	EC-693357	Control	4	3	2022-07-30	2022-08-20	2022-09-24	56	35	0.058	0.18	0.4	0.08	0.48
204	P_12	EC-693357	Control	4	4	2022-07-30	2022-08-20	2022-09-24	56	35	0.039	0.163	0.36	0.02	0.38
205	P_13	EC-693357	Stress	4	1	2022-07-30	2022-08-20	2022-09-24	56	35	0.035	0.111	0.24	0.04	0.28
206	P_14	EC-693357	Stress	4	2	2022-07-30	2022-08-20	2022-09-24	56	35	0.024	0.116	0.26	0	0.26
207	P_15	EC-693357	Stress	4	3	2022-07-30	2022-08-20	2022-09-24	56	35	0.053	0.09	0.19	0.13	0.32
208	P_16	EC-693357	Stress	4	4	2022-07-30	2022-08-20	2022-09-24	56	35	0.055	0.079	0.16	0.14	0.3
209	P_17	EC-693358	Control	4	1	2022-07-30	2022-08-20	2022-09-24	56	35	0.07	0.121	0.25	0.17	0.42
210	P_18	EC-693358	Control	4	2	2022-07-30	2022-08-20	2022-09-24	56	35	0.061	0.134	0.29	0.12	0.41
211	P_19	EC-693358	Control	4	3	2022-07-30	2022-08-20	2022-09-24	56	35	0.07	0.12	0.25	0.17	0.42
212	P_20	EC-693358	Control	4	4	2022-07-30	2022-08-20	2022-09-24	56	35	0.072	0.107	0.22	0.19	0.41
213	P_21	EC-693358	Stress	4	1	2022-07-30	2022-08-20	2022-09-24	56	35	0.041	0.092	0.2	0.08	0.28
214	P_22	EC-693358	Stress	4	2	2022-07-30	2022-08-20	2022-09-24	56	35	0.039	0.096	0.21	0.07	0.28
215	P_23	EC-693358	Stress	4	3	2022-07-30	2022-08-20	2022-09-24	56	35	0.024	0.099	0.22	0.01	0.23
216	P_24	EC-693358	Stress	4	4	2022-07-30	2022-08-20	2022-09-24	56	35	0.032	0.089	0.19	0.05	0.24
217	P_25	EC-693363	Control	4	1	2022-07-30	2022-08-20	2022-09-24	56	35	0.066	0.145	0.31	0.13	0.44
218	P_26	EC-693363	Control	4	2	2022-07-30	2022-08-20	2022-09-24	56	35	0.06	0.139	0.3	0.12	0.42
219	P_27	EC-693363	Control	4	3	2022-07-30	2022-08-20	2022-09-24	56	35	0.068	0.143	0.3	0.14	0.44
220	P_28	EC-693363	Control	4	4	2022-07-30	2022-08-20	2022-09-24	56	35	0.069	0.13	0.27	0.16	0.43
221	P_29	EC-693363	Stress	4	1	2022-07-30	2022-08-20	2022-09-24	56	35	0.05	0.077	0.16	0.13	0.29
222	P_30	EC-693363	Stress	4	2	2022-07-30	2022-08-20	2022-09-24	56	35	0.047	0.069	0.14	0.12	0.26
223	P_31	EC-693363	Stress	4	3	2022-07-30	2022-08-20	2022-09-24	56	35	0.053	0.08	0.16	0.14	0.3
224	P_32	EC-693363	Stress	4	4	2022-07-30	2022-08-20	2022-09-24	56	35	0.055	0.069	0.14	0.15	0.29
225	P_33	Harsha	Control	4	1	2022-07-30	2022-08-20	2022-09-24	56	35	0.057	0.171	0.38	0.08	0.46
226	P_34	Harsha	Control	4	2	2022-07-30	2022-08-20	2022-09-24	56	35	0.04	0.179	0.4	0.01	0.41
227	P_35	Harsha	Control	4	3	2022-07-30	2022-08-20	2022-09-24	56	35	0.061	0.184	0.4	0.08	0.48
228	P_36	Harsha	Control	4	4	2022-07-30	2022-08-20	2022-09-24	56	35	0.053	0.167	0.37	0.07	0.44
229	P_37	Harsha	Stress	4	1	2022-07-30	2022-08-20	2022-09-24	56	35	0.06	0.152	0.33	0.11	0.44
230	P_38	Harsha	Stress	4	2	2022-07-30	2022-08-20	2022-09-24	56	35	0.062	0.159	0.34	0.11	0.45
231	P_39	Harsha	Stress	4	3	2022-07-30	2022-08-20	2022-09-24	56	35	0.034	0.164	0.37	0	0.37
232	P_40	Harsha	Stress	4	4	2022-07-30	2022-08-20	2022-09-24	56	35	0.046	0.149	0.33	0.06	0.39
233	P_41	IC-415144	Control	4	1	2022-07-30	2022-08-20	2022-09-24	56	35	0.077	0.167	0.36	0.16	0.52
234	P_42	IC-415144	Control	4	2	2022-07-30	2022-08-20	2022-09-24	56	35	0.072	0.174	0.38	0.13	0.51
235	P_43	IC-415144	Control	4	3	2022-07-30	2022-08-20	2022-09-24	56	35	0.082	0.144	0.3	0.19	0.49
236	P_44	IC-415144	Control	4	4	2022-07-30	2022-08-20	2022-09-24	56	35	0.084	0.164	0.35	0.19	0.54
237	P_45	IC-415144	Stress	4	1	2022-07-30	2022-08-20	2022-09-24	56	35	0.068	0.148	0.32	0.14	0.46
238	P_46	IC-415144	Stress	4	2	2022-07-30	2022-08-20	2022-09-24	56	35	0.064	0.164	0.36	0.11	0.47
239	P_47	IC-415144	Stress	4	3	2022-07-30	2022-08-20	2022-09-24	56	35	0.056	0.166	0.36	0.08	0.44
240	P_48	IC-415144	Stress	4	4	2022-07-30	2022-08-20	2022-09-24	56	35	0.069	0.157	0.34	0.14	0.48
241	P_49	IPM-205-7	Control	4	1	2022-07-30	2022-08-20	2022-09-24	56	35	0.064	0.139	0.3	0.13	0.43
242	P_50	IPM-205-7	Control	4	2	2022-07-30	2022-08-20	2022-09-24	56	35	0.058	0.122	0.26	0.12	0.38
243	P_51	IPM-205-7	Control	4	3	2022-07-30	2022-08-20	2022-09-24	56	35	0.066	0.126	0.27	0.15	0.42
244	P_52	IPM-205-7	Control	4	4	2022-07-30	2022-08-20	2022-09-24	56	35	0.068	0.115	0.24	0.16	0.4
245	P_53	IPM-205-7	Stress	4	1	2022-07-30	2022-08-20	2022-09-24	56	35	0.038	0.081	0.17	0.08	0.25
246	P_54	IPM-205-7	Stress	4	2	2022-07-30	2022-08-20	2022-09-24	56	35	0.038	0.092	0.2	0.07	0.27
247	P_55	IPM-205-7	Stress	4	3	2022-07-30	2022-08-20	2022-09-24	56	35	0.043	0.095	0.2	0.09	0.29
248	P_56	IPM-205-7	Stress	4	4	2022-07-30	2022-08-20	2022-09-24	56	35	0.045	0.086	0.18	0.1	0.28
249	P_57	NM-94	Control	4	1	2022-07-30	2022-08-20	2022-09-24	56	35	0.044	0.161	0.36	0.04	0.4
250	P_58	NM-94	Control	4	2	2022-07-30	2022-08-20	2022-09-24	56	35	0.049	0.168	0.37	0.05	0.42
251	P_59	NM-94	Control	4	3	2022-07-30	2022-08-20	2022-09-24	56	35	0.039	0.174	0.39	0.01	0.4
252	P_60	NM-94	Control	4	4	2022-07-30	2022-08-20	2022-09-24	56	35	0.051	0.159	0.35	0.07	0.42
253	P_61	NM-94	Stress	4	1	2022-07-30	2022-08-20	2022-09-24	56	35	0.041	0.121	0.27	0.06	0.33
254	P_62	NM-94	Stress	4	2	2022-07-30	2022-08-20	2022-09-24	56	35	0.047	0.128	0.28	0.08	0.36
255	P_63	NM-94	Stress	4	3	2022-07-30	2022-08-20	2022-09-24	56	35	0.037	0.132	0.29	0.03	0.32
256	P_64	NM-94	Stress	4	4	2022-07-30	2022-08-20	2022-09-24	56	35	0.039	0.121	0.27	0.05	0.32
257	P_65	PAU-911	Control	4	1	2022-07-30	2022-08-20	2022-09-24	56	35	0.043	0.231	0.52	0.02	0.54
258	P_66	PAU-911	Control	4	2	2022-07-30	2022-08-20	2022-09-24	56	35	0.074	0.172	0.37	0.14	0.51
259	P_67	PAU-911	Control	4	3	2022-07-30	2022-08-20	2022-09-24	56	35	0.073	0.148	0.31	0.16	0.47
260	P_68	PAU-911	Control	4	4	2022-07-30	2022-08-20	2022-09-24	56	35	0.087	0.161	0.34	0.2	0.54
261	P_69	PAU-911	Stress	4	1	2022-07-30	2022-08-20	2022-09-24	56	35	0.048	0.147	0.32	0.06	0.38
262	P_70	PAU-911	Stress	4	2	2022-07-30	2022-08-20	2022-09-24	56	35	0.054	0.162	0.36	0.07	0.43
263	P_71	PAU-911	Stress	4	3	2022-07-30	2022-08-20	2022-09-24	56	35	0.069	0.165	0.36	0.13	0.49
264	P_72	PAU-911	Stress	4	4	2022-07-30	2022-08-20	2022-09-24	56	35	0.056	0.156	0.34	0.09	0.43
265	P_73	VC-3960-88	Control	4	1	2022-07-30	2022-08-20	2022-09-24	56	35	0.057	0.144	0.31	0.1	0.41
266	P_74	VC-3960-88	Control	4	2	2022-07-30	2022-08-20	2022-09-24	56	35	0.064	0.151	0.32	0.12	0.44
267	P_75	VC-3960-88	Control	4	3	2022-07-30	2022-08-20	2022-09-24	56	35	0.073	0.155	0.33	0.15	0.48
268	P_76	VC-3960-88	Control	4	4	2022-07-30	2022-08-20	2022-09-24	56	35	0.075	0.141	0.3	0.17	0.47
269	P_77	VC-3960-88	Stress	4	1	2022-07-30	2022-08-20	2022-09-24	56	35	0.061	0.128	0.27	0.13	0.4
270	P_78	VC-3960-88	Stress	4	2	2022-07-30	2022-08-20	2022-09-24	56	35	0.057	0.134	0.29	0.11	0.4
271	P_79	VC-3960-88	Stress	4	3	2022-07-30	2022-08-20	2022-09-24	56	35	0.065	0.139	0.3	0.13	0.43
272	P_80	VC-3960-88	Stress	4	4	2022-07-30	2022-08-20	2022-09-24	56	35	0.066	0.106	0.22	0.16	0.38
273	P_81	VC-6372 (45-8-1)	Control	4	1	2022-07-30	2022-08-20	2022-09-24	56	35	0.048	0.122	0.26	0.08	0.34
274	P_82	VC-6372 (45-8-1)	Control	4	2	2022-07-30	2022-08-20	2022-09-24	56	35	0.045	0.128	0.28	0.07	0.35
275	P_83	VC-6372 (45-8-1)	Control	4	3	2022-07-30	2022-08-20	2022-09-24	56	35	0.062	0.133	0.28	0.13	0.41
276	P_84	VC-6372 (45-8-1)	Control	4	4	2022-07-30	2022-08-20	2022-09-24	56	35	0.064	0.11	0.23	0.15	0.38
277	P_85	VC-6372 (45-8-1)	Stress	4	1	2022-07-30	2022-08-20	2022-09-24	56	35	0.06	0.09	0.18	0.15	0.33
278	P_86	VC-6372 (45-8-1)	Stress	4	2	2022-07-30	2022-08-20	2022-09-24	56	35	0.039	0.131	0.29	0.04	0.33
279	P_87	VC-6372 (45-8-1)	Stress	4	3	2022-07-30	2022-08-20	2022-09-24	56	35	0.029	0.127	0.28	0.01	0.29
280	P_88	VC-6372 (45-8-1)	Stress	4	4	2022-07-30	2022-08-20	2022-09-24	56	35	0.031	0.122	0.27	0.02	0.29
281	P_89	Vaibhav	Control	4	1	2022-07-30	2022-08-20	2022-09-24	56	35	0.076	0.131	0.27	0.18	0.45
282	P_90	Vaibhav	Control	4	2	2022-07-30	2022-08-20	2022-09-24	56	35	0.071	0.162	0.35	0.14	0.49
283	P_91	Vaibhav	Control	4	3	2022-07-30	2022-08-20	2022-09-24	56	35	0.081	0.121	0.25	0.21	0.46
284	P_92	Vaibhav	Control	4	4	2022-07-30	2022-08-20	2022-09-24	56	35	0.05	0.152	0.33	0.07	0.4
285	P_93	Vaibhav	Stress	4	1	2022-07-30	2022-08-20	2022-09-24	56	35	0.055	0.151	0.33	0.09	0.42
286	P_94	Vaibhav	Stress	4	2	2022-07-30	2022-08-20	2022-09-24	56	35	0.074	0.135	0.28	0.17	0.45
287	P_95	Vaibhav	Stress	4	3	2022-07-30	2022-08-20	2022-09-24	56	35	0.084	0.117	0.24	0.22	0.46
288	P_96	Vaibhav	Stress	4	4	2022-07-30	2022-08-20	2022-09-24	56	35	0.086	0.125	0.25	0.22	0.47

## Sheet: MSI_final
Sr. No.	PotID	Genotype	Water treatment	Rep	Sub Rep	DoS	DoSI	DoObs	DAS	DASI	EC @ 400C	EC @ 1000C	MSI (%)
1	P_01	EC-693356	Control	4	1	2022-07-30	2022-08-20	2022-08-20	21	0	26.35	131.2	79.9162		Average of MSI (%)	Column Labels
2	P_02	EC-693356	Control	4	2	2022-07-30	2022-08-20	2022-08-20	21	0	28.46	136.45	79.1425		Row Labels	Control	Stress			Row Labels	Control	Stress
3	P_03	EC-693356	Control	4	3	2022-07-30	2022-08-20	2022-08-20	21	0	27.4	133.82	79.5247		EC-693356	79.6757	76.6867			EC-693356	79.6757	76.6867
4	P_04	EC-693356	Control	4	4	2022-07-30	2022-08-20	2022-08-20	21	0	29.6	124.46	76.2173		EC-693357	79.51	75.2894			EC-693357	79.51	75.2894
5	P_05	EC-693356	Stress	4	1	2022-07-30	2022-08-20	2022-08-20	21	0	27.19	132.04	79.4078		EC-693358	78.8962	74.7961			EC-693358	78.8962	74.7961
6	P_06	EC-693356	Stress	4	2	2022-07-30	2022-08-20	2022-08-20	21	0	27.62	135.61	79.6328		EC-693363	80.0544	76.206			EC-693363	80.0544	76.206
7	P_07	EC-693356	Stress	4	3	2022-07-30	2022-08-20	2022-08-20	21	0	28.27	134.7	79.0126		Harsha	80.4626	77.3565			Harsha	80.4626	77.3565
8	P_08	EC-693356	Stress	4	4	2022-07-30	2022-08-20	2022-08-20	21	0	30.57	125.58	75.657		IC-415144	80.3669	77.5721			IC-415144	80.3669	77.5721
9	P_09	EC-693357	Control	4	1	2022-07-30	2022-08-20	2022-08-20	21	0	26.77	131.62	79.6611		IPM-205-7	79.9863	75.3145			IPM-205-7	79.9863	75.3145
10	P_10	EC-693357	Control	4	2	2022-07-30	2022-08-20	2022-08-20	21	0	28.04	136.03	79.3869		NM-94	80.964	76.3551			NM-94	80.964	76.3551
11	P_11	EC-693357	Control	4	3	2022-07-30	2022-08-20	2022-08-20	21	0	27.84	134.26	79.2641		PAU-911	80.8035	77.537			PAU-911	80.8035	77.537
12	P_12	EC-693357	Control	4	4	2022-07-30	2022-08-20	2022-08-20	21	0	30.08	125.02	75.9398		Vaibhav	81.8258	77.311			Vaibhav	81.8258	77.311
13	P_13	EC-693357	Stress	4	1	2022-07-30	2022-08-20	2022-08-20	21	0	26.98	131.83	79.5342		VC-3960-88	80.6005	78.0514			VC-3960-88	80.6005	78.0514
14	P_14	EC-693357	Stress	4	2	2022-07-30	2022-08-20	2022-08-20	21	0	27.83	135.82	79.5096		VC-6372 (45-8-1)	81.9853	77.6067			VC-6372 (45-8-1)	81.9853	77.6067
15	P_15	EC-693357	Stress	4	3	2022-07-30	2022-08-20	2022-08-20	21	0	28.06	134.48	79.1344
16	P_16	EC-693357	Stress	4	4	2022-07-30	2022-08-20	2022-08-20	21	0	30.32	125.3	75.8021
17	P_17	EC-693358	Control	4	1	2022-07-30	2022-08-20	2022-08-20	21	0	27.95	136.99	79.5971
18	P_18	EC-693358	Control	4	2	2022-07-30	2022-08-20	2022-08-20	21	0	29.05	141.36	79.4496
19	P_19	EC-693358	Control	4	3	2022-07-30	2022-08-20	2022-08-20	21	0	29.07	139.75	79.1986
20	P_20	EC-693358	Control	4	4	2022-07-30	2022-08-20	2022-08-20	21	0	30.5	117.65	74.0756
21	P_21	EC-693358	Stress	4	1	2022-07-30	2022-08-20	2022-08-20	21	0	27.47	134.41	79.5625
22	P_22	EC-693358	Stress	4	2	2022-07-30	2022-08-20	2022-08-20	21	0	28.44	138.59	79.479
23	P_23	EC-693358	Stress	4	3	2022-07-30	2022-08-20	2022-08-20	21	0	28.56	137.12	79.1715
24	P_24	EC-693358	Stress	4	4	2022-07-30	2022-08-20	2022-08-20	21	0	30.41	121.47	74.965
25	P_25	EC-693363	Control	4	1	2022-07-30	2022-08-20	2022-08-20	21	0	26.6	135.7	80.3979
26	P_26	EC-693363	Control	4	2	2022-07-30	2022-08-20	2022-08-20	21	0	28.74	139.97	79.467
27	P_27	EC-693363	Control	4	3	2022-07-30	2022-08-20	2022-08-20	21	0	28.81	138.43	79.188
28	P_28	EC-693363	Control	4	4	2022-07-30	2022-08-20	2022-08-20	21	0	27.11	119.56	77.3252
29	P_29	EC-693363	Stress	4	1	2022-07-30	2022-08-20	2022-08-20	21	0	24.6	135.06	81.7859
30	P_30	EC-693363	Stress	4	2	2022-07-30	2022-08-20	2022-08-20	21	0	28.59	139.28	79.473
31	P_31	EC-693363	Stress	4	3	2022-07-30	2022-08-20	2022-08-20	21	0	28.69	137.77	79.1754
32	P_32	EC-693363	Stress	4	4	2022-07-30	2022-08-20	2022-08-20	21	0	25.02	120.52	79.24
33	P_33	Harsha	Control	4	1	2022-07-30	2022-08-20	2022-08-20	21	0	25.6	135.38	81.0903
34	P_34	Harsha	Control	4	2	2022-07-30	2022-08-20	2022-08-20	21	0	28.67	139.63	79.4672
35	P_35	Harsha	Control	4	3	2022-07-30	2022-08-20	2022-08-20	21	0	28.75	138.1	79.1818
36	P_36	Harsha	Control	4	4	2022-07-30	2022-08-20	2022-08-20	21	0	26.07	120.04	78.2822
37	P_37	Harsha	Stress	4	1	2022-07-30	2022-08-20	2022-08-20	21	0	25.1	135.22	81.4377
38	P_38	Harsha	Stress	4	2	2022-07-30	2022-08-20	2022-08-20	21	0	28.63	139.45	79.4693
39	P_39	Harsha	Stress	4	3	2022-07-30	2022-08-20	2022-08-20	21	0	28.72	137.94	79.1794
40	P_40	Harsha	Stress	4	4	2022-07-30	2022-08-20	2022-08-20	21	0	25.54	120.28	78.7662
41	P_41	IC-415144	Control	4	1	2022-07-30	2022-08-20	2022-08-20	21	0	25.6	135.3	81.0791
42	P_42	IC-415144	Control	4	2	2022-07-30	2022-08-20	2022-08-20	21	0	28.94	139.54	79.2604
43	P_43	IC-415144	Control	4	3	2022-07-30	2022-08-20	2022-08-20	21	0	29.02	138.02	78.9741
44	P_44	IC-415144	Control	4	4	2022-07-30	2022-08-20	2022-08-20	21	0	26.06	120.16	78.3123
45	P_45	IC-415144	Stress	4	1	2022-07-30	2022-08-20	2022-08-20	21	0	25.6	135.26	81.0735
46	P_46	IC-415144	Stress	4	2	2022-07-30	2022-08-20	2022-08-20	21	0	29.07	139.5	79.1613
47	P_47	IC-415144	Stress	4	3	2022-07-30	2022-08-20	2022-08-20	21	0	29.16	137.98	78.8665
48	P_48	IC-415144	Stress	4	4	2022-07-30	2022-08-20	2022-08-20	21	0	26.06	120.22	78.3231
49	P_49	IPM-205-7	Control	4	1	2022-07-30	2022-08-20	2022-08-20	21	0	25.86	135.28	80.8841
50	P_50	IPM-205-7	Control	4	2	2022-07-30	2022-08-20	2022-08-20	21	0	29.29	139.52	79.0066
51	P_51	IPM-205-7	Control	4	3	2022-07-30	2022-08-20	2022-08-20	21	0	29.38	138	78.7101
52	P_52	IPM-205-7	Control	4	4	2022-07-30	2022-08-20	2022-08-20	21	0	26.32	120.19	78.1013
53	P_53	IPM-205-7	Stress	4	1	2022-07-30	2022-08-20	2022-08-20	21	0	25.99	135.27	80.7866
54	P_54	IPM-205-7	Stress	4	2	2022-07-30	2022-08-20	2022-08-20	21	0	29.47	139.51	78.8761
55	P_55	IPM-205-7	Stress	4	3	2022-07-30	2022-08-20	2022-08-20	21	0	29.56	137.99	78.5782
56	P_56	IPM-205-7	Stress	4	4	2022-07-30	2022-08-20	2022-08-20	21	0	26.45	120.2	77.995
57	P_57	NM-94	Control	4	1	2022-07-30	2022-08-20	2022-08-20	21	0	24.63	135.27	81.792
58	P_58	NM-94	Control	4	2	2022-07-30	2022-08-20	2022-08-20	21	0	27.91	139.51	79.9943
59	P_59	NM-94	Control	4	3	2022-07-30	2022-08-20	2022-08-20	21	0	28	138	79.7101
60	P_60	NM-94	Control	4	4	2022-07-30	2022-08-20	2022-08-20	21	0	25.07	120.19	79.1414
61	P_61	NM-94	Stress	4	1	2022-07-30	2022-08-20	2022-08-20	21	0	25.31	135.27	81.2893
62	P_62	NM-94	Stress	4	2	2022-07-30	2022-08-20	2022-08-20	21	0	28.69	139.51	79.4352
63	P_63	NM-94	Stress	4	3	2022-07-30	2022-08-20	2022-08-20	21	0	28.78	137.99	79.1434
64	P_64	NM-94	Stress	4	4	2022-07-30	2022-08-20	2022-08-20	21	0	25.76	120.2	78.5691
65	P_65	PAU-911	Control	4	1	2022-07-30	2022-08-20	2022-08-20	21	0	24.97	135.27	81.5406
66	P_66	PAU-911	Control	4	2	2022-07-30	2022-08-20	2022-08-20	21	0	28.3	139.51	79.7147
67	P_67	PAU-911	Control	4	3	2022-07-30	2022-08-20	2022-08-20	21	0	28.39	137.99	79.426
68	P_68	PAU-911	Control	4	4	2022-07-30	2022-08-20	2022-08-20	21	0	25.42	120.2	78.8519
69	P_69	PAU-911	Stress	4	1	2022-07-30	2022-08-20	2022-08-20	21	0	26.14	140.68	81.4188
70	P_70	PAU-911	Stress	4	2	2022-07-30	2022-08-20	2022-08-20	21	0	29.64	145.09	79.5713
71	P_71	PAU-911	Stress	4	3	2022-07-30	2022-08-20	2022-08-20	21	0	29.73	143.51	79.2837
72	P_72	PAU-911	Stress	4	4	2022-07-30	2022-08-20	2022-08-20	21	0	25.84	112.99	77.1307
73	P_73	VC-3960-88	Control	4	1	2022-07-30	2022-08-20	2022-08-20	21	0	25.56	137.98	81.4756
74	P_74	VC-3960-88	Control	4	2	2022-07-30	2022-08-20	2022-08-20	21	0	28.97	142.3	79.6416
75	P_75	VC-3960-88	Control	4	3	2022-07-30	2022-08-20	2022-08-20	21	0	29.06	140.75	79.3535
76	P_76	VC-3960-88	Control	4	4	2022-07-30	2022-08-20	2022-08-20	21	0	25.63	116.59	78.017
77	P_77	VC-3960-88	Stress	4	1	2022-07-30	2022-08-20	2022-08-20	21	0	24.82	139.33	82.1862
78	P_78	VC-3960-88	Stress	4	2	2022-07-30	2022-08-20	2022-08-20	21	0	29.31	143.7	79.6033
79	P_79	VC-3960-88	Stress	4	3	2022-07-30	2022-08-20	2022-08-20	21	0	29.39	142.13	79.3217
80	P_80	VC-3960-88	Stress	4	4	2022-07-30	2022-08-20	2022-08-20	21	0	22.91	114.79	80.0418
81	P_81	VC-6372 (45-8-1)	Control	4	1	2022-07-30	2022-08-20	2022-08-20	21	0	22.92	138.65	83.4692
82	P_82	VC-6372 (45-8-1)	Control	4	2	2022-07-30	2022-08-20	2022-08-20	21	0	29.14	143	79.6224
83	P_83	VC-6372 (45-8-1)	Control	4	3	2022-07-30	2022-08-20	2022-08-20	21	0	29.23	141.44	79.334
84	P_84	VC-6372 (45-8-1)	Control	4	4	2022-07-30	2022-08-20	2022-08-20	21	0	21.11	115.69	81.753
85	P_85	VC-6372 (45-8-1)	Stress	4	1	2022-07-30	2022-08-20	2022-08-20	21	0	23.87	138.99	82.8261
86	P_86	VC-6372 (45-8-1)	Stress	4	2	2022-07-30	2022-08-20	2022-08-20	21	0	29.22	143.35	79.6163
87	P_87	VC-6372 (45-8-1)	Stress	4	3	2022-07-30	2022-08-20	2022-08-20	21	0	29.31	141.79	79.3286
88	P_88	VC-6372 (45-8-1)	Stress	4	4	2022-07-30	2022-08-20	2022-08-20	21	0	22.01	115.24	80.9007
89	P_89	Vaibhav	Control	4	1	2022-07-30	2022-08-20	2022-08-20	21	0	23.39	138.82	83.1508
90	P_90	Vaibhav	Control	4	2	2022-07-30	2022-08-20	2022-08-20	21	0	29.18	143.17	79.6186
91	P_91	Vaibhav	Control	4	3	2022-07-30	2022-08-20	2022-08-20	21	0	29.27	141.62	79.332
92	P_92	Vaibhav	Control	4	4	2022-07-30	2022-08-20	2022-08-20	21	0	21.56	115.46	81.3269
93	P_93	Vaibhav	Stress	4	1	2022-07-30	2022-08-20	2022-08-20	21	0	25.48	141.26	81.9623
94	P_94	Vaibhav	Stress	4	2	2022-07-30	2022-08-20	2022-08-20	21	0	26.08	121.26	78.4925
95	P_95	Vaibhav	Stress	4	3	2022-07-30	2022-08-20	2022-08-20	21	0	24.87	124.05	79.9516
96	P_96	Vaibhav	Stress	4	4	2022-07-30	2022-08-20	2022-08-20	21	0	25.33	116.85	78.3226
	P_01	EC-693356	Control	4	1	2022-07-30	2022-08-20	2022-09-13	45	24	25.1	132.05	80.992
	P_02	EC-693356	Control	4	2	2022-07-30	2022-08-20	2022-09-13	45	24	27.21	137.3	80.1821
	P_03	EC-693356	Control	4	3	2022-07-30	2022-08-20	2022-09-13	45	24	26.15	134.67	80.5822
	P_04	EC-693356	Control	4	4	2022-07-30	2022-08-20	2022-09-13	45	24	28.35	125.31	77.3761
	P_05	EC-693356	Stress	4	1	2022-07-30	2022-08-20	2022-09-13	45	24	29.37	132.79	77.8824
	P_06	EC-693356	Stress	4	2	2022-07-30	2022-08-20	2022-09-13	45	24	29.8	136.36	78.1461
	P_07	EC-693356	Stress	4	3	2022-07-30	2022-08-20	2022-09-13	45	24	30.45	135.45	77.5194
	P_08	EC-693356	Stress	4	4	2022-07-30	2022-08-20	2022-09-13	45	24	32.75	126.33	74.0758
	P_09	EC-693357	Control	4	1	2022-07-30	2022-08-20	2022-09-13	45	24	25.52	132.47	80.7353
	P_10	EC-693357	Control	4	2	2022-07-30	2022-08-20	2022-09-13	45	24	26.79	136.88	80.4281
	P_11	EC-693357	Control	4	3	2022-07-30	2022-08-20	2022-09-13	45	24	26.59	135.11	80.3197
	P_12	EC-693357	Control	4	4	2022-07-30	2022-08-20	2022-09-13	45	24	28.83	125.87	77.0954
	P_13	EC-693357	Stress	4	1	2022-07-30	2022-08-20	2022-09-13	45	24	30.77	131.22	76.5508
	P_14	EC-693357	Stress	4	2	2022-07-30	2022-08-20	2022-09-13	45	24	31.62	135.21	76.6142
	P_15	EC-693357	Stress	4	3	2022-07-30	2022-08-20	2022-09-13	45	24	31.85	133.87	76.2083
	P_16	EC-693357	Stress	4	4	2022-07-30	2022-08-20	2022-09-13	45	24	34.11	124.69	72.6442
	P_17	EC-693358	Control	4	1	2022-07-30	2022-08-20	2022-09-13	45	24	26.7	137.84	80.6297
	P_18	EC-693358	Control	4	2	2022-07-30	2022-08-20	2022-09-13	45	24	27.8	142.21	80.4514
	P_19	EC-693358	Control	4	3	2022-07-30	2022-08-20	2022-09-13	45	24	27.82	140.6	80.2134
	P_20	EC-693358	Control	4	4	2022-07-30	2022-08-20	2022-09-13	45	24	29.25	118.5	75.3165
	P_21	EC-693358	Stress	4	1	2022-07-30	2022-08-20	2022-09-13	45	24	31.39	133.1	76.4162
	P_22	EC-693358	Stress	4	2	2022-07-30	2022-08-20	2022-09-13	45	24	32.36	137.28	76.4277
	P_23	EC-693358	Stress	4	3	2022-07-30	2022-08-20	2022-09-13	45	24	32.48	135.81	76.0842
	P_24	EC-693358	Stress	4	4	2022-07-30	2022-08-20	2022-09-13	45	24	34.33	120.16	71.4298
	P_25	EC-693363	Control	4	1	2022-07-30	2022-08-20	2022-09-13	45	24	25.05	136.55	81.6551
	P_26	EC-693363	Control	4	2	2022-07-30	2022-08-20	2022-09-13	45	24	27.19	140.82	80.6917
	P_27	EC-693363	Control	4	3	2022-07-30	2022-08-20	2022-09-13	45	24	27.26	139.28	80.4279
	P_28	EC-693363	Control	4	4	2022-07-30	2022-08-20	2022-09-13	45	24	25.56	120.41	78.7725
	P_29	EC-693363	Stress	4	1	2022-07-30	2022-08-20	2022-09-13	45	24	28.72	133.75	78.5271
	P_30	EC-693363	Stress	4	2	2022-07-30	2022-08-20	2022-09-13	45	24	32.71	137.97	76.2919
	P_31	EC-693363	Stress	4	3	2022-07-30	2022-08-20	2022-09-13	45	24	32.81	136.46	75.9563
	P_32	EC-693363	Stress	4	4	2022-07-30	2022-08-20	2022-09-13	45	24	29.14	119.21	75.5557
	P_33	Harsha	Control	4	1	2022-07-30	2022-08-20	2022-09-13	45	24	24.35	136.23	82.1258
	P_34	Harsha	Control	4	2	2022-07-30	2022-08-20	2022-09-13	45	24	27.42	140.48	80.4812
	P_35	Harsha	Control	4	3	2022-07-30	2022-08-20	2022-09-13	45	24	27.5	138.95	80.2087
	P_36	Harsha	Control	4	4	2022-07-30	2022-08-20	2022-09-13	45	24	24.82	120.89	79.4689
	P_37	Harsha	Stress	4	1	2022-07-30	2022-08-20	2022-09-13	45	24	27.59	134.61	79.5038
	P_38	Harsha	Stress	4	2	2022-07-30	2022-08-20	2022-09-13	45	24	31.12	138.84	77.5857
	P_39	Harsha	Stress	4	3	2022-07-30	2022-08-20	2022-09-13	45	24	31.21	137.33	77.2737
	P_40	Harsha	Stress	4	4	2022-07-30	2022-08-20	2022-09-13	45	24	28.03	119.67	76.5773
	P_41	IC-415144	Control	4	1	2022-07-30	2022-08-20	2022-09-13	45	24	24.35	136.15	82.1153
	P_42	IC-415144	Control	4	2	2022-07-30	2022-08-20	2022-09-13	45	24	27.69	140.39	80.2764
	P_43	IC-415144	Control	4	3	2022-07-30	2022-08-20	2022-09-13	45	24	27.77	138.87	80.0029
	P_44	IC-415144	Control	4	4	2022-07-30	2022-08-20	2022-09-13	45	24	24.81	121.01	79.4976
	P_45	IC-415144	Stress	4	1	2022-07-30	2022-08-20	2022-09-13	45	24	27.78	136.01	79.575
	P_46	IC-415144	Stress	4	2	2022-07-30	2022-08-20	2022-09-13	45	24	31.25	140.25	77.7184
	P_47	IC-415144	Stress	4	3	2022-07-30	2022-08-20	2022-09-13	45	24	31.34	138.73	77.4094
	P_48	IC-415144	Stress	4	4	2022-07-30	2022-08-20	2022-09-13	45	24	28.24	120.97	76.6554
	P_49	IPM-205-7	Control	4	1	2022-07-30	2022-08-20	2022-09-13	45	24	24.61	136.13	81.9217
	P_50	IPM-205-7	Control	4	2	2022-07-30	2022-08-20	2022-09-13	45	24	28.04	140.37	80.0242
	P_51	IPM-205-7	Control	4	3	2022-07-30	2022-08-20	2022-09-13	45	24	28.13	138.85	79.7407
	P_52	IPM-205-7	Control	4	4	2022-07-30	2022-08-20	2022-09-13	45	24	25.07	121.04	79.2878
	P_53	IPM-205-7	Stress	4	1	2022-07-30	2022-08-20	2022-09-13	45	24	29.91	133.96	77.6724
	P_54	IPM-205-7	Stress	4	2	2022-07-30	2022-08-20	2022-09-13	45	24	33.39	138.2	75.8394
	P_55	IPM-205-7	Stress	4	3	2022-07-30	2022-08-20	2022-09-13	45	24	33.48	136.68	75.5048
	P_56	IPM-205-7	Stress	4	4	2022-07-30	2022-08-20	2022-09-13	45	24	30.37	118.89	74.4554
	P_57	NM-94	Control	4	1	2022-07-30	2022-08-20	2022-09-13	45	24	23.38	136.12	82.824
	P_58	NM-94	Control	4	2	2022-07-30	2022-08-20	2022-09-13	45	24	26.66	140.36	81.006
	P_59	NM-94	Control	4	3	2022-07-30	2022-08-20	2022-09-13	45	24	26.75	138.85	80.7346
	P_60	NM-94	Control	4	4	2022-07-30	2022-08-20	2022-09-13	45	24	23.82	121.04	80.3206
	P_61	NM-94	Stress	4	1	2022-07-30	2022-08-20	2022-09-13	45	24	29.1	134.66	78.39
	P_62	NM-94	Stress	4	2	2022-07-30	2022-08-20	2022-09-13	45	24	32.48	138.9	76.6163
	P_63	NM-94	Stress	4	3	2022-07-30	2022-08-20	2022-09-13	45	24	32.57	137.38	76.292
	P_64	NM-94	Stress	4	4	2022-07-30	2022-08-20	2022-09-13	45	24	29.55	119.59	75.2906
	P_65	PAU-911	Control	4	1	2022-07-30	2022-08-20	2022-09-13	45	24	23.78	136.12	82.5301
	P_66	PAU-911	Control	4	2	2022-07-30	2022-08-20	2022-09-13	45	24	27.11	140.36	80.6854
	P_67	PAU-911	Control	4	3	2022-07-30	2022-08-20	2022-09-13	45	24	27.2	138.84	80.4091
	P_68	PAU-911	Control	4	4	2022-07-30	2022-08-20	2022-09-13	45	24	24.23	121.05	79.9835
	P_69	PAU-911	Stress	4	1	2022-07-30	2022-08-20	2022-09-13	45	24	28.22	141.43	80.0467
	P_70	PAU-911	Stress	4	2	2022-07-30	2022-08-20	2022-09-13	45	24	31.72	145.84	78.2501
	P_71	PAU-911	Stress	4	3	2022-07-30	2022-08-20	2022-09-13	45	24	31.81	144.26	77.9495
	P_72	PAU-911	Stress	4	4	2022-07-30	2022-08-20	2022-09-13	45	24	27.92	113.74	75.4528
	P_73	VC-3960-88	Control	4	1	2022-07-30	2022-08-20	2022-09-13	45	24	24.31	138.83	82.4894
	P_74	VC-3960-88	Control	4	2	2022-07-30	2022-08-20	2022-09-13	45	24	27.72	143.15	80.6357
	P_75	VC-3960-88	Control	4	3	2022-07-30	2022-08-20	2022-09-13	45	24	27.81	141.6	80.3602
	P_76	VC-3960-88	Control	4	4	2022-07-30	2022-08-20	2022-09-13	45	24	24.38	117.44	79.2405
	P_77	VC-3960-88	Stress	4	1	2022-07-30	2022-08-20	2022-09-13	45	24	27.31	138.72	80.3129
	P_78	VC-3960-88	Stress	4	2	2022-07-30	2022-08-20	2022-09-13	45	24	31.8	143.09	77.7762
	P_79	VC-3960-88	Stress	4	3	2022-07-30	2022-08-20	2022-09-13	45	24	31.88	141.52	77.4731
	P_80	VC-3960-88	Stress	4	4	2022-07-30	2022-08-20	2022-09-13	45	24	25.4	114.18	77.7544
	P_81	VC-6372 (45-8-1)	Control	4	1	2022-07-30	2022-08-20	2022-09-13	45	24	21.67	139.5	84.4659
	P_82	VC-6372 (45-8-1)	Control	4	2	2022-07-30	2022-08-20	2022-09-13	45	24	27.89	143.85	80.6117
	P_83	VC-6372 (45-8-1)	Control	4	3	2022-07-30	2022-08-20	2022-09-13	45	24	27.98	142.29	80.3359
	P_84	VC-6372 (45-8-1)	Control	4	4	2022-07-30	2022-08-20	2022-09-13	45	24	19.86	116.54	82.9586
	P_85	VC-6372 (45-8-1)	Stress	4	1	2022-07-30	2022-08-20	2022-09-13	45	24	27.66	138.38	80.0116
	P_86	VC-6372 (45-8-1)	Stress	4	2	2022-07-30	2022-08-20	2022-09-13	45	24	33.01	142.74	76.874
	P_87	VC-6372 (45-8-1)	Stress	4	3	2022-07-30	2022-08-20	2022-09-13	45	24	33.1	141.18	76.5548
	P_88	VC-6372 (45-8-1)	Stress	4	4	2022-07-30	2022-08-20	2022-09-13	45	24	25.8	114.63	77.4928
	P_89	Vaibhav	Control	4	1	2022-07-30	2022-08-20	2022-09-13	45	24	22.14	139.67	84.1483
	P_90	Vaibhav	Control	4	2	2022-07-30	2022-08-20	2022-09-13	45	24	27.93	144.02	80.6069
	P_91	Vaibhav	Control	4	3	2022-07-30	2022-08-20	2022-09-13	45	24	28.02	142.47	80.3327
	P_92	Vaibhav	Control	4	4	2022-07-30	2022-08-20	2022-09-13	45	24	20.31	116.31	82.538
	P_93	Vaibhav	Stress	4	1	2022-07-30	2022-08-20	2022-09-13	45	24	27.67	140.65	80.3271
	P_94	Vaibhav	Stress	4	2	2022-07-30	2022-08-20	2022-09-13	45	24	28.57	120.65	76.3199
	P_95	Vaibhav	Stress	4	3	2022-07-30	2022-08-20	2022-09-13	45	24	27.36	123.44	77.8354
	P_96	Vaibhav	Stress	4	4	2022-07-30	2022-08-20	2022-09-13	45	24	27.92	116.24	75.9807
	P_01	EC-693356	Control	4	1	2022-07-30	2022-08-20	2022-09-24	56	35	24.26	132.9	81.7457
	P_02	EC-693356	Control	4	2	2022-07-30	2022-08-20	2022-09-24	56	35	26.37	138.15	80.9121
	P_03	EC-693356	Control	4	3	2022-07-30	2022-08-20	2022-09-24	56	35	25.31	135.52	81.3238
	P_04	EC-693356	Control	4	4	2022-07-30	2022-08-20	2022-09-24	56	35	27.51	126.16	78.1944
	P_05	EC-693356	Stress	4	1	2022-07-30	2022-08-20	2022-09-24	56	35	32.45	133.54	75.7002
	P_06	EC-693356	Stress	4	2	2022-07-30	2022-08-20	2022-09-24	56	35	32.88	137.11	76.0193
	P_07	EC-693356	Stress	4	3	2022-07-30	2022-08-20	2022-09-24	56	35	33.53	136.2	75.3818
	P_08	EC-693356	Stress	4	4	2022-07-30	2022-08-20	2022-09-24	56	35	35.83	127.08	71.8052
	P_09	EC-693357	Control	4	1	2022-07-30	2022-08-20	2022-09-24	56	35	24.79	133.32	81.4056
	P_10	EC-693357	Control	4	2	2022-07-30	2022-08-20	2022-09-24	56	35	26.06	137.73	81.0789
	P_11	EC-693357	Control	4	3	2022-07-30	2022-08-20	2022-09-24	56	35	25.86	135.96	80.9797
	P_12	EC-693357	Control	4	4	2022-07-30	2022-08-20	2022-09-24	56	35	28.1	126.72	77.8251
	P_13	EC-693357	Stress	4	1	2022-07-30	2022-08-20	2022-09-24	56	35	35.72	131.87	72.9127
	P_14	EC-693357	Stress	4	2	2022-07-30	2022-08-20	2022-09-24	56	35	36.57	135.86	73.0826
	P_15	EC-693357	Stress	4	3	2022-07-30	2022-08-20	2022-09-24	56	35	36.8	134.52	72.6435
	P_16	EC-693357	Stress	4	4	2022-07-30	2022-08-20	2022-09-24	56	35	39.06	125.34	68.8368
	P_17	EC-693358	Control	4	1	2022-07-30	2022-08-20	2022-09-24	56	35	26.47	138.69	80.9143
	P_18	EC-693358	Control	4	2	2022-07-30	2022-08-20	2022-09-24	56	35	27.57	143.06	80.7284
	P_19	EC-693358	Control	4	3	2022-07-30	2022-08-20	2022-09-24	56	35	27.59	141.45	80.4949
	P_20	EC-693358	Control	4	4	2022-07-30	2022-08-20	2022-09-24	56	35	29.02	119.35	75.685
	P_21	EC-693358	Stress	4	1	2022-07-30	2022-08-20	2022-09-24	56	35	36.94	133.75	72.3813
	P_22	EC-693358	Stress	4	2	2022-07-30	2022-08-20	2022-09-24	56	35	37.91	137.93	72.515
	P_23	EC-693358	Stress	4	3	2022-07-30	2022-08-20	2022-09-24	56	35	38.03	136.46	72.131
	P_24	EC-693358	Stress	4	4	2022-07-30	2022-08-20	2022-09-24	56	35	39.88	120.81	66.9895
	P_25	EC-693363	Control	4	1	2022-07-30	2022-08-20	2022-09-24	56	35	24.82	137.4	81.936
	P_26	EC-693363	Control	4	2	2022-07-30	2022-08-20	2022-09-24	56	35	26.96	141.67	80.9699
	P_27	EC-693363	Control	4	3	2022-07-30	2022-08-20	2022-09-24	56	35	27.03	140.13	80.7108
	P_28	EC-693363	Control	4	4	2022-07-30	2022-08-20	2022-09-24	56	35	25.33	121.26	79.111
	P_29	EC-693363	Stress	4	1	2022-07-30	2022-08-20	2022-09-24	56	35	34.77	134.4	74.1295
	P_30	EC-693363	Stress	4	2	2022-07-30	2022-08-20	2022-09-24	56	35	38.76	138.62	72.0387
	P_31	EC-693363	Stress	4	3	2022-07-30	2022-08-20	2022-09-24	56	35	38.86	137.11	71.6578
	P_32	EC-693363	Stress	4	4	2022-07-30	2022-08-20	2022-09-24	56	35	35.19	119.86	70.6407
	P_33	Harsha	Control	4	1	2022-07-30	2022-08-20	2022-09-24	56	35	23.52	137.08	82.8421
	P_34	Harsha	Control	4	2	2022-07-30	2022-08-20	2022-09-24	56	35	26.59	141.33	81.1859
	P_35	Harsha	Control	4	3	2022-07-30	2022-08-20	2022-09-24	56	35	26.67	139.8	80.9227
	P_36	Harsha	Control	4	4	2022-07-30	2022-08-20	2022-09-24	56	35	23.99	121.74	80.2941
	P_37	Harsha	Stress	4	1	2022-07-30	2022-08-20	2022-09-24	56	35	31.87	135.26	76.438
	P_38	Harsha	Stress	4	2	2022-07-30	2022-08-20	2022-09-24	56	35	35.4	139.49	74.6218
	P_39	Harsha	Stress	4	3	2022-07-30	2022-08-20	2022-09-24	56	35	35.49	137.98	74.2789
	P_40	Harsha	Stress	4	4	2022-07-30	2022-08-20	2022-09-24	56	35	32.31	120.32	73.1466
	P_41	IC-415144	Control	4	1	2022-07-30	2022-08-20	2022-09-24	56	35	23.51	137	82.8394
	P_42	IC-415144	Control	4	2	2022-07-30	2022-08-20	2022-09-24	56	35	26.85	141.24	80.9898
	P_43	IC-415144	Control	4	3	2022-07-30	2022-08-20	2022-09-24	56	35	26.93	139.72	80.7257
	P_44	IC-415144	Control	4	4	2022-07-30	2022-08-20	2022-09-24	56	35	23.97	121.86	80.3299
	P_45	IC-415144	Stress	4	1	2022-07-30	2022-08-20	2022-09-24	56	35	31.06	136.76	77.2887
	P_46	IC-415144	Stress	4	2	2022-07-30	2022-08-20	2022-09-24	56	35	34.53	141	75.5106
	P_47	IC-415144	Stress	4	3	2022-07-30	2022-08-20	2022-09-24	56	35	34.62	139.48	75.1792
	P_48	IC-415144	Stress	4	4	2022-07-30	2022-08-20	2022-09-24	56	35	31.52	121.72	74.1045
	P_49	IPM-205-7	Control	4	1	2022-07-30	2022-08-20	2022-09-24	56	35	24.38	136.98	82.2018
	P_50	IPM-205-7	Control	4	2	2022-07-30	2022-08-20	2022-09-24	56	35	27.81	141.22	80.3073
	P_51	IPM-205-7	Control	4	3	2022-07-30	2022-08-20	2022-09-24	56	35	27.9	139.7	80.0286
	P_52	IPM-205-7	Control	4	4	2022-07-30	2022-08-20	2022-09-24	56	35	24.84	121.89	79.621
	P_53	IPM-205-7	Stress	4	1	2022-07-30	2022-08-20	2022-09-24	56	35	36.36	134.21	72.9081
	P_54	IPM-205-7	Stress	4	2	2022-07-30	2022-08-20	2022-09-24	56	35	39.84	138.45	71.2243
	P_55	IPM-205-7	Stress	4	3	2022-07-30	2022-08-20	2022-09-24	56	35	39.93	136.93	70.8391
	P_56	IPM-205-7	Stress	4	4	2022-07-30	2022-08-20	2022-09-24	56	35	36.82	119.14	69.0952
	P_57	NM-94	Control	4	1	2022-07-30	2022-08-20	2022-09-24	56	35	23.15	136.97	83.0985
	P_58	NM-94	Control	4	2	2022-07-30	2022-08-20	2022-09-24	56	35	26.43	141.21	81.2832
	P_59	NM-94	Control	4	3	2022-07-30	2022-08-20	2022-09-24	56	35	26.52	139.7	81.0165
	P_60	NM-94	Control	4	4	2022-07-30	2022-08-20	2022-09-24	56	35	23.59	121.89	80.6465
	P_61	NM-94	Stress	4	1	2022-07-30	2022-08-20	2022-09-24	56	35	34.35	135.31	74.6138
	P_62	NM-94	Stress	4	2	2022-07-30	2022-08-20	2022-09-24	56	35	37.73	139.55	72.9631
	P_63	NM-94	Stress	4	3	2022-07-30	2022-08-20	2022-09-24	56	35	37.82	138.03	72.6002
	P_64	NM-94	Stress	4	4	2022-07-30	2022-08-20	2022-09-24	56	35	34.8	120.24	71.0579
	P_65	PAU-911	Control	4	1	2022-07-30	2022-08-20	2022-09-24	56	35	22.97	136.97	83.2299
	P_66	PAU-911	Control	4	2	2022-07-30	2022-08-20	2022-09-24	56	35	26.3	141.21	81.3753
	P_67	PAU-911	Control	4	3	2022-07-30	2022-08-20	2022-09-24	56	35	26.39	139.69	81.1082
	P_68	PAU-911	Control	4	4	2022-07-30	2022-08-20	2022-09-24	56	35	23.42	121.9	80.7875
	P_69	PAU-911	Stress	4	1	2022-07-30	2022-08-20	2022-09-24	56	35	31.9	142.18	77.5637
	P_70	PAU-911	Stress	4	2	2022-07-30	2022-08-20	2022-09-24	56	35	35.4	146.59	75.851
	P_71	PAU-911	Stress	4	3	2022-07-30	2022-08-20	2022-09-24	56	35	35.49	145.01	75.5258
	P_72	PAU-911	Stress	4	4	2022-07-30	2022-08-20	2022-09-24	56	35	31.6	114.49	72.3993
	P_73	VC-3960-88	Control	4	1	2022-07-30	2022-08-20	2022-09-24	56	35	23.37	139.68	83.2689
	P_74	VC-3960-88	Control	4	2	2022-07-30	2022-08-20	2022-09-24	56	35	26.78	144	81.4028
	P_75	VC-3960-88	Control	4	3	2022-07-30	2022-08-20	2022-09-24	56	35	26.87	142.45	81.1372
	P_76	VC-3960-88	Control	4	4	2022-07-30	2022-08-20	2022-09-24	56	35	23.44	118.29	80.1843
	P_77	VC-3960-88	Stress	4	1	2022-07-30	2022-08-20	2022-09-24	56	35	31.19	139.37	77.6207
	P_78	VC-3960-88	Stress	4	2	2022-07-30	2022-08-20	2022-09-24	56	35	35.68	143.74	75.1774
	P_79	VC-3960-88	Stress	4	3	2022-07-30	2022-08-20	2022-09-24	56	35	35.76	142.17	74.847
	P_80	VC-3960-88	Stress	4	4	2022-07-30	2022-08-20	2022-09-24	56	35	29.28	114.83	74.5014
	P_81	VC-6372 (45-8-1)	Control	4	1	2022-07-30	2022-08-20	2022-09-24	56	35	20.84	140.35	85.1514
	P_82	VC-6372 (45-8-1)	Control	4	2	2022-07-30	2022-08-20	2022-09-24	56	35	27.06	144.7	81.2992
	P_83	VC-6372 (45-8-1)	Control	4	3	2022-07-30	2022-08-20	2022-09-24	56	35	27.15	143.14	81.0326
	P_84	VC-6372 (45-8-1)	Control	4	4	2022-07-30	2022-08-20	2022-09-24	56	35	19.03	117.39	83.7891
	P_85	VC-6372 (45-8-1)	Stress	4	1	2022-07-30	2022-08-20	2022-09-24	56	35	32.24	139.03	76.8108
	P_86	VC-6372 (45-8-1)	Stress	4	2	2022-07-30	2022-08-20	2022-09-24	56	35	37.59	143.39	73.7848
	P_87	VC-6372 (45-8-1)	Stress	4	3	2022-07-30	2022-08-20	2022-09-24	56	35	37.68	141.83	73.433
	P_88	VC-6372 (45-8-1)	Stress	4	4	2022-07-30	2022-08-20	2022-09-24	56	35	30.38	115.28	73.6468
	P_89	Vaibhav	Control	4	1	2022-07-30	2022-08-20	2022-09-24	56	35	21.2	140.52	84.9132
	P_90	Vaibhav	Control	4	2	2022-07-30	2022-08-20	2022-09-24	56	35	26.99	144.87	81.3695
	P_91	Vaibhav	Control	4	3	2022-07-30	2022-08-20	2022-09-24	56	35	27.08	143.32	81.1052
	P_92	Vaibhav	Control	4	4	2022-07-30	2022-08-20	2022-09-24	56	35	19.37	117.16	83.4671
	P_93	Vaibhav	Stress	4	1	2022-07-30	2022-08-20	2022-09-24	56	35	31.55	141.3	77.6716
	P_94	Vaibhav	Stress	4	2	2022-07-30	2022-08-20	2022-09-24	56	35	32.45	121.3	73.2481
	P_95	Vaibhav	Stress	4	3	2022-07-30	2022-08-20	2022-09-24	56	35	31.24	124.09	74.8247
	P_96	Vaibhav	Stress	4	4	2022-07-30	2022-08-20	2022-09-24	56	35	31.8	116.89	72.7949

## Sheet: Sheet1
Treatment	Stress
Sub rep	3
DAS	56
Row Labels	Average of QY_max	Sum of DAS
EC 693356	0.62	56
EC 693357	0.45	56
EC 693358	0.32	56
EC 693363	0.4	56
Harsha	0.47	56
IC 415144	0.6	56
IPM 205-7	0.31	56
NM 94	0.47	56
PAU 911	0.6	56
Vaibhav	0.62	56
VC 3960-88	0.51	56
VC 6372 (45-8-1)	0.47	56
Grand Total	0.486667	672

## Sheet: QY_max_final
Sr. No.	DoS	DoSI	DoObs	DAS	DASI	Pot_ID	Genotype	Treatment	Rep	Sub rep	size [mm2]	F0	Fm	Fv	QY_max
1	44772	44793	44793	21	0	P_04	EC 693356	Control	4	1	792.92	474.93	1970.09	1495.16	0.76
2	44772	44793	44793	21	0	P_04	EC 693356	Control	4	2	792.52	472.61	1930.31	1457.7	0.76
3	44772	44793	44793	21	0	P_04	EC 693356	Control	4	3	793.2	495.78	2018.44	1522.66	0.75
4	2022-07-30	2022-08-20	2022-08-20	21	0	P_08	EC 693356	Stress	4	1	791.14	522.89	1817.91	1295.02	0.71
5	2022-07-30	2022-08-20	2022-08-20	21	0	P_08	EC 693356	Stress	4	2	786.8	480.06	2027.6	1547.54	0.76
6	2022-07-30	2022-08-20	2022-08-20	21	0	P_08	EC 693356	Stress	4	3	792.59	451.48	1981.82	1530.34	0.77
7	44772	44793	44793	21	0	P_12	EC 693357	Control	4	1	794.2	431.33	2050.34	1619.01	0.79
8	44772	44793	44793	21	0	P_12	EC 693357	Control	4	2	794.2	422.69	2010.6	1587.91	0.79
9	44772	44793	44793	21	0	P_12	EC 693357	Control	4	3	794.2	432.36	2029.85	1597.49	0.79
10	2022-07-30	2022-08-20	2022-08-20	21	0	P_16	EC 693357	Stress	4	1	787.63	454.95	2087.13	1632.18	0.78
11	2022-07-30	2022-08-20	2022-08-20	21	0	P_16	EC 693357	Stress	4	2	789.13	475.07	2093.55	1618.48	0.77
12	2022-07-30	2022-08-20	2022-08-20	21	0	P_16	EC 693357	Stress	4	3	697.39	436.46	2091.5	1655.04	0.79
13	44772	44793	44793	21	0	P_20	EC 693358	Control	4	1	763.88	480.63	2097.24	1616.61	0.77
14	44772	44793	44793	21	0	P_20	EC 693358	Control	4	2	786.73	465.29	2114.23	1648.94	0.78
15	44772	44793	44793	21	0	P_20	EC 693358	Control	4	3	776.94	485.67	2075.4	1589.73	0.77
16	2022-07-30	2022-08-20	2022-08-20	21	0	P_24	EC 693358	Stress	4	1	790.63	488.71	2104.06	1615.35	0.77
17	2022-07-30	2022-08-20	2022-08-20	21	0	P_24	EC 693358	Stress	4	2	792.85	444.75	2121.3	1676.55	0.79
18	2022-07-30	2022-08-20	2022-08-20	21	0	P_24	EC 693358	Stress	4	3	793.1	495.61	2108.88	1613.27	0.76
19	44772	44793	44793	21	0	P_28	EC 693363	Control	4	1	793.95	450.21	2025.23	1575.02	0.78
20	44772	44793	44793	21	0	P_28	EC 693363	Control	4	2	793.29	492.7	2049.07	1556.37	0.76
21	44772	44793	44793	21	0	P_28	EC 693363	Control	4	3	793.14	484.75	2018.96	1534.21	0.76
22	2022-07-30	2022-08-20	2022-08-20	21	0	P_32	EC 693363	Stress	4	1	779.19	393.26	2000.96	1607.7	0.8
23	2022-07-30	2022-08-20	2022-08-20	21	0	P_32	EC 693363	Stress	4	2	752.76	428.4	1983.66	1555.26	0.78
24	2022-07-30	2022-08-20	2022-08-20	21	0	P_32	EC 693363	Stress	4	3	782.79	405.26	2054.1	1648.84	0.8
25	44772	44793	44793	21	0	P_36	Harsha	Control	4	1	793.7	436.89	2056.23	1619.34	0.79
26	44772	44793	44793	21	0	P_36	Harsha	Control	4	2	793.89	442.86	1979.17	1536.31	0.78
27	44772	44793	44793	21	0	P_36	Harsha	Control	4	3	793.51	435.7	2085.01	1649.31	0.79
28	2022-07-30	2022-08-20	2022-08-20	21	0	P_40	Harsha	Stress	4	1	793.89	548.24	2167.87	1619.63	0.75
29	2022-07-30	2022-08-20	2022-08-20	21	0	P_40	Harsha	Stress	4	2	792.56	545.57	2103.44	1557.87	0.74
30	2022-07-30	2022-08-20	2022-08-20	21	0	P_40	Harsha	Stress	4	3	763.25	527.05	2080.68	1553.63	0.75
31	44772	44793	44793	21	0	P_44	IC 415144	Control	4	1	791.76	409.29	1836.19	1426.9	0.78
32	44772	44793	44793	21	0	P_44	IC 415144	Control	4	2	794.01	396.88	1960.89	1564.01	0.8
33	44772	44793	44793	21	0	P_44	IC 415144	Control	4	3	793.46	413.96	1840.14	1426.18	0.78
34	2022-07-30	2022-08-20	2022-08-20	21	0	P_48	IC 415144	Stress	4	1	793.24	416.38	2023.53	1607.15	0.79
35	2022-07-30	2022-08-20	2022-08-20	21	0	P_48	IC 415144	Stress	4	2	787.42	438.9	1964.7	1525.8	0.78
36	2022-07-30	2022-08-20	2022-08-20	21	0	P_48	IC 415144	Stress	4	3	779.89	470.39	1969.06	1498.67	0.76
37	44772	44793	44793	21	0	P_52	IPM 205-7	Control	4	1	785.72	468.12	2082.19	1614.07	0.78
38	44772	44793	44793	21	0	P_52	IPM 205-7	Control	4	2	787.11	394.61	2003.4	1608.79	0.8
39	44772	44793	44793	21	0	P_52	IPM 205-7	Control	4	3	784.12	469.93	2019.58	1549.65	0.77
40	2022-07-30	2022-08-20	2022-08-20	21	0	P_56	IPM 205-7	Stress	4	1	714.11	492.13	1939.53	1447.4	0.75
41	2022-07-30	2022-08-20	2022-08-20	21	0	P_56	IPM 205-7	Stress	4	2	777.2	508.8	2023.37	1514.57	0.75
42	2022-07-30	2022-08-20	2022-08-20	21	0	P_56	IPM 205-7	Stress	4	3	688.55	452.95	1966.76	1513.81	0.77
43	44772	44793	44793	21	0	P_60	NM 94	Control	4	1	790.28	409	1963.38	1554.38	0.79
44	44772	44793	44793	21	0	P_60	NM 94	Control	4	2	786.01	525.52	1982.87	1457.35	0.73
45	44772	44793	44793	21	0	P_60	NM 94	Control	4	3	782.98	526.6	1930.44	1403.84	0.73
46	2022-07-30	2022-08-20	2022-08-20	21	0	P_64	NM 94	Stress	4	1	760.8	547.64	2005.47	1457.83	0.73
47	2022-07-30	2022-08-20	2022-08-20	21	0	P_64	NM 94	Stress	4	2	781.17	449.41	1800.45	1351.04	0.75
48	2022-07-30	2022-08-20	2022-08-20	21	0	P_64	NM 94	Stress	4	3	773.42	397.85	1689.67	1291.82	0.76
49	44772	44793	44793	21	0	P_68	PAU 911	Control	4	1	785.73	388.9	1751.56	1362.66	0.78
50	44772	44793	44793	21	0	P_68	PAU 911	Control	4	2	789.19	411.54	1858.59	1447.05	0.78
51	44772	44793	44793	21	0	P_68	PAU 911	Control	4	3	782.43	448.86	2045.02	1596.16	0.78
52	2022-07-30	2022-08-20	2022-08-20	21	0	P_72	PAU 911	Stress	4	1	784.84	572.07	2133	1560.93	0.73
53	2022-07-30	2022-08-20	2022-08-20	21	0	P_72	PAU 911	Stress	4	2	777.65	578.05	2127.95	1549.9	0.73
54	2022-07-30	2022-08-20	2022-08-20	21	0	P_72	PAU 911	Stress	4	3	762.9	499.18	1942.8	1443.62	0.74
55	44772	44793	44793	21	0	P_76	VC 3960-88	Control	4	1	771.17	415.86	1817.81	1401.95	0.77
56	44772	44793	44793	21	0	P_76	VC 3960-88	Control	4	2	792.8	372.14	1879.34	1507.2	0.8
57	44772	44793	44793	21	0	P_76	VC 3960-88	Control	4	3	785.56	576.68	2174.26	1597.58	0.73
58	2022-07-30	2022-08-20	2022-08-20	21	0	P_80	VC 3960-88	Stress	4	1	794.01	432.39	2077.51	1645.12	0.79
59	2022-07-30	2022-08-20	2022-08-20	21	0	P_80	VC 3960-88	Stress	4	2	793.84	544.56	2178.18	1633.62	0.75
60	2022-07-30	2022-08-20	2022-08-20	21	0	P_80	VC 3960-88	Stress	4	3	793.2	432.6	1942.63	1510.03	0.78
61	44772	44793	44793	21	0	P_84	VC 6372 (45-8-1)	Control	4	1	786.99	418.45	1985.05	1566.6	0.79
62	44772	44793	44793	21	0	P_84	VC 6372 (45-8-1)	Control	4	2	790.61	441.95	1976.95	1535	0.78
63	44772	44793	44793	21	0	P_84	VC 6372 (45-8-1)	Control	4	3	792.96	588.47	2161.13	1572.66	0.73
64	2022-07-30	2022-08-20	2022-08-20	21	0	P_88	VC 6372 (45-8-1)	Stress	4	1	790.85	490.48	2153.93	1663.45	0.77
65	2022-07-30	2022-08-20	2022-08-20	21	0	P_88	VC 6372 (45-8-1)	Stress	4	2	793.21	445.36	2128.83	1683.47	0.79
66	2022-07-30	2022-08-20	2022-08-20	21	0	P_88	VC 6372 (45-8-1)	Stress	4	3	794.2	481.91	1911.75	1429.84	0.75
67	44772	44793	44793	21	0	P_92	Vaibhav	Control	4	1	792.7	430.49	1933.75	1503.26	0.78
68	44772	44793	44793	21	0	P_92	Vaibhav	Control	4	2	790.51	393.98	1896.15	1502.17	0.79
69	44772	44793	44793	21	0	P_92	Vaibhav	Control	4	3	791.88	423.85	1916.51	1492.66	0.78
70	2022-07-30	2022-08-20	2022-08-20	21	0	P_96	Vaibhav	Stress	4	1	792.28	416.51	1695.74	1279.23	0.75
71	2022-07-30	2022-08-20	2022-08-20	21	0	P_96	Vaibhav	Stress	4	2	791.99	426.12	1793.05	1366.93	0.76
72	2022-07-30	2022-08-20	2022-08-20	21	0	P_96	Vaibhav	Stress	4	3	784.37	421.31	1801.3	1379.99	0.77
73	2022-07-30	2022-08-20	2022-08-29	30	9	P_04	EC 693356	Control	4	1	791.53	374.93	1516.07	1141.14	0.75
74	2022-07-30	2022-08-20	2022-08-29	30	9	P_04	EC 693356	Control	4	2	712.96	372.61	1421.46	1048.85	0.74
75	2022-07-30	2022-08-20	2022-08-29	30	9	P_04	EC 693356	Control	4	3	793.2	408.16	1589	1180.84	0.74
76	2022-07-30	2022-08-20	2022-08-29	30	9	P_08	EC 693356	Stress	4	1	767.28	356.79	1428.92	1072.13	0.75
77	2022-07-30	2022-08-20	2022-08-29	30	9	P_08	EC 693356	Stress	4	2	782.6	416.4	1550.33	1133.93	0.73
78	2022-07-30	2022-08-20	2022-08-29	30	9	P_08	EC 693356	Stress	4	3	651.87	435.99	1685.74	1249.75	0.74
79	2022-07-30	2022-08-20	2022-08-29	30	9	P_12	EC 693357	Control	4	1	786.26	331.33	1229.55	898.22	0.73
80	2022-07-30	2022-08-20	2022-08-29	30	9	P_12	EC 693357	Control	4	2	660.22	322.69	1168.39	845.7	0.72
81	2022-07-30	2022-08-20	2022-08-29	30	9	P_12	EC 693357	Control	4	3	638.92	332.36	1078.01	745.65	0.69
82	2022-07-30	2022-08-20	2022-08-29	30	9	P_16	EC 693357	Stress	4	1	451.2	438.19	1391.9	953.71	0.69
83	2022-07-30	2022-08-20	2022-08-29	30	9	P_16	EC 693357	Stress	4	2	606.09	599.82	1680.1	1080.28	0.64
84	2022-07-30	2022-08-20	2022-08-29	30	9	P_16	EC 693357	Stress	4	3	530.34	559	1961.99	1402.99	0.72
85	2022-07-30	2022-08-20	2022-08-29	30	9	P_20	EC 693358	Control	4	1	763.88	444.27	1705.81	1261.54	0.74
86	2022-07-30	2022-08-20	2022-08-29	30	9	P_20	EC 693358	Control	4	2	769.55	443.92	1683.29	1239.37	0.74
87	2022-07-30	2022-08-20	2022-08-29	30	9	P_20	EC 693358	Control	4	3	637.58	484.61	1639.13	1154.52	0.7
88	2022-07-30	2022-08-20	2022-08-29	30	9	P_24	EC 693358	Stress	4	1	625.98	388.71	1095.33	706.62	0.65
89	2022-07-30	2022-08-20	2022-08-29	30	9	P_24	EC 693358	Stress	4	2	566.7	362.94	1079.36	716.42	0.66
90	2022-07-30	2022-08-20	2022-08-29	30	9	P_24	EC 693358	Stress	4	3	311.1	411.91	1196.42	784.51	0.66
91	2022-07-30	2022-08-20	2022-08-29	30	9	P_28	EC 693363	Control	4	1	483.09	350.21	1421.2	1070.99	0.75
92	2022-07-30	2022-08-20	2022-08-29	30	9	P_28	EC 693363	Control	4	2	632.24	406.95	1644.88	1237.93	0.75
93	2022-07-30	2022-08-20	2022-08-29	30	9	P_28	EC 693363	Control	4	3	545.84	300.74	1269.69	968.95	0.76
94	2022-07-30	2022-08-20	2022-08-29	30	9	P_32	EC 693363	Stress	4	1	759.27	518.87	1649.88	1131.01	0.69
95	2022-07-30	2022-08-20	2022-08-29	30	9	P_32	EC 693363	Stress	4	2	638.93	487.29	1590.01	1102.72	0.69
96	2022-07-30	2022-08-20	2022-08-29	30	9	P_32	EC 693363	Stress	4	3	682.79	548.45	1635.34	1086.89	0.66
97	2022-07-30	2022-08-20	2022-08-29	30	9	P_36	Harsha	Control	4	1	753.49	336.89	1503.22	1166.33	0.78
98	2022-07-30	2022-08-20	2022-08-29	30	9	P_36	Harsha	Control	4	2	739.52	342.86	1422.88	1080.02	0.76
99	2022-07-30	2022-08-20	2022-08-29	30	9	P_36	Harsha	Control	4	3	648.24	335.7	1499.61	1163.91	0.78
100	2022-07-30	2022-08-20	2022-08-29	30	9	P_40	Harsha	Stress	4	1	663.16	474.5	1731.99	1257.49	0.73
101	2022-07-30	2022-08-20	2022-08-29	30	9	P_40	Harsha	Stress	4	2	576.88	497.47	1651.88	1154.41	0.7
102	2022-07-30	2022-08-20	2022-08-29	30	9	P_40	Harsha	Stress	4	3	582.24	482.49	1699.83	1217.34	0.72
103	2022-07-30	2022-08-20	2022-08-29	30	9	P_44	IC 415144	Control	4	1	607.32	437.52	1695.02	1257.5	0.74
104	2022-07-30	2022-08-20	2022-08-29	30	9	P_44	IC 415144	Control	4	2	649.84	437.41	1696.09	1258.68	0.74
105	2022-07-30	2022-08-20	2022-08-29	30	9	P_44	IC 415144	Control	4	3	701.26	430.18	1674.17	1243.99	0.74
106	2022-07-30	2022-08-20	2022-08-29	30	9	P_48	IC 415144	Stress	4	1	509.27	492.9	1763	1270.1	0.72
107	2022-07-30	2022-08-20	2022-08-29	30	9	P_48	IC 415144	Stress	4	2	575.29	481.18	1938.12	1456.94	0.75
108	2022-07-30	2022-08-20	2022-08-29	30	9	P_48	IC 415144	Stress	4	3	628.01	499.41	1880.58	1381.17	0.73
109	2022-07-30	2022-08-20	2022-08-29	30	9	P_52	IPM 205-7	Control	4	1	610.97	368.12	1655.47	1287.35	0.78
110	2022-07-30	2022-08-20	2022-08-29	30	9	P_52	IPM 205-7	Control	4	2	656.22	394.61	1649.82	1255.21	0.76
111	2022-07-30	2022-08-20	2022-08-29	30	9	P_52	IPM 205-7	Control	4	3	525.61	380.06	1578.64	1198.58	0.76
112	2022-07-30	2022-08-20	2022-08-29	30	9	P_56	IPM 205-7	Stress	4	1	659.4	513.53	1569.73	1056.2	0.67
113	2022-07-30	2022-08-20	2022-08-29	30	9	P_56	IPM 205-7	Stress	4	2	656.6	556.44	1690.02	1133.58	0.67
114	2022-07-30	2022-08-20	2022-08-29	30	9	P_56	IPM 205-7	Stress	4	3	458.2	497.74	1638.93	1141.19	0.7
115	2022-07-30	2022-08-20	2022-08-29	30	9	P_60	NM 94	Control	4	1	790.28	451.8	1568.92	1117.12	0.71
116	2022-07-30	2022-08-20	2022-08-29	30	9	P_60	NM 94	Control	4	2	731.67	394.2	1525.83	1131.63	0.74
117	2022-07-30	2022-08-20	2022-08-29	30	9	P_60	NM 94	Control	4	3	653.89	426.4	1696.56	1270.16	0.75
118	2022-07-30	2022-08-20	2022-08-29	30	9	P_64	NM 94	Stress	4	1	653.89	526.4	1696.56	1170.16	0.69
119	2022-07-30	2022-08-20	2022-08-29	30	9	P_64	NM 94	Stress	4	2	659.77	619.25	1845.04	1225.79	0.66
120	2022-07-30	2022-08-20	2022-08-29	30	9	P_64	NM 94	Stress	4	3	638.73	584.13	1742.28	1158.15	0.66
121	2022-07-30	2022-08-20	2022-08-29	30	9	P_68	PAU 911	Control	4	1	459	417.29	1676.44	1259.15	0.75
122	2022-07-30	2022-08-20	2022-08-29	30	9	P_68	PAU 911	Control	4	2	691.42	473.46	1761.27	1287.81	0.73
123	2022-07-30	2022-08-20	2022-08-29	30	9	P_68	PAU 911	Control	4	3	646.81	485.39	1862.06	1376.67	0.74
124	2022-07-30	2022-08-20	2022-08-29	30	9	P_72	PAU 911	Stress	4	1	594.61	372.07	1373.75	1001.68	0.73
125	2022-07-30	2022-08-20	2022-08-29	30	9	P_72	PAU 911	Stress	4	2	547.13	378.05	1350.64	972.59	0.72
126	2022-07-30	2022-08-20	2022-08-29	30	9	P_72	PAU 911	Stress	4	3	542.05	369.18	1347.18	978	0.73
127	2022-07-30	2022-08-20	2022-08-29	30	9	P_76	VC 3960-88	Control	4	1	758.8	415.86	1503.13	1087.27	0.72
128	2022-07-30	2022-08-20	2022-08-29	30	9	P_76	VC 3960-88	Control	4	2	659.61	387.85	1482.22	1094.37	0.74
129	2022-07-30	2022-08-20	2022-08-29	30	9	P_76	VC 3960-88	Control	4	3	767.74	394.73	1671.4	1276.67	0.76
130	2022-07-30	2022-08-20	2022-08-29	30	9	P_80	VC 3960-88	Stress	4	1	794.01	456.78	1592.73	1135.95	0.71
131	2022-07-30	2022-08-20	2022-08-29	30	9	P_80	VC 3960-88	Stress	4	2	793.84	483.64	1868.24	1384.6	0.74
132	2022-07-30	2022-08-20	2022-08-29	30	9	P_80	VC 3960-88	Stress	4	3	678.36	472.5	1686.25	1213.75	0.72
133	2022-07-30	2022-08-20	2022-08-29	30	9	P_84	VC 6372 (45-8-1)	Control	4	1	762.09	418.45	1719.44	1300.99	0.76
134	2022-07-30	2022-08-20	2022-08-29	30	9	P_84	VC 6372 (45-8-1)	Control	4	2	777.38	441.95	1768.59	1326.64	0.75
135	2022-07-30	2022-08-20	2022-08-29	30	9	P_84	VC 6372 (45-8-1)	Control	4	3	770.82	418	1621.89	1203.89	0.74
136	2022-07-30	2022-08-20	2022-08-29	30	9	P_88	VC 6372 (45-8-1)	Stress	4	1	655	490.48	1497.23	1006.75	0.67
137	2022-07-30	2022-08-20	2022-08-29	30	9	P_88	VC 6372 (45-8-1)	Stress	4	2	793.21	445.36	1570.21	1124.85	0.72
138	2022-07-30	2022-08-20	2022-08-29	30	9	P_88	VC 6372 (45-8-1)	Stress	4	3	793.84	481.91	1582.79	1100.88	0.7
139	2022-07-30	2022-08-20	2022-08-29	30	9	P_92	Vaibhav	Control	4	1	633.39	430.49	1599.83	1169.34	0.73
140	2022-07-30	2022-08-20	2022-08-29	30	9	P_92	Vaibhav	Control	4	2	529.81	393.98	1449.66	1055.68	0.73
141	2022-07-30	2022-08-20	2022-08-29	30	9	P_92	Vaibhav	Control	4	3	626.41	343.43	1660.59	1317.16	0.79
142	2022-07-30	2022-08-20	2022-08-29	30	9	P_96	Vaibhav	Stress	4	1	701.8	376.08	1354.82	978.74	0.72
143	2022-07-30	2022-08-20	2022-08-29	30	9	P_96	Vaibhav	Stress	4	2	618.17	409.9	1455.74	1045.84	0.72
144	2022-07-30	2022-08-20	2022-08-29	30	9	P_96	Vaibhav	Stress	4	3	772.78	451.69	1323.65	871.96	0.66
145	2022-07-30	2022-08-20	2022-09-02	34	13	P_04	EC 693356	Control	4	1	792.92	465.33	1685	1219.67	0.72
146	2022-07-30	2022-08-20	2022-09-02	34	13	P_04	EC 693356	Control	4	2	792.52	465.58	1716.42	1250.84	0.73
147	2022-07-30	2022-08-20	2022-09-02	34	13	P_04	EC 693356	Control	4	3	793.07	397.84	1693.89	1296.05	0.77
148	2022-07-30	2022-08-20	2022-09-02	34	13	P_08	EC 693356	Stress	4	1	653.54	439.98	1591.47	1151.49	0.72
149	2022-07-30	2022-08-20	2022-09-02	34	13	P_08	EC 693356	Stress	4	2	786.8	453.11	1693.72	1240.61	0.73
150	2022-07-30	2022-08-20	2022-09-02	34	13	P_08	EC 693356	Stress	4	3	767.54	494.12	1461.76	967.64	0.66
151	2022-07-30	2022-08-20	2022-09-02	34	13	P_12	EC 693357	Control	4	1	794.2	512.61	1770.22	1257.61	0.71
152	2022-07-30	2022-08-20	2022-09-02	34	13	P_12	EC 693357	Control	4	2	794.2	490.2	1691.34	1201.14	0.71
153	2022-07-30	2022-08-20	2022-09-02	34	13	P_12	EC 693357	Control	4	3	794.2	459	1673.27	1214.27	0.73
154	2022-07-30	2022-08-20	2022-09-02	34	13	P_16	EC 693357	Stress	4	1	668.37	592.75	1787.98	1195.23	0.67
155	2022-07-30	2022-08-20	2022-09-02	34	13	P_16	EC 693357	Stress	4	2	616.75	520.13	1671.48	1151.35	0.69
156	2022-07-30	2022-08-20	2022-09-02	34	13	P_16	EC 693357	Stress	4	3	648.79	558.85	1702.36	1143.51	0.67
157	2022-07-30	2022-08-20	2022-09-02	34	13	P_20	EC 693358	Control	4	1	749.5	472.49	1668.89	1196.4	0.72
158	2022-07-30	2022-08-20	2022-09-02	34	13	P_20	EC 693358	Control	4	2	736.83	426.44	1633.55	1207.11	0.74
159	2022-07-30	2022-08-20	2022-09-02	34	13	P_20	EC 693358	Control	4	3	679.7	411.34	1681.79	1270.45	0.76
160	2022-07-30	2022-08-20	2022-09-02	34	13	P_24	EC 693358	Stress	4	1	417.87	442.61	1300.45	857.84	0.66
161	2022-07-30	2022-08-20	2022-09-02	34	13	P_24	EC 693358	Stress	4	2	569.01	544.75	1382.82	838.07	0.61
162	2022-07-30	2022-08-20	2022-09-02	34	13	P_24	EC 693358	Stress	4	3	593.4	595.61	1588.4	992.79	0.63
163	2022-07-30	2022-08-20	2022-09-02	34	13	P_28	EC 693363	Control	4	1	714.15	456.23	1547.81	1091.58	0.71
164	2022-07-30	2022-08-20	2022-09-02	34	13	P_28	EC 693363	Control	4	2	635.16	469.43	1583.57	1114.14	0.7
165	2022-07-30	2022-08-20	2022-09-02	34	13	P_28	EC 693363	Control	4	3	793.14	443.04	1612.05	1169.01	0.73
166	2022-07-30	2022-08-20	2022-09-02	34	13	P_32	EC 693363	Stress	4	1	772.76	669.78	1900.96	1231.18	0.65
167	2022-07-30	2022-08-20	2022-09-02	34	13	P_32	EC 693363	Stress	4	2	737.27	723.15	1883.66	1160.51	0.62
168	2022-07-30	2022-08-20	2022-09-02	34	13	P_32	EC 693363	Stress	4	3	607.51	690.46	1954.1	1263.64	0.65
169	2022-07-30	2022-08-20	2022-09-02	34	13	P_36	Harsha	Control	4	1	793.7	478.93	1559.56	1080.63	0.69
170	2022-07-30	2022-08-20	2022-09-02	34	13	P_36	Harsha	Control	4	2	793.89	408.02	1628.53	1220.51	0.75
171	2022-07-30	2022-08-20	2022-09-02	34	13	P_36	Harsha	Control	4	3	793.51	390.62	1559.12	1168.5	0.75
172	2022-07-30	2022-08-20	2022-09-02	34	13	P_40	Harsha	Stress	4	1	793.89	567.84	1880.51	1312.67	0.7
173	2022-07-30	2022-08-20	2022-09-02	34	13	P_40	Harsha	Stress	4	2	778.41	497.65	1694.53	1196.88	0.71
174	2022-07-30	2022-08-20	2022-09-02	34	13	P_40	Harsha	Stress	4	3	690.33	524.81	1641.67	1116.86	0.68
175	2022-07-30	2022-08-20	2022-09-02	34	13	P_44	IC 415144	Control	4	1	791.76	417.34	1769.25	1351.91	0.76
176	2022-07-30	2022-08-20	2022-09-02	34	13	P_44	IC 415144	Control	4	2	794.01	421.35	1650.42	1229.07	0.74
177	2022-07-30	2022-08-20	2022-09-02	34	13	P_44	IC 415144	Control	4	3	793.46	398.14	1746.8	1348.66	0.77
178	2022-07-30	2022-08-20	2022-09-02	34	13	P_48	IC 415144	Stress	4	1	793.24	493.67	1797.8	1304.13	0.73
179	2022-07-30	2022-08-20	2022-09-02	34	13	P_48	IC 415144	Stress	4	2	787.42	519.53	1664.7	1145.17	0.69
180	2022-07-30	2022-08-20	2022-09-02	34	13	P_48	IC 415144	Stress	4	3	779.89	498.75	1769.06	1270.31	0.72
181	2022-07-30	2022-08-20	2022-09-02	34	13	P_52	IPM 205-7	Control	4	1	770.96	474.24	1437.66	963.42	0.67
182	2022-07-30	2022-08-20	2022-09-02	34	13	P_52	IPM 205-7	Control	4	2	770.24	442.82	1529.16	1086.34	0.71
183	2022-07-30	2022-08-20	2022-09-02	34	13	P_52	IPM 205-7	Control	4	3	717.61	431.57	1497.54	1065.97	0.71
184	2022-07-30	2022-08-20	2022-09-02	34	13	P_56	IPM 205-7	Stress	4	1	714.11	609.28	1604.37	995.09	0.62
185	2022-07-30	2022-08-20	2022-09-02	34	13	P_56	IPM 205-7	Stress	4	2	617.77	525.76	1488.7	962.94	0.65
186	2022-07-30	2022-08-20	2022-09-02	34	13	P_56	IPM 205-7	Stress	4	3	583.69	580.51	1451.58	871.07	0.6
187	2022-07-30	2022-08-20	2022-09-02	34	13	P_60	NM 94	Control	4	1	757.39	405.66	1583.51	1177.85	0.74
188	2022-07-30	2022-08-20	2022-09-02	34	13	P_60	NM 94	Control	4	2	779.56	499	1685.29	1186.29	0.7
189	2022-07-30	2022-08-20	2022-09-02	34	13	P_60	NM 94	Control	4	3	680.98	458.08	1602.87	1144.79	0.71
190	2022-07-30	2022-08-20	2022-09-02	34	13	P_64	NM 94	Stress	4	1	738.57	547.64	1720.65	1173.01	0.68
191	2022-07-30	2022-08-20	2022-09-02	34	13	P_64	NM 94	Stress	4	2	723.02	595.31	1745.8	1150.49	0.66
192	2022-07-30	2022-08-20	2022-09-02	34	13	P_64	NM 94	Stress	4	3	735.72	596.87	1689.67	1092.8	0.65
193	2022-07-30	2022-08-20	2022-09-02	34	13	P_68	PAU 911	Control	4	1	785.73	439.51	1652.58	1213.07	0.73
194	2022-07-30	2022-08-20	2022-09-02	34	13	P_68	PAU 911	Control	4	2	789.19	386.76	1502.02	1115.26	0.74
195	2022-07-30	2022-08-20	2022-09-02	34	13	P_68	PAU 911	Control	4	3	782.43	358.49	1753.93	1395.44	0.8
196	2022-07-30	2022-08-20	2022-09-02	34	13	P_72	PAU 911	Stress	4	1	347.46	446.06	1497.51	1051.45	0.7
197	2022-07-30	2022-08-20	2022-09-02	34	13	P_72	PAU 911	Stress	4	2	466.56	470.73	1650.88	1180.15	0.71
198	2022-07-30	2022-08-20	2022-09-02	34	13	P_72	PAU 911	Stress	4	3	465.45	448.83	1573.11	1124.28	0.71
199	2022-07-30	2022-08-20	2022-09-02	34	13	P_76	VC 3960-88	Control	4	1	764.33	384.31	1498.09	1113.78	0.74
200	2022-07-30	2022-08-20	2022-09-02	34	13	P_76	VC 3960-88	Control	4	2	751.73	506.54	1626.55	1120.01	0.69
201	2022-07-30	2022-08-20	2022-09-02	34	13	P_76	VC 3960-88	Control	4	3	782.79	444.16	1719.64	1275.48	0.74
202	2022-07-30	2022-08-20	2022-09-02	34	13	P_80	VC 3960-88	Stress	4	1	789.04	575.13	1843.17	1268.04	0.69
203	2022-07-30	2022-08-20	2022-09-02	34	13	P_80	VC 3960-88	Stress	4	2	793.52	581.14	1938.95	1357.81	0.7
204	2022-07-30	2022-08-20	2022-09-02	34	13	P_80	VC 3960-88	Stress	4	3	575.47	591.28	1876.96	1285.68	0.68
205	2022-07-30	2022-08-20	2022-09-02	34	13	P_84	VC 6372 (45-8-1)	Control	4	1	747.95	355.56	1634.83	1279.27	0.78
206	2022-07-30	2022-08-20	2022-09-02	34	13	P_84	VC 6372 (45-8-1)	Control	4	2	790.61	465.69	1758.53	1292.84	0.74
207	2022-07-30	2022-08-20	2022-09-02	34	13	P_84	VC 6372 (45-8-1)	Control	4	3	787.19	538.69	1748.19	1209.5	0.69
208	2022-07-30	2022-08-20	2022-09-02	34	13	P_88	VC 6372 (45-8-1)	Stress	4	1	790.85	696.21	1866.6	1170.39	0.63
209	2022-07-30	2022-08-20	2022-09-02	34	13	P_88	VC 6372 (45-8-1)	Stress	4	2	793	600.3	2087.11	1486.81	0.71
210	2022-07-30	2022-08-20	2022-09-02	34	13	P_88	VC 6372 (45-8-1)	Stress	4	3	794.2	574.83	1821.25	1246.42	0.68
211	2022-07-30	2022-08-20	2022-09-02	34	13	P_92	Vaibhav	Control	4	1	792.7	496.33	1662.17	1165.84	0.7
212	2022-07-30	2022-08-20	2022-09-02	34	13	P_92	Vaibhav	Control	4	2	785.93	394.69	1705.16	1310.47	0.77
213	2022-07-30	2022-08-20	2022-09-02	34	13	P_92	Vaibhav	Control	4	3	778.42	494.23	1731.56	1237.33	0.71
214	2022-07-30	2022-08-20	2022-09-02	34	13	P_96	Vaibhav	Stress	4	1	762.35	552.75	1695.74	1142.99	0.67
215	2022-07-30	2022-08-20	2022-09-02	34	13	P_96	Vaibhav	Stress	4	2	791.98	584.03	1793.05	1209.02	0.67
216	2022-07-30	2022-08-20	2022-09-02	34	13	P_96	Vaibhav	Stress	4	3	656	546.32	1801.3	1254.98	0.7
217	2022-07-30	2022-08-20	2022-09-13	45	24	P_04	EC 693356	Control	4	1	631.4	310.85	1506.69	1195.84	0.79
218	2022-07-30	2022-08-20	2022-09-13	45	24	P_04	EC 693356	Control	4	2	780.25	420.36	1598.45	1178.09	0.74
219	2022-07-30	2022-08-20	2022-09-13	45	24	P_04	EC 693356	Control	4	3	779.66	395.78	1576.29	1180.51	0.75
220	2022-07-30	2022-08-20	2022-09-13	45	24	P_08	EC 693356	Stress	4	1	791.14	553.13	1765.2	1212.07	0.69
221	2022-07-30	2022-08-20	2022-09-13	45	24	P_08	EC 693356	Stress	4	2	778.9	571.6	1927.6	1356	0.7
222	2022-07-30	2022-08-20	2022-09-13	45	24	P_08	EC 693356	Stress	4	3	792.59	521.06	1681.82	1160.76	0.69
223	2022-07-30	2022-08-20	2022-09-13	45	24	P_12	EC 693357	Control	4	1	650.73	504.08	1746.38	1242.3	0.71
224	2022-07-30	2022-08-20	2022-09-13	45	24	P_12	EC 693357	Control	4	2	792.5	505.44	1666.33	1160.89	0.7
225	2022-07-30	2022-08-20	2022-09-13	45	24	P_12	EC 693357	Control	4	3	727.73	481.13	1657.94	1176.81	0.71
226	2022-07-30	2022-08-20	2022-09-13	45	24	P_16	EC 693357	Stress	4	1	787.63	544.89	1558.69	1013.8	0.65
227	2022-07-30	2022-08-20	2022-09-13	45	24	P_16	EC 693357	Stress	4	2	773.45	475.07	1227.01	751.94	0.61
228	2022-07-30	2022-08-20	2022-09-13	45	24	P_16	EC 693357	Stress	4	3	656.31	596.46	1498.52	902.06	0.6
229	2022-07-30	2022-08-20	2022-09-13	45	24	P_20	EC 693358	Control	4	1	752.88	495.63	1732.41	1236.78	0.71
230	2022-07-30	2022-08-20	2022-09-13	45	24	P_20	EC 693358	Control	4	2	786.73	587.92	1570.76	982.84	0.63
231	2022-07-30	2022-08-20	2022-09-13	45	24	P_20	EC 693358	Control	4	3	761.91	426.06	1496.59	1070.53	0.72
232	2022-07-30	2022-08-20	2022-09-13	45	24	P_24	EC 693358	Stress	4	1	747.42	518.51	1151.21	632.7	0.55
233	2022-07-30	2022-08-20	2022-09-13	45	24	P_24	EC 693358	Stress	4	2	662.55	488.41	1153.44	665.03	0.58
234	2022-07-30	2022-08-20	2022-09-13	45	24	P_24	EC 693358	Stress	4	3	750.42	495.7	1262.15	766.45	0.61
235	2022-07-30	2022-08-20	2022-09-13	45	24	P_28	EC 693363	Control	4	1	789.12	560.15	2006.81	1446.66	0.72
236	2022-07-30	2022-08-20	2022-09-13	45	24	P_28	EC 693363	Control	4	2	785.61	575.56	1777.77	1202.21	0.68
237	2022-07-30	2022-08-20	2022-09-13	45	24	P_28	EC 693363	Control	4	3	793.03	579.72	1704.57	1124.85	0.66
238	2022-07-30	2022-08-20	2022-09-13	45	24	P_32	EC 693363	Stress	4	1	779.19	619.29	1495.58	876.29	0.59
239	2022-07-30	2022-08-20	2022-09-13	45	24	P_32	EC 693363	Stress	4	2	745.55	564.05	1308.02	743.97	0.57
240	2022-07-30	2022-08-20	2022-09-13	45	24	P_32	EC 693363	Stress	4	3	782.79	587.04	1241.34	654.3	0.53
241	2022-07-30	2022-08-20	2022-09-13	45	24	P_36	Harsha	Control	4	1	781.08	472.99	1627.46	1154.47	0.71
242	2022-07-30	2022-08-20	2022-09-13	45	24	P_36	Harsha	Control	4	2	777.11	367.53	1690.66	1323.13	0.78
243	2022-07-30	2022-08-20	2022-09-13	45	24	P_36	Harsha	Control	4	3	792.47	448.58	1603.54	1154.96	0.72
244	2022-07-30	2022-08-20	2022-09-13	45	24	P_40	Harsha	Stress	4	1	793.41	639.85	1867.87	1228.02	0.66
245	2022-07-30	2022-08-20	2022-09-13	45	24	P_40	Harsha	Stress	4	2	525.07	643.69	1863.01	1219.32	0.65
246	2022-07-30	2022-08-20	2022-09-13	45	24	P_40	Harsha	Stress	4	3	751.35	691.53	1880.68	1189.15	0.63
247	2022-07-30	2022-08-20	2022-09-13	45	24	P_44	IC 415144	Control	4	1	636.77	413.26	1746.65	1333.39	0.76
248	2022-07-30	2022-08-20	2022-09-13	45	24	P_44	IC 415144	Control	4	2	742.75	408.8	1692.86	1284.06	0.76
249	2022-07-30	2022-08-20	2022-09-13	45	24	P_44	IC 415144	Control	4	3	575	413.96	1660.56	1246.6	0.75
250	2022-07-30	2022-08-20	2022-09-13	45	24	P_48	IC 415144	Stress	4	1	758.8	511.77	1631.14	1119.37	0.69
251	2022-07-30	2022-08-20	2022-09-13	45	24	P_48	IC 415144	Stress	4	2	767	607.45	1814.09	1206.64	0.67
252	2022-07-30	2022-08-20	2022-09-13	45	24	P_48	IC 415144	Stress	4	3	679.99	473.84	1615.98	1142.14	0.71
253	2022-07-30	2022-08-20	2022-09-13	45	24	P_52	IPM 205-7	Control	4	1	777.89	478.21	1503.98	1025.77	0.68
254	2022-07-30	2022-08-20	2022-09-13	45	24	P_52	IPM 205-7	Control	4	2	787.11	408.1	1393.06	984.96	0.71
255	2022-07-30	2022-08-20	2022-09-13	45	24	P_52	IPM 205-7	Control	4	3	773.79	470.1	1416.11	946.01	0.67
256	2022-07-30	2022-08-20	2022-09-13	45	24	P_56	IPM 205-7	Stress	4	1	401.54	492.13	1108.78	616.65	0.56
257	2022-07-30	2022-08-20	2022-09-13	45	24	P_56	IPM 205-7	Stress	4	2	384.47	521.19	1103.13	581.94	0.53
258	2022-07-30	2022-08-20	2022-09-13	45	24	P_56	IPM 205-7	Stress	4	3	483.96	597.52	1407.28	809.76	0.58
259	2022-07-30	2022-08-20	2022-09-13	45	24	P_60	NM 94	Control	4	1	764.76	390.5	1336.33	945.83	0.71
260	2022-07-30	2022-08-20	2022-09-13	45	24	P_60	NM 94	Control	4	2	774.71	325.52	1429.02	1103.5	0.77
261	2022-07-30	2022-08-20	2022-09-13	45	24	P_60	NM 94	Control	4	3	782.98	326.6	1412.94	1086.34	0.77
262	2022-07-30	2022-08-20	2022-09-13	45	24	P_64	NM 94	Stress	4	1	760.8	672.3	1732.14	1059.84	0.61
263	2022-07-30	2022-08-20	2022-09-13	45	24	P_64	NM 94	Stress	4	2	740.75	612.63	1670.5	1057.87	0.63
264	2022-07-30	2022-08-20	2022-09-13	45	24	P_64	NM 94	Stress	4	3	773.42	674.55	1730.29	1055.74	0.61
265	2022-07-30	2022-08-20	2022-09-13	45	24	P_68	PAU 911	Control	4	1	780.11	411.1	1751.36	1340.26	0.77
266	2022-07-30	2022-08-20	2022-09-13	45	24	P_68	PAU 911	Control	4	2	745.37	434.79	1538.62	1103.83	0.72
267	2022-07-30	2022-08-20	2022-09-13	45	24	P_68	PAU 911	Control	4	3	757.59	369.09	1476.81	1107.72	0.75
268	2022-07-30	2022-08-20	2022-09-13	45	24	P_72	PAU 911	Stress	4	1	784.84	486.55	1627.95	1141.4	0.7
269	2022-07-30	2022-08-20	2022-09-13	45	24	P_72	PAU 911	Stress	4	2	777.65	470.71	1406.49	935.78	0.67
270	2022-07-30	2022-08-20	2022-09-13	45	24	P_72	PAU 911	Stress	4	3	762.9	517.33	1446.49	929.16	0.64
271	2022-07-30	2022-08-20	2022-09-13	45	24	P_76	VC 3960-88	Control	4	1	771.17	433.56	1631.45	1197.89	0.73
272	2022-07-30	2022-08-20	2022-09-13	45	24	P_76	VC 3960-88	Control	4	2	792.8	398.36	1572.38	1174.02	0.75
273	2022-07-30	2022-08-20	2022-09-13	45	24	P_76	VC 3960-88	Control	4	3	772.89	343.73	1564.89	1221.16	0.78
274	2022-07-30	2022-08-20	2022-09-13	45	24	P_80	VC 3960-88	Stress	4	1	702.94	432.39	1277.96	845.57	0.66
275	2022-07-30	2022-08-20	2022-09-13	45	24	P_80	VC 3960-88	Stress	4	2	749.55	524.56	1322.16	797.6	0.6
276	2022-07-30	2022-08-20	2022-09-13	45	24	P_80	VC 3960-88	Stress	4	3	793.2	432.6	1213.17	780.57	0.64
277	2022-07-30	2022-08-20	2022-09-13	45	24	P_84	VC 6372 (45-8-1)	Control	4	1	786.99	610.39	1785.05	1174.66	0.66
278	2022-07-30	2022-08-20	2022-09-13	45	24	P_84	VC 6372 (45-8-1)	Control	4	2	744.58	426.39	1776.95	1350.56	0.76
279	2022-07-30	2022-08-20	2022-09-13	45	24	P_84	VC 6372 (45-8-1)	Control	4	3	754.22	458.89	1808.16	1349.27	0.75
280	2022-07-30	2022-08-20	2022-09-13	45	24	P_88	VC 6372 (45-8-1)	Stress	4	1	741.78	503.53	1314.77	811.24	0.62
281	2022-07-30	2022-08-20	2022-09-13	45	24	P_88	VC 6372 (45-8-1)	Stress	4	2	748.28	516.04	1232.13	716.09	0.58
282	2022-07-30	2022-08-20	2022-09-13	45	24	P_88	VC 6372 (45-8-1)	Stress	4	3	785.35	516.09	1394.67	878.58	0.63
283	2022-07-30	2022-08-20	2022-09-13	45	24	P_92	Vaibhav	Control	4	1	788.42	418.74	1878.38	1459.64	0.78
284	2022-07-30	2022-08-20	2022-09-13	45	24	P_92	Vaibhav	Control	4	2	790.51	403.71	1814.51	1410.8	0.78
285	2022-07-30	2022-08-20	2022-09-13	45	24	P_92	Vaibhav	Control	4	3	787.31	588.79	1849.11	1260.32	0.68
286	2022-07-30	2022-08-20	2022-09-13	45	24	P_96	Vaibhav	Stress	4	1	789.39	462.84	1319.16	856.32	0.65
287	2022-07-30	2022-08-20	2022-09-13	45	24	P_96	Vaibhav	Stress	4	2	791.99	454.9	1378.36	923.46	0.67
288	2022-07-30	2022-08-20	2022-09-13	45	24	P_96	Vaibhav	Stress	4	3	784.37	453.31	1212.76	759.45	0.63
289	2022-07-30	2022-08-20	2022-09-19	51	30	P_04	EC 693356	Control	4	1	758.67	355.6	1495.45	1139.85	0.76
290	2022-07-30	2022-08-20	2022-09-19	51	30	P_04	EC 693356	Control	4	2	675.7	323.64	1503.77	1180.13	0.78
291	2022-07-30	2022-08-20	2022-09-19	51	30	P_04	EC 693356	Control	4	3	732.61	354.13	1572.82	1218.69	0.77
292	2022-07-30	2022-08-20	2022-09-19	51	30	P_08	EC 693356	Stress	4	1	482.06	322.89	1040.79	717.9	0.69
293	2022-07-30	2022-08-20	2022-09-19	51	30	P_08	EC 693356	Stress	4	2	477.44	380.06	1010.24	630.18	0.62
294	2022-07-30	2022-08-20	2022-09-19	51	30	P_08	EC 693356	Stress	4	3	499.69	351.48	1025.51	674.03	0.66
295	2022-07-30	2022-08-20	2022-09-19	51	30	P_12	EC 693357	Control	4	1	789.75	556.82	2050.34	1493.52	0.73
296	2022-07-30	2022-08-20	2022-09-19	51	30	P_12	EC 693357	Control	4	2	790.95	484.48	1810.6	1326.12	0.73
297	2022-07-30	2022-08-20	2022-09-19	51	30	P_12	EC 693357	Control	4	3	644.96	420.79	1670.85	1250.06	0.75
298	2022-07-30	2022-08-20	2022-09-19	51	30	P_16	EC 693357	Stress	4	1	761.85	692.38	1587.13	894.75	0.56
299	2022-07-30	2022-08-20	2022-09-19	51	30	P_16	EC 693357	Stress	4	2	789.13	650.84	1593.55	942.71	0.59
300	2022-07-30	2022-08-20	2022-09-19	51	30	P_16	EC 693357	Stress	4	3	697.39	524.05	1391.5	867.45	0.62
301	2022-07-30	2022-08-20	2022-09-19	51	30	P_20	EC 693358	Control	4	1	629.55	557.45	2089.03	1531.58	0.73
302	2022-07-30	2022-08-20	2022-09-19	51	30	P_20	EC 693358	Control	4	2	716.75	533.44	2114.23	1580.79	0.75
303	2022-07-30	2022-08-20	2022-09-19	51	30	P_20	EC 693358	Control	4	3	776.94	486.05	1875.4	1389.35	0.74
304	2022-07-30	2022-08-20	2022-09-19	51	30	P_24	EC 693358	Stress	4	1	658.64	527.95	1104.06	576.11	0.52
305	2022-07-30	2022-08-20	2022-09-19	51	30	P_24	EC 693358	Stress	4	2	711.39	640.56	1121.3	480.74	0.43
306	2022-07-30	2022-08-20	2022-09-19	51	30	P_24	EC 693358	Stress	4	3	502.29	531.44	1108.88	577.44	0.52
307	2022-07-30	2022-08-20	2022-09-19	51	30	P_28	EC 693363	Control	4	1	140.25	487.72	1723.54	1235.82	0.72
308	2022-07-30	2022-08-20	2022-09-19	51	30	P_28	EC 693363	Control	4	2	732.46	532.16	1849.07	1316.91	0.71
309	2022-07-30	2022-08-20	2022-09-19	51	30	P_28	EC 693363	Control	4	3	765.62	500.76	1718.96	1218.2	0.71
310	2022-07-30	2022-08-20	2022-09-19	51	30	P_32	EC 693363	Stress	4	1	673.12	589.41	1328.56	739.15	0.56
311	2022-07-30	2022-08-20	2022-09-19	51	30	P_32	EC 693363	Stress	4	2	752.76	591.38	1256.9	665.52	0.53
312	2022-07-30	2022-08-20	2022-09-19	51	30	P_32	EC 693363	Stress	4	3	674.67	578.83	1246.41	667.58	0.54
313	2022-07-30	2022-08-20	2022-09-19	51	30	P_36	Harsha	Control	4	1	630.57	543.33	2056.23	1512.9	0.74
314	2022-07-30	2022-08-20	2022-09-19	51	30	P_36	Harsha	Control	4	2	654.66	487.75	1938.24	1450.49	0.75
315	2022-07-30	2022-08-20	2022-09-19	51	30	P_36	Harsha	Control	4	3	734.83	563.09	2085.01	1521.92	0.73
316	2022-07-30	2022-08-20	2022-09-19	51	30	P_40	Harsha	Stress	4	1	786.14	578.63	1441.27	862.64	0.6
317	2022-07-30	2022-08-20	2022-09-19	51	30	P_40	Harsha	Stress	4	2	781.84	620.62	1701.08	1080.46	0.64
318	2022-07-30	2022-08-20	2022-09-19	51	30	P_40	Harsha	Stress	4	3	755.84	527.05	1423.81	896.76	0.63
319	2022-07-30	2022-08-20	2022-09-19	51	30	P_44	IC 415144	Control	4	1	778.85	409.29	1640.15	1230.86	0.75
320	2022-07-30	2022-08-20	2022-09-19	51	30	P_44	IC 415144	Control	4	2	637.25	468.79	1960.89	1492.1	0.76
321	2022-07-30	2022-08-20	2022-09-19	51	30	P_44	IC 415144	Control	4	3	523.92	417.17	1808.48	1391.31	0.77
322	2022-07-30	2022-08-20	2022-09-19	51	30	P_48	IC 415144	Stress	4	1	2.29	316.38	903.39	587.01	0.65
323	2022-07-30	2022-08-20	2022-09-19	51	30	P_48	IC 415144	Stress	4	2	683.55	208.9	665.36	456.46	0.69
324	2022-07-30	2022-08-20	2022-09-19	51	30	P_48	IC 415144	Stress	4	3	22.94	330.39	963.57	633.18	0.66
325	2022-07-30	2022-08-20	2022-09-19	51	30	P_52	IPM 205-7	Control	4	1	785.72	548.61	2082.19	1533.58	0.74
326	2022-07-30	2022-08-20	2022-09-19	51	30	P_52	IPM 205-7	Control	4	2	684.64	473.27	1803.4	1330.13	0.74
327	2022-07-30	2022-08-20	2022-09-19	51	30	P_52	IPM 205-7	Control	4	3	782.58	454.78	1619.58	1164.8	0.72
328	2022-07-30	2022-08-20	2022-09-19	51	30	P_56	IPM 205-7	Stress	4	1	632.68	542.17	1139.53	597.36	0.52
329	2022-07-30	2022-08-20	2022-09-19	51	30	P_56	IPM 205-7	Stress	4	2	682.99	598.8	1193.83	595.03	0.5
330	2022-07-30	2022-08-20	2022-09-19	51	30	P_56	IPM 205-7	Stress	4	3	688.55	552.95	1207.23	654.28	0.54
331	2022-07-30	2022-08-20	2022-09-19	51	30	P_60	NM 94	Control	4	1	789.72	577.26	1963.38	1386.12	0.71
332	2022-07-30	2022-08-20	2022-09-19	51	30	P_60	NM 94	Control	4	2	778.22	446.9	1519.93	1073.03	0.71
333	2022-07-30	2022-08-20	2022-09-19	51	30	P_60	NM 94	Control	4	3	768.23	444.83	1640.09	1195.26	0.73
334	2022-07-30	2022-08-20	2022-09-19	51	30	P_64	NM 94	Stress	4	1	192.55	665.9	1417.01	751.11	0.53
335	2022-07-30	2022-08-20	2022-09-19	51	30	P_64	NM 94	Stress	4	2	139.28	449.41	1000.45	551.04	0.55
336	2022-07-30	2022-08-20	2022-09-19	51	30	P_64	NM 94	Stress	4	3	160.79	597.85	1279.22	681.37	0.53
337	2022-07-30	2022-08-20	2022-09-19	51	30	P_68	PAU 911	Control	4	1	147.39	388.9	1744.17	1355.27	0.78
338	2022-07-30	2022-08-20	2022-09-19	51	30	P_68	PAU 911	Control	4	2	160.07	411.54	1745.52	1333.98	0.76
339	2022-07-30	2022-08-20	2022-09-19	51	30	P_68	PAU 911	Control	4	3	166.32	448.86	1778.13	1329.27	0.75
340	2022-07-30	2022-08-20	2022-09-19	51	30	P_72	PAU 911	Stress	4	1	148.52	471.01	1255.84	784.83	0.62
341	2022-07-30	2022-08-20	2022-09-19	51	30	P_72	PAU 911	Stress	4	2	135.04	595.87	1754.66	1158.79	0.66
342	2022-07-30	2022-08-20	2022-09-19	51	30	P_72	PAU 911	Stress	4	3	174.95	440.19	1258.13	817.94	0.65
343	2022-07-30	2022-08-20	2022-09-19	51	30	P_76	VC 3960-88	Control	4	1	679.23	444.88	1627.57	1182.69	0.73
344	2022-07-30	2022-08-20	2022-09-19	51	30	P_76	VC 3960-88	Control	4	2	734.58	372.14	1582.77	1210.63	0.76
345	2022-07-30	2022-08-20	2022-09-19	51	30	P_76	VC 3960-88	Control	4	3	714.49	376.68	1565.86	1189.18	0.76
346	2022-07-30	2022-08-20	2022-09-19	51	30	P_80	VC 3960-88	Stress	4	1	656.83	472.19	1255.01	782.82	0.62
347	2022-07-30	2022-08-20	2022-09-19	51	30	P_80	VC 3960-88	Stress	4	2	786.81	513.69	1317.03	803.34	0.61
348	2022-07-30	2022-08-20	2022-09-19	51	30	P_80	VC 3960-88	Stress	4	3	775.55	529.3	1342.63	813.33	0.61
349	2022-07-30	2022-08-20	2022-09-19	51	30	P_84	VC 6372 (45-8-1)	Control	4	1	779.6	444.33	1689.83	1245.5	0.74
350	2022-07-30	2022-08-20	2022-09-19	51	30	P_84	VC 6372 (45-8-1)	Control	4	2	774.66	478.83	1783.68	1304.85	0.73
351	2022-07-30	2022-08-20	2022-09-19	51	30	P_84	VC 6372 (45-8-1)	Control	4	3	721.02	388.47	1379.3	990.83	0.72
352	2022-07-30	2022-08-20	2022-09-19	51	30	P_88	VC 6372 (45-8-1)	Stress	4	1	782.62	589.7	1251.46	661.76	0.53
353	2022-07-30	2022-08-20	2022-09-19	51	30	P_88	VC 6372 (45-8-1)	Stress	4	2	769.91	602.85	1277.77	674.92	0.53
354	2022-07-30	2022-08-20	2022-09-19	51	30	P_88	VC 6372 (45-8-1)	Stress	4	3	716.43	571.19	1411.75	840.56	0.6
355	2022-07-30	2022-08-20	2022-09-19	51	30	P_92	Vaibhav	Control	4	1	781.34	535.35	1933.75	1398.4	0.72
356	2022-07-30	2022-08-20	2022-09-19	51	30	P_92	Vaibhav	Control	4	2	788.69	509.97	1996.15	1486.18	0.74
357	2022-07-30	2022-08-20	2022-09-19	51	30	P_92	Vaibhav	Control	4	3	791.88	527.78	1916.51	1388.73	0.72
358	2022-07-30	2022-08-20	2022-09-19	51	30	P_96	Vaibhav	Stress	4	1	792.28	383.41	1031.72	648.31	0.63
359	2022-07-30	2022-08-20	2022-09-19	51	30	P_96	Vaibhav	Stress	4	2	784.62	369.82	1006.08	636.26	0.63
360	2022-07-30	2022-08-20	2022-09-19	51	30	P_96	Vaibhav	Stress	4	3	770.89	449.15	1091.34	642.19	0.59
361	2022-07-30	2022-08-20	2022-09-24	56	35	P_04	EC 693356	Control	4	1	780.24	521.19	1970.09	1448.9	0.74
362	2022-07-30	2022-08-20	2022-09-24	56	35	P_04	EC 693356	Control	4	2	791.6	540.79	2130.31	1589.52	0.75
363	2022-07-30	2022-08-20	2022-09-24	56	35	P_04	EC 693356	Control	4	3	782.43	487.04	2018.44	1531.4	0.76
364	2022-07-30	2022-08-20	2022-09-24	56	35	P_08	EC 693356	Stress	4	1	724.73	769.16	1876.05	1106.89	0.59
365	2022-07-30	2022-08-20	2022-09-24	56	35	P_08	EC 693356	Stress	4	2	687.6	641.09	1566.07	924.98	0.59
366	2022-07-30	2022-08-20	2022-09-24	56	35	P_08	EC 693356	Stress	4	3	725.67	555.36	1478.02	922.66	0.62
367	2022-07-30	2022-08-20	2022-09-24	56	35	P_12	EC 693357	Control	4	1	773.29	449.13	1684.82	1235.69	0.73
368	2022-07-30	2022-08-20	2022-09-24	56	35	P_12	EC 693357	Control	4	2	782.47	459.31	1600.9	1141.59	0.71
369	2022-07-30	2022-08-20	2022-09-24	56	35	P_12	EC 693357	Control	4	3	785.98	444.96	1729.85	1284.89	0.74
370	2022-07-30	2022-08-20	2022-09-24	56	35	P_16	EC 693357	Stress	4	1	294.13	554.95	1002.16	447.21	0.45
371	2022-07-30	2022-08-20	2022-09-24	56	35	P_16	EC 693357	Stress	4	2	550.36	609.48	1003.83	394.35	0.39
372	2022-07-30	2022-08-20	2022-09-24	56	35	P_16	EC 693357	Stress	4	3	669.75	600.91	1085	484.09	0.45
373	2022-07-30	2022-08-20	2022-09-24	56	35	P_20	EC 693358	Control	4	1	737.57	480.63	1797.24	1316.61	0.73
374	2022-07-30	2022-08-20	2022-09-24	56	35	P_20	EC 693358	Control	4	2	778.87	465.29	1693.31	1228.02	0.73
375	2022-07-30	2022-08-20	2022-09-24	56	35	P_20	EC 693358	Control	4	3	745.74	485.67	1838.65	1352.98	0.74
376	2022-07-30	2022-08-20	2022-09-24	56	35	P_24	EC 693358	Stress	4	1	790.63	684.92	1025.62	340.7	0.33
377	2022-07-30	2022-08-20	2022-09-24	56	35	P_24	EC 693358	Stress	4	2	792.85	871.88	1492.71	620.83	0.42
378	2022-07-30	2022-08-20	2022-09-24	56	35	P_24	EC 693358	Stress	4	3	793.1	740.49	1094.96	354.47	0.32
379	2022-07-30	2022-08-20	2022-09-24	56	35	P_28	EC 693363	Control	4	1	793.95	475.75	1625.23	1149.48	0.71
380	2022-07-30	2022-08-20	2022-09-24	56	35	P_28	EC 693363	Control	4	2	793.29	392.7	1505.45	1112.75	0.74
381	2022-07-30	2022-08-20	2022-09-24	56	35	P_28	EC 693363	Control	4	3	789.69	384.75	1441.72	1056.97	0.73
382	2022-07-30	2022-08-20	2022-09-24	56	35	P_32	EC 693363	Stress	4	1	546.42	693.26	1008.81	315.55	0.31
383	2022-07-30	2022-08-20	2022-09-24	56	35	P_32	EC 693363	Stress	4	2	526.14	628.4	1003.09	374.69	0.37
384	2022-07-30	2022-08-20	2022-09-24	56	35	P_32	EC 693363	Stress	4	3	676.96	605.26	1001.13	395.87	0.4
385	2022-07-30	2022-08-20	2022-09-24	56	35	P_36	Harsha	Control	4	1	791.95	449.9	1700.65	1250.75	0.74
386	2022-07-30	2022-08-20	2022-09-24	56	35	P_36	Harsha	Control	4	2	787.6	456.17	1609.17	1153	0.72
387	2022-07-30	2022-08-20	2022-09-24	56	35	P_36	Harsha	Control	4	3	766.22	458.83	1692.78	1233.95	0.73
388	2022-07-30	2022-08-20	2022-09-24	56	35	P_40	Harsha	Stress	4	1	759.6	548.24	1108.26	560.02	0.51
389	2022-07-30	2022-08-20	2022-09-24	56	35	P_40	Harsha	Stress	4	2	792.56	545.57	1203.44	657.87	0.55
390	2022-07-30	2022-08-20	2022-09-24	56	35	P_40	Harsha	Stress	4	3	763.25	529.86	1005.48	475.62	0.47
391	2022-07-30	2022-08-20	2022-09-24	56	35	P_44	IC 415144	Control	4	1	396.65	490.56	1836.19	1345.63	0.73
392	2022-07-30	2022-08-20	2022-09-24	56	35	P_44	IC 415144	Control	4	2	736.15	396.88	1571.65	1174.77	0.75
393	2022-07-30	2022-08-20	2022-09-24	56	35	P_44	IC 415144	Control	4	3	677.83	455.2	1840.14	1384.94	0.75
394	2022-07-30	2022-08-20	2022-09-24	56	35	P_48	IC 415144	Stress	4	1	704.47	588.95	1423.53	834.58	0.59
395	2022-07-30	2022-08-20	2022-09-24	56	35	P_48	IC 415144	Stress	4	2	741.98	622.06	1540.96	918.9	0.6
396	2022-07-30	2022-08-20	2022-09-24	56	35	P_48	IC 415144	Stress	4	3	716.7	611.7	1518.67	906.97	0.6
397	2022-07-30	2022-08-20	2022-09-24	56	35	P_52	IPM 205-7	Control	4	1	753.09	414.1	1492.49	1078.39	0.72
398	2022-07-30	2022-08-20	2022-09-24	56	35	P_52	IPM 205-7	Control	4	2	779.81	419.38	1611.91	1192.53	0.74
399	2022-07-30	2022-08-20	2022-09-24	56	35	P_52	IPM 205-7	Control	4	3	784.12	369.93	1382.24	1012.31	0.73
400	2022-07-30	2022-08-20	2022-09-24	56	35	P_56	IPM 205-7	Stress	4	1	541.26	693	1001.1	308.1	0.31
401	2022-07-30	2022-08-20	2022-09-24	56	35	P_56	IPM 205-7	Stress	4	2	777.2	690.77	1023.37	332.6	0.33
402	2022-07-30	2022-08-20	2022-09-24	56	35	P_56	IPM 205-7	Stress	4	3	598.61	698.63	1006.76	308.13	0.31
403	2022-07-30	2022-08-20	2022-09-24	56	35	P_60	NM 94	Control	4	1	531.48	533.59	1812.79	1279.2	0.71
404	2022-07-30	2022-08-20	2022-09-24	56	35	P_60	NM 94	Control	4	2	786.01	584.89	1982.87	1397.98	0.71
405	2022-07-30	2022-08-20	2022-09-24	56	35	P_60	NM 94	Control	4	3	568.13	541.74	1930.44	1388.7	0.72
406	2022-07-30	2022-08-20	2022-09-24	56	35	P_64	NM 94	Stress	4	1	706.73	543.13	1005.47	462.34	0.46
407	2022-07-30	2022-08-20	2022-09-24	56	35	P_64	NM 94	Stress	4	2	781.17	589.45	1004.12	414.67	0.41
408	2022-07-30	2022-08-20	2022-09-24	56	35	P_64	NM 94	Stress	4	3	648.56	480.6	901.25	420.65	0.47
409	2022-07-30	2022-08-20	2022-09-24	56	35	P_68	PAU 911	Control	4	1	768.88	502.03	1751.56	1249.53	0.71
410	2022-07-30	2022-08-20	2022-09-24	56	35	P_68	PAU 911	Control	4	2	752.77	508.92	1858.59	1349.67	0.73
411	2022-07-30	2022-08-20	2022-09-24	56	35	P_68	PAU 911	Control	4	3	769.34	523.89	2045.02	1521.13	0.74
412	2022-07-30	2022-08-20	2022-09-24	56	35	P_72	PAU 911	Stress	4	1	777.87	560.62	1233	672.38	0.55
413	2022-07-30	2022-08-20	2022-09-24	56	35	P_72	PAU 911	Stress	4	2	740.29	718.92	1527.95	809.03	0.53
414	2022-07-30	2022-08-20	2022-09-24	56	35	P_72	PAU 911	Stress	4	3	734.47	577.46	1442.8	865.34	0.6
415	2022-07-30	2022-08-20	2022-09-24	56	35	P_76	VC 3960-88	Control	4	1	750.75	519.47	1817.81	1298.34	0.71
416	2022-07-30	2022-08-20	2022-09-24	56	35	P_76	VC 3960-88	Control	4	2	747.58	565.3	1879.34	1314.04	0.7
417	2022-07-30	2022-08-20	2022-09-24	56	35	P_76	VC 3960-88	Control	4	3	785.56	597.04	2174.26	1577.22	0.73
418	2022-07-30	2022-08-20	2022-09-24	56	35	P_80	VC 3960-88	Stress	4	1	773.74	836.9	1577.51	740.61	0.47
419	2022-07-30	2022-08-20	2022-09-24	56	35	P_80	VC 3960-88	Stress	4	2	758.41	817.77	1678.18	860.41	0.51
420	2022-07-30	2022-08-20	2022-09-24	56	35	P_80	VC 3960-88	Stress	4	3	763.47	543.05	1105.23	562.18	0.51
421	2022-07-30	2022-08-20	2022-09-24	56	35	P_84	VC 6372 (45-8-1)	Control	4	1	779.56	484.68	1770.77	1286.09	0.73
422	2022-07-30	2022-08-20	2022-09-24	56	35	P_84	VC 6372 (45-8-1)	Control	4	2	749.34	524.37	1874.25	1349.88	0.72
423	2022-07-30	2022-08-20	2022-09-24	56	35	P_84	VC 6372 (45-8-1)	Control	4	3	792.96	555.86	2161.13	1605.27	0.74
424	2022-07-30	2022-08-20	2022-09-24	56	35	P_88	VC 6372 (45-8-1)	Stress	4	1	753.67	699.36	1153.93	454.57	0.39
425	2022-07-30	2022-08-20	2022-09-24	56	35	P_88	VC 6372 (45-8-1)	Stress	4	2	752.86	627.01	1108.83	481.82	0.43
426	2022-07-30	2022-08-20	2022-09-24	56	35	P_88	VC 6372 (45-8-1)	Stress	4	3	748.43	531.67	1007	475.33	0.47
427	2022-07-30	2022-08-20	2022-09-24	56	35	P_92	Vaibhav	Control	4	1	765.93	505.39	1826.32	1320.93	0.72
428	2022-07-30	2022-08-20	2022-09-24	56	35	P_92	Vaibhav	Control	4	2	774.24	454.59	1887.4	1432.81	0.76
429	2022-07-30	2022-08-20	2022-09-24	56	35	P_92	Vaibhav	Control	4	3	735.5	523.85	1795.78	1271.93	0.71
430	2022-07-30	2022-08-20	2022-09-24	56	35	P_96	Vaibhav	Stress	4	1	723.85	616.51	1318.04	701.53	0.53
431	2022-07-30	2022-08-20	2022-09-24	56	35	P_96	Vaibhav	Stress	4	2	658.39	626.12	1313.51	687.39	0.52
432	2022-07-30	2022-08-20	2022-09-24	56	35	P_96	Vaibhav	Stress	4	3	691.12	521.31	1365.77	844.46	0.62

## Sheet: graph_for_slide
DASI	0
	Column Labels
	Control			Stress
Row Labels	Average of QY_max	StdDev of QY_max	Count of QY_max	Average of QY_max	StdDev of QY_max	Count of QY_max	C SE	S SE		Control	Stress
PAU 911	0.78	1.49012e-08	3	0.733333	0.0057735	3	8.60319e-09	0.00333333	PAU 911	0.78	0.733333
Harsha	0.786667	0.0057735	3	0.746667	0.0057735	3	0.00333333	0.00333333	Harsha	0.786667	0.746667
EC 693356	0.756667	0.0057735	3	0.746667	0.0321455	3	0.00333333	0.0185592	EC 693356	0.756667	0.746667
NM 94	0.75	0.034641	3	0.746667	0.0152753	3	0.02	0.00881917	NM 94	0.75	0.746667
IPM 205-7	0.783333	0.0152753	3	0.756667	0.011547	3	0.00881917	0.00666667	IPM 205-7	0.783333	0.756667
Vaibhav	0.783333	0.0057735	3	0.76	0.01	3	0.00333333	0.0057735	Vaibhav	0.783333	0.76
VC 6372 (45-8-1)	0.766667	0.0321455	3	0.77	0.02	3	0.0185592	0.011547	VC 6372 (45-8-1)	0.766667	0.77
EC 693358	0.773333	0.0057735	3	0.773333	0.0152753	3	0.00333333	0.00881917	EC 693358	0.773333	0.773333
VC 3960-88	0.766667	0.0351188	3	0.773333	0.0208167	3	0.0202759	0.0120185	VC 3960-88	0.766667	0.773333
IC 415144	0.786667	0.011547	3	0.776667	0.0152753	3	0.00666667	0.00881917	IC 415144	0.786667	0.776667
EC 693357	0.79	1.05367e-08	3	0.78	0.01	3	6.08337e-09	0.0057735	EC 693357	0.79	0.78
EC 693363	0.766667	0.011547	3	0.793333	0.011547	3	0.00666667	0.00666667	EC 693363	0.766667	0.793333
DASI	9
	Column Labels
	Control			Stress
Row Labels	Average of QY_max	StdDev of QY_max	Count of QY_max	Average of QY_max	StdDev of QY_max	Count of QY_max	C SE	S SE		Control	Stress
EC 693358	0.726667	0.023094	3	0.656667	0.0057735	3	0.0133333	0.00333333	EC 693358	0.726667	0.656667
NM 94	0.733333	0.0208167	3	0.67	0.0173205	3	0.0120185	0.01	NM 94	0.733333	0.67
EC 693363	0.753333	0.0057735	3	0.68	0.0173205	3	0.00333333	0.01	EC 693363	0.753333	0.68
IPM 205-7	0.766667	0.011547	3	0.68	0.0173205	3	0.00666667	0.01	IPM 205-7	0.766667	0.68
EC 693357	0.713333	0.0208167	3	0.683333	0.0404145	3	0.0120185	0.0233333	EC 693357	0.713333	0.683333
VC 6372 (45-8-1)	0.75	0.01	3	0.696667	0.0251661	3	0.0057735	0.0145297	VC 6372 (45-8-1)	0.75	0.696667
Vaibhav	0.75	0.034641	3	0.7	0.034641	3	0.02	0.02	Vaibhav	0.75	0.7
Harsha	0.773333	0.011547	3	0.716667	0.0152753	3	0.00666667	0.00881917	Harsha	0.773333	0.716667
VC 3960-88	0.74	0.02	3	0.723333	0.0152753	3	0.011547	0.00881917	VC 3960-88	0.74	0.723333
PAU 911	0.74	0.01	3	0.726667	0.0057735	3	0.0057735	0.00333333	PAU 911	0.74	0.726667
IC 415144	0.74	1.05367e-08	3	0.733333	0.0152753	3	6.08337e-09	0.00881917	IC 415144	0.74	0.733333
EC 693356	0.743333	0.0057735	3	0.74	0.01	3	0.00333333	0.0057735	EC 693356	0.743333	0.74
DASI	13
	Column Labels
	Control			Stress
Row Labels	Average of QY_max	StdDev of QY_max	Count of QY_max	Average of QY_max	StdDev of QY_max	Count of QY_max	C SE	S SE		Control	Stress
IPM 205-7	0.696667	0.023094	3	0.623333	0.0251661	3	0.0133333	0.0145297	IPM 205-7	0.696667	0.623333
EC 693358	0.74	0.02	3	0.633333	0.0251661	3	0.011547	0.0145297	EC 693358	0.74	0.633333
EC 693363	0.713333	0.0152753	3	0.64	0.0173205	3	0.00881917	0.01	EC 693363	0.713333	0.64
NM 94	0.716667	0.0208167	3	0.663333	0.0152753	3	0.0120185	0.00881917	NM 94	0.716667	0.663333
VC 6372 (45-8-1)	0.736667	0.0450925	3	0.673333	0.0404145	3	0.0260342	0.0233333	VC 6372 (45-8-1)	0.736667	0.673333
EC 693357	0.716667	0.011547	3	0.676667	0.011547	3	0.00666667	0.00666667	EC 693357	0.716667	0.676667
Vaibhav	0.726667	0.0378594	3	0.68	0.0173205	3	0.0218581	0.01	Vaibhav	0.726667	0.68
VC 3960-88	0.723333	0.0288675	3	0.69	0.01	3	0.0166667	0.0057735	VC 3960-88	0.723333	0.69
Harsha	0.73	0.034641	3	0.696667	0.0152753	3	0.02	0.00881917	Harsha	0.73	0.696667
EC 693356	0.74	0.0264575	3	0.703333	0.0378594	3	0.0152753	0.0218581	EC 693356	0.74	0.703333
PAU 911	0.756667	0.0378594	3	0.706667	0.0057735	3	0.0218581	0.00333333	PAU 911	0.756667	0.706667
IC 415144	0.756667	0.0152753	3	0.713333	0.0208167	3	0.00881917	0.0120185	IC 415144	0.756667	0.713333
DASI	24
	Column Labels
	Control			Stress
Row Labels	Average of QY_max	StdDev of QY_max	Count of QY_max	Average of QY_max	StdDev of QY_max	Count of QY_max	C SE	S SE		Control	Stress
IPM 205-7	0.686667	0.0208167	3	0.556667	0.0251661	3	0.0120185	0.0145297	IPM 205-7	0.686667	0.556667
EC 693363	0.686667	0.0305505	3	0.563333	0.0305505	3	0.0176383	0.0176383	EC 693363	0.686667	0.563333
EC 693358	0.686667	0.0493288	3	0.58	0.03	3	0.02848	0.0173205	EC 693358	0.686667	0.58
VC 6372 (45-8-1)	0.723333	0.0550757	3	0.61	0.0264575	3	0.031798	0.0152753	VC 6372 (45-8-1)	0.723333	0.61
NM 94	0.75	0.034641	3	0.616667	0.011547	3	0.02	0.00666667	NM 94	0.75	0.616667
EC 693357	0.706667	0.0057735	3	0.62	0.0264575	3	0.00333333	0.0152753	EC 693357	0.706667	0.62
VC 3960-88	0.753333	0.0251661	3	0.633333	0.0305505	3	0.0145297	0.0176383	VC 3960-88	0.753333	0.633333
Harsha	0.736667	0.0378594	3	0.646667	0.0152753	3	0.0218581	0.00881917	Harsha	0.736667	0.646667
Vaibhav	0.746667	0.057735	3	0.65	0.02	3	0.0333333	0.011547	Vaibhav	0.746667	0.65
PAU 911	0.746667	0.0251661	3	0.67	0.03	3	0.0145297	0.0173205	PAU 911	0.746667	0.67
IC 415144	0.756667	0.0057735	3	0.69	0.02	3	0.00333333	0.011547	IC 415144	0.756667	0.69
EC 693356	0.76	0.0264575	3	0.693333	0.0057735	3	0.0152753	0.00333333	EC 693356	0.76	0.693333
DASI	30
	Column Labels
	Control			Stress
Row Labels	Average of QY_max	StdDev of QY_max	Count of QY_max	Average of QY_max	StdDev of QY_max	Count of QY_max	C SE	S SE		Control	Stress
EC 693358	0.74	0.01	3	0.49	0.0519615	3	0.0057735	0.03	EC 693358	0.74	0.49
IPM 205-7	0.733333	0.011547	3	0.52	0.02	3	0.00666667	0.011547	IPM 205-7	0.733333	0.52
NM 94	0.716667	0.011547	3	0.536667	0.011547	3	0.00666667	0.00666667	NM 94	0.716667	0.536667
EC 693363	0.713333	0.0057735	3	0.543333	0.0152753	3	0.00333333	0.00881917	EC 693363	0.713333	0.543333
VC 6372 (45-8-1)	0.73	0.01	3	0.553333	0.0404145	3	0.0057735	0.0233333	VC 6372 (45-8-1)	0.73	0.553333
EC 693357	0.736667	0.011547	3	0.59	0.03	3	0.00666667	0.0173205	EC 693357	0.736667	0.59
VC 3960-88	0.75	0.0173205	3	0.613333	0.0057735	3	0.01	0.00333333	VC 3960-88	0.75	0.613333
Vaibhav	0.726667	0.011547	3	0.616667	0.023094	3	0.00666667	0.0133333	Vaibhav	0.726667	0.616667
Harsha	0.74	0.01	3	0.623333	0.0208167	3	0.0057735	0.0120185	Harsha	0.74	0.623333
PAU 911	0.763333	0.0152753	3	0.643333	0.0208167	3	0.00881917	0.0120185	PAU 911	0.763333	0.643333
EC 693356	0.77	0.01	3	0.656667	0.0351188	3	0.0057735	0.0202759	EC 693356	0.77	0.656667
IC 415144	0.76	0.01	3	0.666667	0.0208167	3	0.0057735	0.0120185	IC 415144	0.76	0.666667
DASI	35
	Column Labels
	Control			Stress
Row Labels	Average of QY_max	StdDev of QY_max	Count of QY_max	Average of QY_max	StdDev of QY_max	Count of QY_max	C SE	S SE		Control	Stress
IPM 205-7	0.73	0.01	3	0.316667	0.011547	3	0.0057735	0.00666667	IPM 205-7	0.73	0.316667
EC 693358	0.733333	0.0057735	3	0.356667	0.0550757	3	0.00333333	0.031798	EC 693358	0.733333	0.356667
EC 693363	0.726667	0.0152753	3	0.36	0.0458258	3	0.00881917	0.0264575	EC 693363	0.726667	0.36
VC 6372 (45-8-1)	0.73	0.01	3	0.43	0.04	3	0.0057735	0.023094	VC 6372 (45-8-1)	0.73	0.43
EC 693357	0.726667	0.0152753	3	0.43	0.034641	3	0.00881917	0.02	EC 693357	0.726667	0.43
NM 94	0.713333	0.0057735	3	0.446667	0.0321455	3	0.00333333	0.0185592	NM 94	0.713333	0.446667
VC 3960-88	0.713333	0.0152753	3	0.496667	0.023094	3	0.00881917	0.0133333	VC 3960-88	0.713333	0.496667
Harsha	0.73	0.01	3	0.51	0.04	3	0.0057735	0.023094	Harsha	0.73	0.51
Vaibhav	0.73	0.0264575	3	0.556667	0.0550757	3	0.0152753	0.031798	Vaibhav	0.73	0.556667
PAU 911	0.726667	0.0152753	3	0.56	0.0360555	3	0.00881917	0.0208167	PAU 911	0.726667	0.56
IC 415144	0.743333	0.011547	3	0.596667	0.0057735	3	0.00666667	0.00333333	IC 415144	0.743333	0.596667
EC 693356	0.75	0.01	3	0.6	0.0173205	3	0.0057735	0.01	EC 693356	0.75	0.6
DASI	(Multiple Items)
Average of QY_max	Column Labels
Row Labels	Control	Stress
EC 693356	0.753333	0.69
EC 693357	0.731667	0.63
EC 693358	0.733333	0.581667
EC 693363	0.726667	0.596667
Harsha	0.749444	0.656667
IC 415144	0.757222	0.696111
IPM 205-7	0.732778	0.575556
NM 94	0.73	0.613333
PAU 911	0.752222	0.673333
Vaibhav	0.743889	0.660556
VC 3960-88	0.741111	0.655
VC 6372 (45-8-1)	0.739444	0.622222

## Sheet: Yield&Morphologydata_final
Sr. No.	PotID	Genotype	Water treatment	Rep	Sowing date	No. of plants	No. of pods	Seed yield (g)	Podsperplant	Seedyieldperplant (g)	Plant height (cm)	No. of Primary branches
1	P_01	EC-693356	Control	1	2022-07-30	5	61	14.98	12.2	3	57.5	7			Column Labels
2	P_02	EC-693356	Control	2	2022-07-30	5	59	14.36	11.8	2.87	58	5			Control		Stress
3	P_03	EC-693356	Control	3	2022-07-30	5	62	15.29	12.4	3.06	56.5	8		Row Labels	Average of Plant height (cm)	Average of No. of Primary branches	Average of Plant height (cm)	Average of No. of Primary branches
4	P_04	EC-693356	Control	4	2022-07-30	5	52	12.56	10.4	2.51	62	5		EC-693356	58.5	6.25	51.5	6
5	P_05	EC-693356	Stress	1	2022-07-30	5	45	10.85	9	2.17	53.5	6		EC-693357	56	4.75	49	4.5
6	P_06	EC-693356	Stress	2	2022-07-30	5	49	11.73	9.8	2.35	51	6		EC-693358	56	4.75	49	4.5
7	P_07	EC-693356	Stress	3	2022-07-30	5	40	9.44	8	1.89	52.5	7		EC-693363	53.875	5	32.875	4.25
8	P_08	EC-693356	Stress	4	2022-07-30	5	38	9.06	7.6	1.81	49	5		Harsha	48.25	5.25	41.625	4
9	P_09	EC-693357	Control	1	2022-07-30	5	39	9.11	7.8	1.82	55	5		IC-415144	60.25	4.75	53	4.5
10	P_10	EC-693357	Control	2	2022-07-30	5	51	12.27	10.2	2.45	55.5	4		IPM-205-7	48.25	4.5	30.875	4
11	P_11	EC-693357	Control	3	2022-07-30	5	44	10.47	8.8	2.09	54	6		NM-94	42.875	4	35.625	4
12	P_12	EC-693357	Control	4	2022-07-30	5	53	12.74	10.6	2.55	59.5	4		PAU-911	60.25	5.25	53	3.75
13	P_13	EC-693357	Stress	1	2022-07-30	5	28	6.26	5.6	1.25	51	4		Vaibhav	39.75	5.75	32.125	3.75
14	P_14	EC-693357	Stress	2	2022-07-30	5	28	6.44	5.6	1.29	48.5	5		VC-3960-88	40.75	6.75	33.125	4.75
15	P_15	EC-693357	Stress	3	2022-07-30	5	28	6.31	5.6	1.26	50	5		VC-6372 (45-8-1)	43.375	5	36.125	4.75
16	P_16	EC-693357	Stress	4	2022-07-30	5	39	9.2	7.8	1.84	46.5	4
17	P_17	EC-693358	Control	1	2022-07-30	5	43	10.24	8.6	2.05	55	5
18	P_18	EC-693358	Control	2	2022-07-30	5	37	8.78	7.4	1.76	55.5	4
19	P_19	EC-693358	Control	3	2022-07-30	5	49	11.88	9.8	2.38	54	6
20	P_20	EC-693358	Control	4	2022-07-30	5	51	12.23	10.2	2.45	59.5	4
21	P_21	EC-693358	Stress	1	2022-07-30	5	24	5.34	4.8	1.07	51	4
22	P_22	EC-693358	Stress	2	2022-07-30	5	27	5.96	5.4	1.19	48.5	5
23	P_23	EC-693358	Stress	3	2022-07-30	5	21	4.56	4.2	0.91	50	5
24	P_24	EC-693358	Stress	4	2022-07-30	5	29	6.54	5.8	1.31	46.5	4
25	P_25	EC-693363	Control	1	2022-07-30	5	44	10.58	8.8	2.12	50.5	6
26	P_26	EC-693363	Control	2	2022-07-30	5	35	8.23	7	1.65	54.5	4
27	P_27	EC-693363	Control	3	2022-07-30	5	35	8.12	7	1.62	55	6
28	P_28	EC-693363	Control	4	2022-07-30	5	39	9.2	7.8	1.84	55.5	4
29	P_29	EC-693363	Stress	1	2022-07-30	5	26	5.74	5.2	1.15	33	5
30	P_30	EC-693363	Stress	2	2022-07-30	5	27	6.03	5.4	1.21	32	4
31	P_31	EC-693363	Stress	3	2022-07-30	5	29	6.51	5.8	1.3	34.5	4
32	P_32	EC-693363	Stress	4	2022-07-30	5	32	7.36	6.4	1.47	32	4
33	P_33	Harsha	Control	1	2022-07-30	5	57	13.97	11.4	2.79	48.5	5
34	P_34	Harsha	Control	2	2022-07-30	5	56	13.74	11.2	2.75	47.5	4
35	P_35	Harsha	Control	3	2022-07-30	5	44	10.56	8.8	2.11	50	6
36	P_36	Harsha	Control	4	2022-07-30	5	50	12.13	10	2.43	47	6
37	P_37	Harsha	Stress	1	2022-07-30	5	33	7.62	6.6	1.52	41	4
38	P_38	Harsha	Stress	2	2022-07-30	5	36	8.43	7.2	1.69	41.5	5
39	P_39	Harsha	Stress	3	2022-07-30	5	26	5.89	5.2	1.18	42	4
40	P_40	Harsha	Stress	4	2022-07-30	5	31	7.06	6.2	1.41	42	3
41	P_41	IC-415144	Control	1	2022-07-30	5	40	9.4	8	1.88	59.5	5
42	P_42	IC-415144	Control	2	2022-07-30	5	48	11.65	9.6	2.33	62	4
43	P_43	IC-415144	Control	3	2022-07-30	5	54	13.11	10.8	2.62	60.5	6
44	P_44	IC-415144	Control	4	2022-07-30	5	52	12.69	10.4	2.54	59	4
45	P_45	IC-415144	Stress	1	2022-07-30	5	32	7.3	6.4	1.46	50.5	4
46	P_46	IC-415144	Stress	2	2022-07-30	5	37	8.73	7.4	1.75	55	5
47	P_47	IC-415144	Stress	3	2022-07-30	5	27	6.15	5.4	1.23	52.5	5
48	P_48	IC-415144	Stress	4	2022-07-30	5	33	7.75	6.6	1.55	54	4
49	P_49	IPM-205-7	Control	1	2022-07-30	5	40	9.58	8	1.92	47.5	5
50	P_50	IPM-205-7	Control	2	2022-07-30	5	32	7.37	6.4	1.47	45.5	4
51	P_51	IPM-205-7	Control	3	2022-07-30	5	28	6.44	5.6	1.29	53.5	5
52	P_52	IPM-205-7	Control	4	2022-07-30	5	36	8.29	7.2	1.66	46.5	4
53	P_53	IPM-205-7	Stress	1	2022-07-30	5	24	5.25	4.8	1.05	31.5	5
54	P_54	IPM-205-7	Stress	2	2022-07-30	5	20	4.38	4	0.88	29	4
55	P_55	IPM-205-7	Stress	3	2022-07-30	5	20	4.15	4	0.83	32.5	4
56	P_56	IPM-205-7	Stress	4	2022-07-30	5	20	4.18	4	0.84	30.5	3
57	P_57	NM-94	Control	1	2022-07-30	5	39	9.12	7.8	1.82	39	4
58	P_58	NM-94	Control	2	2022-07-30	5	46	11.01	9.2	2.2	45	3
59	P_59	NM-94	Control	3	2022-07-30	5	46	10.99	9.2	2.2	41.5	5
60	P_60	NM-94	Control	4	2022-07-30	5	52	12.56	10.4	2.51	46	4
61	P_61	NM-94	Stress	1	2022-07-30	5	24	5.42	4.8	1.08	34.5	5
62	P_62	NM-94	Stress	2	2022-07-30	5	28	6.32	5.6	1.26	36.5	4
63	P_63	NM-94	Stress	3	2022-07-30	5	28	6.44	5.6	1.29	38	4
64	P_64	NM-94	Stress	4	2022-07-30	5	26	5.93	5.2	1.19	33.5	3
65	P_65	PAU-911	Control	1	2022-07-30	5	55	13.25	11	2.65	59.5	5
66	P_66	PAU-911	Control	2	2022-07-30	5	61	14.94	12.2	2.99	62	4
67	P_67	PAU-911	Control	3	2022-07-30	5	57	13.95	11.4	2.79	60.5	7
68	P_68	PAU-911	Control	4	2022-07-30	5	52	12.64	10.4	2.53	59	5
69	P_69	PAU-911	Stress	1	2022-07-30	5	29	6.67	5.8	1.33	50.5	4
70	P_70	PAU-911	Stress	2	2022-07-30	5	32	7.35	6.4	1.47	55	4
71	P_71	PAU-911	Stress	3	2022-07-30	5	35	8.16	7	1.63	52.5	4
72	P_72	PAU-911	Stress	4	2022-07-30	5	37	8.55	7.4	1.71	54	3
73	P_73	VC-3960-88	Control	1	2022-07-30	5	45	10.86	9	2.17	37	7
74	P_74	VC-3960-88	Control	2	2022-07-30	5	52	12.64	10.4	2.53	41.5	6
75	P_75	VC-3960-88	Control	3	2022-07-30	5	45	10.7	9	2.14	42	8
76	P_76	VC-3960-88	Control	4	2022-07-30	5	57	13.77	11.4	2.75	42.5	6
77	P_77	VC-3960-88	Stress	1	2022-07-30	5	28	6.38	5.6	1.28	33.5	5
78	P_78	VC-3960-88	Stress	2	2022-07-30	5	34	7.89	6.8	1.58	31.5	5
79	P_79	VC-3960-88	Stress	3	2022-07-30	5	28	6.21	5.6	1.24	35	5
80	P_80	VC-3960-88	Stress	4	2022-07-30	5	32	7.33	6.4	1.47	32.5	4
81	P_81	VC-6372 (45-8-1)	Control	1	2022-07-30	5	48	11.43	9.6	2.29	39.5	5
82	P_82	VC-6372 (45-8-1)	Control	2	2022-07-30	5	38	9.02	7.6	1.8	45.5	4
83	P_83	VC-6372 (45-8-1)	Control	3	2022-07-30	5	47	11.2	9.4	2.24	42	6
84	P_84	VC-6372 (45-8-1)	Control	4	2022-07-30	5	46	10.96	9.2	2.19	46.5	5
85	P_85	VC-6372 (45-8-1)	Stress	1	2022-07-30	5	30	6.86	6	1.37	35	5
86	P_86	VC-6372 (45-8-1)	Stress	2	2022-07-30	5	28	6.29	5.6	1.26	37	5
87	P_87	VC-6372 (45-8-1)	Stress	3	2022-07-30	5	35	8.07	7	1.61	38.5	5
88	P_88	VC-6372 (45-8-1)	Stress	4	2022-07-30	5	31	7.03	6.2	1.41	34	4
89	P_89	Vaibhav	Control	1	2022-07-30	5	40	9.36	8	1.87	36	6
90	P_90	Vaibhav	Control	2	2022-07-30	5	43	10.34	8.6	2.07	40.5	5
91	P_91	Vaibhav	Control	3	2022-07-30	5	39	9.21	7.8	1.84	41	7
92	P_92	Vaibhav	Control	4	2022-07-30	5	47	11.15	9.4	2.23	41.5	5
93	P_93	Vaibhav	Stress	1	2022-07-30	5	29	6.48	5.8	1.3	32.5	4
94	P_94	Vaibhav	Stress	2	2022-07-30	5	23	5	4.6	1	30.5	4
95	P_95	Vaibhav	Stress	3	2022-07-30	5	24	5.42	4.8	1.08	34	4
96	P_96	Vaibhav	Stress	4	2022-07-30	5	30	6.78	6	1.36	31.5	3

## Sheet: MorphoandYield_graphs
Water treatment	Control
Row Labels	Average of Plant height (cm)	StdDev of Plant height (cm)2	Count of Plant height (cm)3
Vaibhav	39.75	2.53311	4	1.26656	Vaibhav	39.75
VC-3960-88	40.75	2.53311	4	1.26656	VC-3960-88	40.75
NM-94	42.875	3.22426	4	1.61213	NM-94	42.875
VC-6372 (45-8-1)	43.375	3.22426	4	1.61213	VC-6372 (45-8-1)	43.375
Harsha	48.25	1.32288	4	0.661438	Harsha	48.25
IPM-205-7	48.25	3.59398	4	1.79699	IPM-205-7	48.25
EC-693363	53.875	2.28674	4	1.14337	EC-693363	53.875
EC-693358	56	2.41523	4	1.20761	EC-693358	56
EC-693357	56	2.41523	4	1.20761	EC-693357	56
EC-693356	58.5	2.41523	4	1.20761	EC-693356	58.5
IC-415144	60.25	1.32288	4	0.661438	IC-415144	60.25
PAU-911	60.25	1.32288	4	0.661438	PAU-911	60.25
Water treatment	Stress
Row Labels	Average of Plant height (cm)	StdDev of Plant height (cm)2	Count of Plant height (cm)3
IPM-205-7	30.875	1.49304	4	0.74652	IPM-205-7	30.875
Vaibhav	32.125	1.49304	4	0.74652	Vaibhav	32.125
EC-693363	32.875	1.18145	4	0.590727	EC-693363	32.875
VC-3960-88	33.125	1.49304	4	0.74652	VC-3960-88	33.125
NM-94	35.625	2.01556	4	1.00778	NM-94	35.625
VC-6372 (45-8-1)	36.125	2.01556	4	1.00778	VC-6372 (45-8-1)	36.125
Harsha	41.625	0.478714	4	0.239357	Harsha	41.625
EC-693357	49	1.95789	4	0.978945	EC-693357	49
EC-693358	49	1.95789	4	0.978945	EC-693358	49
EC-693356	51.5	1.95789	4	0.978945	EC-693356	51.5
IC-415144	53	1.95789	4	0.978945	IC-415144	53
PAU-911	53	1.95789	4	0.978945	PAU-911	53
Water treatment	Control
Row Labels	Average of No. of Primary branches	StdDev of No. of Primary branches2	Count of No. of Primary branches3
NM-94	4	0.816497	4	0.408248	NM-94	4
IPM-205-7	4.5	0.57735	4	0.288675	IPM-205-7	4.5
IC-415144	4.75	0.957427	4	0.478714	IC-415144	4.75
EC-693358	4.75	0.957427	4	0.478714	EC-693358	4.75
EC-693357	4.75	0.957427	4	0.478714	EC-693357	4.75
EC-693363	5	1.1547	4	0.57735	EC-693363	5
VC-6372 (45-8-1)	5	0.816497	4	0.408248	VC-6372 (45-8-1)	5
PAU-911	5.25	1.25831	4	0.629153	PAU-911	5.25
Harsha	5.25	0.957427	4	0.478714	Harsha	5.25
Vaibhav	5.75	0.957427	4	0.478714	Vaibhav	5.75
EC-693356	6.25	1.5	4	0.75	EC-693356	6.25
VC-3960-88	6.75	0.957427	4	0.478714	VC-3960-88	6.75
Water treatment	Stress
Row Labels	Average of No. of Primary branches	StdDev of No. of Primary branches2	Count of No. of Primary branches3
PAU-911	3.75	0.5	4	0.25	PAU-911	3.75
Vaibhav	3.75	0.5	4	0.25	Vaibhav	3.75
Harsha	4	0.816497	4	0.408248	Harsha	4
NM-94	4	0.816497	4	0.408248	NM-94	4
IPM-205-7	4	0.816497	4	0.408248	IPM-205-7	4
EC-693363	4.25	0.5	4	0.25	EC-693363	4.25
IC-415144	4.5	0.57735	4	0.288675	IC-415144	4.5
EC-693357	4.5	0.57735	4	0.288675	EC-693357	4.5
EC-693358	4.5	0.57735	4	0.288675	EC-693358	4.5
VC-3960-88	4.75	0.5	4	0.25	VC-3960-88	4.75
VC-6372 (45-8-1)	4.75	0.5	4	0.25	VC-6372 (45-8-1)	4.75
EC-693356	6	0.816497	4	0.408248	EC-693356	6
Water treatment	Control
Row Labels	Average of Podsperplant	StdDev of Podsperplant2	Count of Podsperplant3
IPM-205-7	6.8	1.0328	4	0.516398	IPM-205-7	6.8
EC-693363	7.65	0.8544	4	0.4272	EC-693363	7.65
Vaibhav	8.45	0.718795	4	0.359398	Vaibhav	8.45
VC-6372 (45-8-1)	8.95	0.914695	4	0.457347	VC-6372 (45-8-1)	8.95
EC-693358	9	1.26491	4	0.632456	EC-693358	9
NM-94	9.15	1.06301	4	0.531507	NM-94	9.15
EC-693357	9.35	1.2897	4	0.644851	EC-693357	9.35
IC-415144	9.7	1.23828	4	0.619139	IC-415144	9.7
VC-3960-88	9.95	1.17047	4	0.585235	VC-3960-88	9.95
Harsha	10.35	1.20416	4	0.60208	Harsha	10.35
PAU-911	11.25	0.754983	4	0.377492	PAU-911	11.25
EC-693356	11.7	0.90185	4	0.450925	EC-693356	11.7
Water treatment	Stress
Row Labels	Average of Podsperplant	StdDev of Podsperplant2	Count of Podsperplant3
IPM-205-7	4.2	0.4	4	0.2	IPM-205-7	4.2
EC-693358	5.05	0.7	4	0.35	EC-693358	5.05
Vaibhav	5.3	0.702377	4	0.351188	Vaibhav	5.3
NM-94	5.3	0.382971	4	0.191485	NM-94	5.3
EC-693363	5.7	0.52915	4	0.264575	EC-693363	5.7
VC-3960-88	6.1	0.6	4	0.3	VC-3960-88	6.1
EC-693357	6.15	1.1	4	0.55	EC-693357	6.15
VC-6372 (45-8-1)	6.2	0.588784	4	0.294392	VC-6372 (45-8-1)	6.2
Harsha	6.3	0.840635	4	0.420317	Harsha	6.3
IC-415144	6.45	0.822598	4	0.411299	IC-415144	6.45
PAU-911	6.65	0.7	4	0.35	PAU-911	6.65
EC-693356	8.6	0.993311	4	0.496655	EC-693356	8.6
Water treatment	Control
Row Labels	Average of Seedyieldperplant (g)	StdDev of Seedyieldperplant (g)2	Count of Seedyieldperplant (g)3
IPM-205-7	1.585	0.269629	4	0.134815	IPM-205-7	1.585
EC-693363	1.8075	0.229982	4	0.114991	EC-693363	1.8075
Vaibhav	2.0025	0.182825	4	0.0914125	Vaibhav	2.0025
VC-6372 (45-8-1)	2.13	0.223756	4	0.111878	VC-6372 (45-8-1)	2.13
EC-693358	2.16	0.318643	4	0.159321	EC-693358	2.16
NM-94	2.1825	0.282415	4	0.141208	NM-94	2.1825
EC-693357	2.2275	0.335894	4	0.167947	EC-693357	2.2275
IC-415144	2.3425	0.3317	4	0.16585	IC-415144	2.3425
VC-3960-88	2.3975	0.294321	4	0.147161	VC-3960-88	2.3975
Harsha	2.52	0.31728	4	0.15864	Harsha	2.52
PAU-911	2.74	0.197653	4	0.0988264	PAU-911	2.74
EC-693356	2.86	0.246441	4	0.123221	EC-693356	2.86
Water treatment	Stress
Row Labels	Average of Seedyieldperplant (g)	StdDev of Seedyieldperplant (g)2	Count of Seedyieldperplant (g)3
IPM-205-7	0.9	0.102307	4	0.0511534	IPM-205-7	0.9
EC-693358	1.12	0.17088	4	0.08544	EC-693358	1.12
Vaibhav	1.185	0.172337	4	0.0861684	Vaibhav	1.185
NM-94	1.205	0.0932738	4	0.0466369	NM-94	1.205
EC-693363	1.2825	0.139374	4	0.0696868	EC-693363	1.2825
VC-3960-88	1.3925	0.160286	4	0.0801431	VC-3960-88	1.3925
EC-693357	1.41	0.28717	4	0.143585	EC-693357	1.41
VC-6372 (45-8-1)	1.4125	0.146145	4	0.0730725	VC-6372 (45-8-1)	1.4125
Harsha	1.45	0.213698	4	0.106849	Harsha	1.45
IC-415144	1.4975	0.215619	4	0.10781	IC-415144	1.4975
PAU-911	1.535	0.169214	4	0.0846069	PAU-911	1.535
EC-693356	2.055	0.25	4	0.125	EC-693356	2.055
Average of Seedyieldperplant (g)
Rep	Water treatment	Genotype	Total
1	Control	EC-693356	3
		EC-693357	1.82
		EC-693358	2.05
		EC-693363	2.12
		Harsha	2.79
		IC-415144	1.88
		IPM-205-7	1.92
		NM-94	1.82
		PAU-911	2.65
		Vaibhav	1.87
		VC-3960-88	2.17
		VC-6372 (45-8-1)	2.29
	Stress	EC-693356	2.17
		EC-693357	1.25
		EC-693358	1.07
		EC-693363	1.15
		Harsha	1.52
		IC-415144	1.46
		IPM-205-7	1.05
		NM-94	1.08
		PAU-911	1.33
		Vaibhav	1.3
		VC-3960-88	1.28
		VC-6372 (45-8-1)	1.37
2	Control	EC-693356	2.87
		EC-693357	2.45
		EC-693358	1.76
		EC-693363	1.65
		Harsha	2.75
		IC-415144	2.33
		IPM-205-7	1.47
		NM-94	2.2
		PAU-911	2.99
		Vaibhav	2.07
		VC-3960-88	2.53
		VC-6372 (45-8-1)	1.8
	Stress	EC-693356	2.35
		EC-693357	1.29
		EC-693358	1.19
		EC-693363	1.21
		Harsha	1.69
		IC-415144	1.75
		IPM-205-7	0.88
		NM-94	1.26
		PAU-911	1.47
		Vaibhav	1
		VC-3960-88	1.58
		VC-6372 (45-8-1)	1.26
3	Control	EC-693356	3.06
		EC-693357	2.09
		EC-693358	2.38
		EC-693363	1.62
		Harsha	2.11
		IC-415144	2.62
		IPM-205-7	1.29
		NM-94	2.2
		PAU-911	2.79
		Vaibhav	1.84
		VC-3960-88	2.14
		VC-6372 (45-8-1)	2.24
	Stress	EC-693356	1.89
		EC-693357	1.26
		EC-693358	0.91
		EC-693363	1.3
		Harsha	1.18
		IC-415144	1.23
		IPM-205-7	0.83
		NM-94	1.29
		PAU-911	1.63
		Vaibhav	1.08
		VC-3960-88	1.24
		VC-6372 (45-8-1)	1.61
4	Control	EC-693356	2.51
		EC-693357	2.55
		EC-693358	2.45
		EC-693363	1.84
		Harsha	2.43
		IC-415144	2.54
		IPM-205-7	1.66
		NM-94	2.51
		PAU-911	2.53
		Vaibhav	2.23
		VC-3960-88	2.75
		VC-6372 (45-8-1)	2.19
	Stress	EC-693356	1.81
		EC-693357	1.84
		EC-693358	1.31
		EC-693363	1.47
		Harsha	1.41
		IC-415144	1.55
		IPM-205-7	0.84
		NM-94	1.19
		PAU-911	1.71
		Vaibhav	1.36
		VC-3960-88	1.47
		VC-6372 (45-8-1)	1.41

## Sheet: Sheet2
Gen	GY_S	Qmax_S1	Qmax_S2	Qmax_S3	Qmax_S4	Qmax_S5
EC 693356	10.27	0.74	0.703333	0.693333	0.656667	0.6
EC 693357	7.0525	0.683333	0.676667	0.62	0.59	0.43
EC 693358	5.6	0.656667	0.633333	0.58	0.49	0.356667
EC 693363	6.41	0.68	0.64	0.563333	0.543333	0.36
Harsha	7.25	0.716667	0.696667	0.646667	0.623333	0.51
IC 415144	7.4825	0.733333	0.713333	0.69	0.666667	0.596667
IPM 205-7	4.49	0.68	0.623333	0.556667	0.52	0.316667
NM 94	6.0275	0.67	0.663333	0.616667	0.536667	0.446667
PAU 911	7.6825	0.726667	0.706667	0.67	0.643333	0.56
Vaibhav	5.92	0.7	0.68	0.65	0.616667	0.556667
VC 3960-88	6.9525	0.723333	0.69	0.633333	0.613333	0.496667
VC 6372 (45-8-1)	7.0625	0.696667	0.673333	0.61	0.553333	0.43

[truncated: 12 more sheets: Chl21DAS_ANOVA, Chl45DAS_ANOVA, Chl56DAS_ANOVA, MSI21DAS_ANOVA, MSI45DAS_ANOVA, MSI56DAS_ANOVA, SeedYieldvsQYmax, NDVIvsQYmax, NDVIvsSeedYield_Matrix, NDVIvsSeedyield, Total ChlvsSeedyield, NDVIvsTotalChl]
